# Supplementary material for: Distinct modes of SMAD2 chromatin binding and remodeling shape the transcriptional response to NODAL/Activin signaling
Source: eLife. 2017 Feb 13;6:e22474. doi: 10.7554/eLife.22474 (PMC5305219; doi:10.7554/eLife.22474)
Supplement: Figure 5—source data 1. — DOI: http://dx.doi.org/10.7554/eLife.22474.015 [file elife-22474-fig5-data1.xlsx]

## Sheet: Log2FC
Consensus Peak	H3K27Ac Log2FC Activin 1 h	H3K9Ac Log2FC Activin 1 h
Ddit4 consensus_chr10_59988562_59988702	0.0615558	0.118941
Nanog consensus_chr6_122624641_122624865	0.040722	0.0351726
Zmiz1 consensus_chr14_23372059_23372254	0.153279	0.303037
Lefty1 consensus_chr1_181341049_181341199	0.321236	-0.0461186
Cd59a consensus_chr2_104122629_104122782	0.174698	0.161989
Nodal consensus_chr10_61500857_61500996	0.0534843	-0.300784
Gsc consensus_chr12_104381222_104381480	0.170519	-0.448195
Kras consensus_chr6_144361308_144361462	-0.172329	-0.180312
Cd59a consensus_chr2_104109533_104109799	0.429628	0.373104
Kras consensus_chr6_144273631_144273854	0.27691	0.507296
Hlf consensus_chr11_90371054_90371268	0.19423	0.414376
Klf10 consensus_chr15_41162279_41162512	-0.39327	-0.454395
Fgf5 consensus_chr5_98283639_98283918	0.0146178	0.117537
Nrcam consensus_chr12_44393882_44394045	-0.239379	-0.000325846
Pkdcc consensus_chr17_83320515_83320884	-0.132924	-0.0999761
Id3 consensus_chr4_138418538_138418779	0.0808632	-0.220076
Spry4 consensus_chr18_38573819_38574176	-0.301906	-0.155021
Fgf8 consensus_chr19_45790984_45791161	0.0108451	0.419463
Foxp4 consensus_chr17_47953108_47953293	0.315397	0.142942
Itch consensus_chr2_155053130_155053272	-0.241241	0.052512
Chac1 consensus_chr2_131152139_131152505	0.290945	0.352409
Egr1 consensus_chr18_34850208_34850354	0.354492	0.092348
Fgf15 consensus_chr7_144888718_144888877	0.0955461	0.352925
Irf1 consensus_chr11_55438305_55438441	0.422475	0.325456
Lgr4 consensus_chr2_109917143_109917715	0.794482	0.551273
Nrcam consensus_chr12_44327670_44327856	0.301115	0.0514728
Pmepa1 consensus_chr2_173672536_173672892	0.642837	0.346929
Kcng3 consensus_chr17_83547624_83548022	0.119623	-0.297452
Chac1 consensus_chr2_119288567_119288727	0.105806	0.00452334
Ddit4 consensus_chr10_59957919_59958288	-0.0218272	0.0186061
Kazn consensus_chr4_142140118_142140268	0.0855197	0.386116
Hes1 consensus_chr16_33737816_33738120	0.0155649	-0.127058
Fgf15 consensus_chr7_144872813_144872953	-0.21444	-0.0137738
Scamp1 consensus_chr13_94242174_94242361	-0.405609	0.286023
Calcr consensus_chr6_3623904_3624150	-0.0839325	-0.539038
Otx2 consensus_chr14_49275422_49275653	-0.554928	-0.384964
Islr2 consensus_chr9_58279246_58279681	-0.0375634	-0.0482333
Pxdc1 consensus_chr13_34741702_34742336	-0.201686	-0.343668
Il17rd consensus_chr14_27096185_27096406	0.116836	-0.112911
Sp5 consensus_chr2_70471866_70472314	0.365149	0.570511
Sp5 consensus_chr2_70474647_70475140	0.658738	0.793765
Tpm1 consensus_chr9_67105826_67106124	0.694013	0.710603
Hes1 consensus_chr16_30129541_30129713	0.582576	0.377928
Chst15 consensus_chr7_132403936_132404243	1.18833	0.742498
Wnt3 consensus_chr11_103798585_103798879	0.595477	0.220769
Fzd10 consensus_chr5_128579190_128579385	0.541524	0.507073
Gsc consensus_chr12_104473558_104473733	0.795636	0.85113
Radil consensus_chr5_142800798_142800938	0.887129	0.607796
Pmepa1 consensus_chr2_173257969_173258380	1.43717	0.833305
Chst15 consensus_chr7_132317113_132317585	1.49058	1.95088
Kbtbd3 consensus_chr9_4283761_4284275	1.59006	1.12202
Shisa3 consensus_chr5_67696783_67697780	1.40878	1.15269
Ppp4r4 consensus_chr12_103564312_103565109	0.735601	0.217099
Irf1 consensus_chr11_53786762_53787057	0.790561	0.127816
Gsc consensus_chr12_104470812_104470973	0.794685	0.471859
Pitx2 consensus_chr3_129222436_129222934	1.8168	1.9346
Dact1 consensus_chr12_71296373_71297167	0.254486	-0.100837
Kcng3 consensus_chr17_83633016_83633583	-0.182011	0.108501
Pxdc1 consensus_chr13_34685053_34685628	0.346874	-0.178004
Plekhg1 consensus_chr10_3741224_3742156	0.694939	0.53903
T consensus_chr17_8408979_8409262	0.307647	0.129869
Fgf5 consensus_chr5_98255741_98256081	0.010612	0.212921
Kcnq3 consensus_chr15_62086921_62087198	-0.0561765	0.0588807
Dact1 consensus_chr12_71301571_71302020	0.178261	0.225496
Ppp4r4 consensus_chr12_103511464_103511915	0.261803	0.215047
Scamp1 consensus_chr13_94321144_94321833	0.979787	0.704198
Spc25 consensus_chr2_69222031_69222562	0.820137	0.253481
Ap3b2 consensus_chr7_81480831_81481312	1.172	0.884539
Gsc consensus_chr12_104466887_104467386	1.16735	0.278468
Itch consensus_chr2_155115402_155116063	1.24479	0.51702
Nrcam consensus_chr12_44535560_44536334	1.1044	1.06445
Crabp2 consensus_chr3_87891547_87891945	0.709233	0.574144
Hes1 consensus_chr16_30103122_30103289	0.418594	0.116821
Epha2 consensus_chr4_140131460_140131654	0.810428	0.688324
Gt(ROSA)26Sor consensus_chr6_108644376_108644559	0.350731	0.311028
Pkdcc consensus_chr17_70900626_70901022	0.429333	0.371959
Taok3 consensus_chr5_117135600_117135895	-0.0850869	0.24109
Setd1b consensus_chr5_123245570_123245742	0.256609	-0.316931
Itch consensus_chr2_155133455_155133700	0.49023	0.179848
Id3 consensus_chr4_138453360_138453557	0.165205	0.235299
Msx1 consensus_chr5_37768802_37769120	-0.216413	-0.114097
Cxcl12 consensus_chr6_115287121_115287449	0.121341	0.17293
Trh consensus_chr6_92513869_92514072	0.342044	-0.133999
Has2 consensus_chr15_56708427_56708607	0.4404	0.15084
Gt(ROSA)26Sor consensus_chr6_108696365_108696528	0.276721	0.120627
Relt consensus_chr7_100861981_100862442	0.708094	0.673444
Id3 consensus_chr4_135963498_135963678	-0.0902423	-0.0754287
AK013883 consensus_chr16_8829488_8829637	-0.0455729	-0.022905
Eomes consensus_chr9_118389946_118390214	0.280415	0.00274622
Wnt11 consensus_chr7_90457101_90457275	-0.0108789	-0.000522461
Spats2l consensus_chr1_59448450_59448696	-0.0638326	-0.448994
Gsc consensus_chr12_111664282_111664372	0.600436	0.923362
Socs3 consensus_chr11_117941914_117942039	0.857158	0.546404
Tle3 consensus_chr9_61324251_61324332	0.766094	0.476904
Tle3 consensus_chr9_61445921_61446061	-0.00894458	-0.0652085
Wnt3 consensus_chr11_103840947_103841240	0.0827456	-0.127139
Trh consensus_chr6_92364805_92364976	-0.0924979	-0.346465
Id3 consensus_chr4_138444922_138445231	0.182089	0.354407
Zfp36l2 consensus_chr17_84177535_84177714	0.00452814	0.388143
Kcng3 consensus_chr17_83668253_83668509	0.215566	-0.0198317
Chac1 consensus_chr2_119304534_119304780	-0.0445532	0.315294
D7Ertd715e consensus_chr7_62420131_62420290	-0.271159	-0.0331024
Jun consensus_chr4_95134823_95135014	-0.205591	-0.235717
Zmiz1 consensus_chr14_25448611_25448840	-0.177975	0.0190125
Hes1 consensus_chr16_30062944_30063357	0.217538	0.181065
Gsc consensus_chr12_111672141_111672473	0.33019	0.0303402
Ski consensus_chr4_155249806_155250010	0.403087	0.288365
Chac1 consensus_chr2_119351226_119351442	-0.0384488	-0.172191
Rhob consensus_chr12_8402085_8402511	0.810403	0.892303
Radil consensus_chr5_142812838_142813177	1.01032	0.941015
AK013883 consensus_chr16_8769190_8769359	0.312749	0.193199
Hlf consensus_chr11_90356160_90356329	0.143468	0.0873356
Epha2 consensus_chr4_140126698_140126946	1.03292	0.527981
Irf1 consensus_chr11_53781310_53781506	0.55798	0.417961
Pou5f1 consensus_chr17_35485810_35485956	0.347712	0.38302
Ubr7 consensus_chr12_102702435_102702575	0.155454	0.124416
Bcar3 consensus_chr3_122434049_122434426	0.46301	0.411779
Irgm1 consensus_chr11_48871235_48871651	0.61385	0.381761
Dok5 consensus_chr2_170887653_170887870	0.269081	0.0971896
Has2 consensus_chr15_56729756_56730065	-0.0569722	0.213444
AK013883 consensus_chr16_8788044_8788566	0.636417	0.72751
AK040741 consensus_chr3_89800149_89800499	0.60317	0.500191
Xbp1 consensus_chr11_5562956_5563289	0.783748	0.473359
Islr2 consensus_chr9_58295776_58296231	0.893381	0.718612
Epha2 consensus_chr4_141338992_141339132	0.691465	0.678942
Pik3ip1 consensus_chr11_3337600_3338123	0.98639	0.957314
Il17rd consensus_chr14_25718331_25718953	0.338921	0.388555
Radil consensus_chr5_142881399_142881695	0.334274	0.207215
Trh consensus_chr6_92469737_92470184	0.228453	0.477622
Rara consensus_chr11_98925815_98926131	0.284226	0.213631
Il17rd consensus_chr14_27039338_27039517	0.593928	0.87588
Irf1 consensus_chr11_53799980_53800464	0.646682	0.785077
Calcr consensus_chr6_3677836_3678529	0.713528	0.463451
Mllt6 consensus_chr11_97661653_97662273	0.416542	0.809066
AK013883 consensus_chr16_8778570_8779080	0.644838	0.792689
Smad7 consensus_chr18_75366741_75367245	0.628432	0.763766
Kazn consensus_chr4_142166133_142166914	0.619156	0.705434
Wnt11 consensus_chr7_98840585_98841145	0.255971	0.0648155
Wnt8a consensus_chr18_34555243_34555601	0.39938	0.0968272
Zmiz1 consensus_chr14_23774570_23774832	-0.0888495	0.276583
Chac1 consensus_chr2_126523532_126523676	0.197183	0.281898
Id3 consensus_chr4_138361509_138362033	0.550483	0.572162
Dusp1 consensus_chr17_26511210_26511798	0.539206	0.500395
Chac1 consensus_chr2_126521591_126521758	0.0588641	0.6446
Wnt8a consensus_chr18_34542264_34542435	0.168741	0.100392
Irgm1 consensus_chr11_48856851_48857129	0.00998528	-0.0689903
Irgm1 consensus_chr11_48853597_48853755	-0.344275	-0.0846227
Dact1 consensus_chr12_71369195_71369340	0.381746	0.185794
Dact1 consensus_chr12_71369922_71370116	0.517074	0.204541
Cxcl12 consensus_chr6_115252107_115252377	0.425704	0.314866
Pkdcc consensus_chr17_70755079_70755371	0.479175	0.40323
Ski consensus_chr4_155189613_155190201	0.827976	1.01916
Hes1 consensus_chr16_30160400_30160832	0.594472	0.48287
Fgf15 consensus_chr7_144898506_144898931	0.990574	0.988507
Ski consensus_chr4_155191953_155192422	0.670601	0.222646
AK040741 consensus_chr3_89836176_89836827	0.291215	0.515243
AK040741 consensus_chr3_89836907_89837218	0.092694	0.552662
Socs3 consensus_chr11_117972755_117973060	0.306835	0.38601
Kras consensus_chr6_145252001_145252289	0.438912	0.379488
Fzd10 consensus_chr5_128593379_128593636	0.481405	0.760226
Hes1 consensus_chr16_30155736_30156494	0.862606	1.17994
Taok3 consensus_chr5_117121502_117122157	0.903946	1.09763
Spats2l consensus_chr1_57890161_57890956	1.19941	1.066
Fgf8 consensus_chr19_45745737_45746430	0.556056	0.416446
Dok5 consensus_chr2_170657559_170658226	0.392914	0.287951
Fgf8 consensus_chr19_45740924_45741066	0.669433	0.517246
Fgf8 consensus_chr19_45733065_45733956	0.663837	0.797962
Wnt11 consensus_chr7_98837807_98838124	0.19296	0.0471872
Trh consensus_chr6_97063168_97063423	0.272317	0.150142
1500012F01Rik consensus_chr2_167058802_167059178	-0.0173796	-0.152253
Nrcam consensus_chr12_44403632_44404236	0.315985	0.269184
Nodal consensus_chr10_61405952_61406482	1.38702	0.524825
Pkdcc consensus_chr17_83166332_83167152	1.32017	1.24865
Smad7 consensus_chr18_75360801_75361429	1.03697	0.85361
Pmepa1 consensus_chr2_173339932_173340353	1.81543	1.74145
Lefty1 consensus_chr1_180924394_180925384	2.21181	1.78708
Pmepa1 consensus_chr2_173334398_173335678	1.84976	2.05791
Plekhg1 consensus_chr10_3941333_3941499	-0.0110692	-0.0195591
Irgm1 consensus_chr11_48818441_48818699	0.168462	-0.0455448
Crabp2 consensus_chr3_87974317_87974567	0.19833	0.348974
Fhl3 consensus_chr4_124708779_124709208	0.0988088	-0.0515185
Zmiz1 consensus_chr14_25377943_25378083	0.408382	0.333886
Tle3 consensus_chr9_61372345_61372498	0.184345	0.521113
Itch consensus_chr2_155074251_155074431	0.240762	0.0343111
Ddit4 consensus_chr10_59962644_59962885	0.191299	0.0287007
Unc5b consensus_chr10_60793113_60793280	0.210179	0.279567
Crabp2 consensus_chr3_87970999_87971247	0.107924	0.421018
Id3 consensus_chr4_136031505_136031958	-0.166569	-0.369395
Pkdcc consensus_chr17_83214236_83214528	-0.0280441	0.118537
Wnt11 consensus_chr7_98815460_98815615	0.268226	0.0555709
Irf1 consensus_chr11_55461054_55461179	-0.144995	-0.173063
Slc2a1 consensus_chr4_119108741_119108988	0.0657621	0.043163
Phlda2 consensus_chr7_143467822_143467974	0.109118	-0.000724721
Chst15 consensus_chr7_132247588_132247876	-0.0318058	-0.192174
Gpx4 consensus_chr10_79988724_79988849	-0.0205781	0.0908886
Klf10 consensus_chr15_38300483_38300665	-0.023218	0.42007
Il17rd consensus_chr14_25607054_25607197	0.267845	0.38465
Dusp4 consensus_chr8_34805012_34805408	-0.182098	-0.219199
Peg10 consensus_chr6_4747369_4747494	-0.137459	-0.0166544
Tle3 consensus_chr9_61385167_61385319	-0.258435	-0.478973
Trib3 consensus_chr2_152396579_152396712	-0.021279	0.17272
Ddit4 consensus_chr10_59951664_59951902	-0.0144266	0.0428731
Rgma consensus_chr7_73399519_73399721	-0.393183	-0.656889
Pcdh1 consensus_chr18_38210652_38210850	0.119976	0.232025
Lfng consensus_chr5_140611995_140612157	0.0551084	0.327723
Zfp947 consensus_chr17_22118750_22119104	-0.139472	-0.499194
Cyr61 consensus_chr3_145649846_145649978	0.0206324	0.239023
Gadd45g consensus_chr13_51845953_51846130	-0.155971	-0.266395
Gadd45g consensus_chr13_51846534_51846659	-0.0820634	-0.275166
Fgfr2 consensus_chr7_130264662_130264897	0.166965	0.253552
Dll1 consensus_chr17_15380676_15380801	-0.37991	-0.460784
Dll1 consensus_chr17_15380813_15380866	-0.392641	-0.43844
Otx2 consensus_chr14_48700916_48701209	-0.0508227	0.0351873
Lfng consensus_chr5_140583969_140584286	0.176133	-0.0112395
Id3 consensus_chr4_136140369_136140581	0.0829686	0.0402151
Tbx3 consensus_chr5_119709831_119709975	0.362219	-0.00362082
Id2 consensus_chr12_25098494_25098699	-0.0687305	-0.0395562
Fgf8 consensus_chr19_45783535_45783679	0.0681172	0.273073
Id3 consensus_chr4_136053302_136053447	0.160876	0.11298
Smim14 consensus_chr5_65391226_65391539	0.180445	0.0678799
Lefty2 consensus_chr1_180850818_180850959	0.0104578	-0.0414665
Zfp385c consensus_chr11_100619643_100619808	0.108915	0.0928756
Insm1 consensus_chr2_146302378_146302639	-0.365509	-0.23177
Sox13 consensus_chr1_133397576_133398068	0.0607104	0.0846259
Peg10 consensus_chr6_4736810_4736968	0.424096	-0.0579003
Kras consensus_chr6_144454403_144454693	0.170749	0.0356797
Zmiz1 consensus_chr14_19585336_19585509	-0.0674249	0.141557
Sall4 consensus_chr2_168761948_168762206	-0.117112	0.0114734
Kras consensus_chr6_144251210_144251401	0.14871	0.219639
Igfbp2 consensus_chr1_72805935_72806628	0.372457	0.471301
Pkdcc consensus_chr17_70737468_70737608	0.377129	0.179021
Foxp4 consensus_chr17_47887305_47887876	0.696393	0.826079
Rara consensus_chr11_98960001_98960202	0.396159	0.598808
D7Ertd143e consensus_chr7_3206524_3206886	0.193027	-0.0607201
Zfp385c consensus_chr11_100527735_100527924	0.00173728	-0.118389
Kcng3 consensus_chr17_83526238_83526490	0.150266	0.0690275
Cd24a consensus_chr10_43551585_43551877	0.0875337	-0.204256
Zfp385c consensus_chr11_100713769_100714028	-0.140435	-0.464295
Pou5f1 consensus_chr17_35548650_35548879	0.14749	-0.0400449
Spry4 consensus_chr18_38635944_38636200	-0.249731	-0.126338
Cd24a consensus_chr10_43481135_43481437	-0.0353874	0.0376197
Ccnd2 consensus_chr6_127106877_127107026	0.114137	0.092495
Plekhg1 consensus_chr10_3851942_3852301	-0.0778727	0.322862
Irgm1 consensus_chr11_48834252_48834529	-0.334568	-0.145541
Irgm1 consensus_chr11_48833788_48834058	-0.30537	-0.157425
Dusp6 consensus_chr10_99170969_99171036	0.224275	-0.0245204
Dusp6 consensus_chr10_99170741_99170917	0.146482	0.0913124
Gm13247 consensus_chr4_146498084_146498487	-0.0218458	0.0273551
Has2 consensus_chr15_56627608_56627951	0.0770157	0.193396
Has2 consensus_chr15_56626464_56626771	-0.106076	0.053121
Zmiz1 consensus_chr14_23778040_23778573	-0.0798523	0.158313
Kras consensus_chr6_145261829_145262239	0.536152	0.663273
Shisa3 consensus_chr5_67632834_67634059	0.843965	0.672426
Epha2 consensus_chr4_141291432_141292027	1.03806	1.05918
Ppp4r4 consensus_chr12_103600388_103600857	1.15596	0.515458
Ppp4r4 consensus_chr12_103599158_103599646	1.12984	0.484021
Pmepa1 consensus_chr2_173238334_173239057	1.3916	1.61488
Eomes consensus_chr9_118487571_118487804	0.305652	0.510563
Eomes consensus_chr9_118486783_118487207	0.367571	0.506763
Cxcl12 consensus_chr6_117151734_117152782	0.652718	0.526988
Fgf5 consensus_chr5_98312032_98312336	0.848778	0.543478
Fgf5 consensus_chr5_98310053_98310554	0.285529	0.00854567
Wnt8a consensus_chr18_34549061_34549615	0.143352	0.0385953
Wnt8a consensus_chr18_34551614_34552178	-0.0246024	-0.115597
Nphs1os consensus_chr7_30463526_30464004	0.955222	0.587602
Nphs1os consensus_chr7_30464066_30464241	0.874363	0.621817
Fgf8 consensus_chr19_45743469_45743630	0.86434	0.510987
Radil consensus_chr5_142546212_142546943	1.41623	1.58866
Otx2 consensus_chr14_48707986_48708322	0.530368	0.0961494
Otx2 consensus_chr14_48709413_48709626	0.170181	0.0154635
Dusp6 consensus_chr10_99261290_99261430	0.267381	0.0289369
Has2 consensus_chr15_56742758_56743078	0.406811	0.0558108
Peg10 consensus_chr6_4739948_4740139	-0.0127835	0.100497
D7Ertd143e consensus_chr7_3213628_3213837	0.0775914	-0.0159558
Cdkn1a consensus_chr17_29032640_29032874	0.0637328	0.112493
D7Ertd143e consensus_chr7_3217652_3217973	0.209814	-0.0326904
Pkdcc consensus_chr17_70772484_70772902	-0.15378	-0.171236
Radil consensus_chr5_142906533_142906819	0.00945572	-0.0509817
Sall4 consensus_chr2_168791141_168791428	0.0904288	-0.174328
Slc2a1 consensus_chr4_119026459_119026723	-0.170762	-0.226094
Socs3 consensus_chr11_117879734_117879991	-0.202256	-0.0464306
Phc1 consensus_chr6_122366465_122366649	-0.180458	-0.34834
1500012F01Rik consensus_chr2_167063163_167063368	-0.0334139	0.0320042
Zfp36l2 consensus_chr17_84149377_84149961	0.0690694	-0.209563
Zfp36l2 consensus_chr17_84152415_84152592	0.154699	0.0575082
Unc5b consensus_chr10_60814586_60815057	0.20752	0.385706
Neat1 consensus_chr19_5802518_5802790	0.0797526	0.106493
Otx2 consensus_chr14_48662913_48663201	0.0751742	0.0342391
Dok5 consensus_chr2_170772037_170772607	0.190613	-0.00688958
Zfp385c consensus_chr11_100673015_100673393	0.267352	0.265897
Zfp385c consensus_chr11_100674104_100674553	0.355494	0.27249
Smim14 consensus_chr5_65525609_65526464	0.45289	0.472599
Il17rd consensus_chr14_27066406_27066795	0.217795	-0.0424334
Tle3 consensus_chr9_61367852_61368066	0.822756	-0.26556
Tle3 consensus_chr9_61368182_61368412	0.794716	-0.196035
Tle3 consensus_chr9_61367314_61367492	0.797166	-0.188014
Sall4 consensus_chr2_168782911_168783312	0.07648	0.146211
Myc consensus_chr15_65926152_65926942	0.757161	0.535905
Irf1 consensus_chr11_53759684_53760389	0.925936	1.06346
Ago1 consensus_chr4_126465731_126466196	1.28998	1.31204
Epha2 consensus_chr4_141284266_141284408	0.918961	0.974143
Epha2 consensus_chr4_141284518_141284750	0.979394	0.973136
Fzd10 consensus_chr5_128603194_128603404	1.02527	1.13938
AK030646 consensus_chr8_4436476_4436884	0.713654	0.782274
AK030646 consensus_chr8_4436040_4436209	0.769987	0.747042
Il17rd consensus_chr14_27044889_27045392	0.699682	0.670699
Il17rd consensus_chr14_27044304_27044591	0.854152	0.665436
Nodal consensus_chr10_61415682_61416344	0.897522	0.691612
Nodal consensus_chr10_61418888_61419589	2.12195	2.27895
Pitx2 consensus_chr3_129214714_129214896	1.5423	1.9866
T consensus_chr17_8376105_8376842	0.944007	1.1661
T consensus_chr17_8375801_8376001	0.791291	1.11604
T consensus_chr17_8377276_8377422	1.17129	1.12378
Lefty1 consensus_chr1_180934401_180935253	2.3381	2.52168
Lefty1 consensus_chr1_180933629_180934184	2.32818	2.1712
Wnt3 consensus_chr11_103772298_103772452	1.48019	1.68204
Wnt3 consensus_chr11_103770780_103771467	1.52827	1.88765
Sall4 consensus_chr2_168777065_168777396	0.21587	0.36704
Irgm1 consensus_chr11_48800410_48800567	0.132646	0.0246153
Slc2a3 consensus_chr6_122742373_122742537	0.0518805	0.090514
Cdkn1a consensus_chr17_29008194_29008596	0.0936743	0.0138137
Cdkn1a consensus_chr17_29007432_29007640	0.126767	0.0102428
Jun consensus_chr4_95052482_95052624	0.312954	0.762398
Jun consensus_chr4_95052028_95052213	0.296751	0.793184
Sall4 consensus_chr2_168780159_168780342	0.0146481	-0.215108
Radil consensus_chr5_142821774_142821827	0.225689	0.315926
Nanog consensus_chr6_122715788_122716411	0.318068	0.37496
Abcg2 consensus_chr6_58595576_58595877	0.204804	0.240505
Skil consensus_chr3_31089484_31089609	0.399737	0.00445044
Skil consensus_chr3_31087364_31087512	0.0323715	0.110138
Pik3ip1 consensus_chr11_3292790_3292951	0.284153	0.328667
Cxcl12 consensus_chr6_117180164_117180610	-0.195443	-0.347462
Gpx4 consensus_chr10_80050827_80051622	0.191856	0.27607
Gpx4 consensus_chr10_80053637_80053790	0.200273	0.157098
Hes1 consensus_chr16_33844391_33844583	0.0924501	-0.150595
Hes1 consensus_chr16_33845586_33845726	0.247219	-0.166354
Otx2 consensus_chr14_48653661_48653928	0.172434	0.138612
Otx2 consensus_chr14_48654960_48655406	0.0897438	0.0605063
L1td1 consensus_chr4_98727954_98728510	0.443912	0.621621
L1td1 consensus_chr4_98726663_98726945	0.408894	0.505336
Fst consensus_chr13_114406841_114407585	-0.0301546	-0.165532
Fst consensus_chr13_114406548_114406714	-0.0638987	-0.242127
Trh consensus_chr6_97101730_97101881	0.837922	0.615005
Trh consensus_chr6_97102282_97102637	0.72121	0.512068
Nanog consensus_chr6_122707200_122707662	0.646448	0.791073
Fzd10 consensus_chr5_128596830_128597360	1.14092	1.20391
Sox13 consensus_chr1_133493152_133493749	0.496389	0.484861
Sox13 consensus_chr1_133492580_133492862	0.473866	0.43484
Gt(ROSA)26Sor consensus_chr6_113077039_113077254	0.0249037	0.194139
Wnt3 consensus_chr11_103808652_103808831	0.700723	0.863126
Wnt3 consensus_chr11_103810386_103810439	0.811613	0.820967
Wnt3 consensus_chr11_103809172_103809552	0.699658	0.885475
Id1 consensus_chr2_152736335_152736401	0.0660794	-0.0405976
Id1 consensus_chr2_152735131_152735359	0.0730911	-0.0912332
Tbx3 consensus_chr5_119706806_119706869	-0.0340501	0.121115
Tbx3 consensus_chr5_119706579_119706794	-0.0516988	0.138568
Gm16386 consensus_chr17_22745725_22746266	0.336505	0.152068
Smad7 consensus_chr18_75353497_75353669	0.913782	0.0990126
Spats2l consensus_chr1_57862138_57862396	0.96598	0.077516
Tbx3 consensus_chr5_119613558_119613838	0.676666	0.161196
Kbtbd3 consensus_chr9_4226971_4227211	0.56085	0.567472
AK030646 consensus_chr8_4582747_4582992	0.543924	0.304346
Chst15 consensus_chr7_132320651_132320895	0.80854	0.00325314
Atf3 consensus_chr1_191190073_191190359	0.807637	0.117365
Hoxb1 consensus_chr11_96341761_96342424	1.14865	1.32369
Pcdh1 consensus_chr18_38278836_38278976	0.643917	0.45499
Dact1 consensus_chr12_71376627_71376890	0.300339	-0.186128
Eomes consensus_chr9_118384752_118384964	0.111803	0.466693
Id3 consensus_chr4_138396228_138396353	0.366843	0.103706
Efnb1 consensus_chrX_139345212_139345622	0.398242	0.189415
Cd24a consensus_chr10_44553532_44553939	0.496841	0.364586
Fgf5 consensus_chr5_98293510_98293685	0.296641	-0.284076
Sp5 consensus_chr2_70563254_70563440	0.530268	0.725745
Kazn consensus_chr4_142197117_142197286	0.241418	0.0948926
Mest consensus_chr6_30711408_30711749	0.172287	0.680621
Grsf1 consensus_chr5_88670674_88670933	0.355226	-0.202611
Kcng3 consensus_chr17_83694920_83695176	0.324271	0.283517
Crabp2 consensus_chr3_86566305_86566532	-0.284926	0.204517
Fgfr2 consensus_chr7_130327950_130328203	0.394277	0.0740942
Dok5 consensus_chr2_170726216_170726396	-0.0521608	0.307604
Hes1 consensus_chr16_33605791_33606065	0.309315	0.171495
Cdkn1a consensus_chr17_29093566_29093896	0.498561	0.546891
Hoxb1 consensus_chr11_96368741_96368886	0.108296	-0.110058
Rgma consensus_chr7_82056669_82056859	0.0910838	0.297359
Irf1 consensus_chr11_53826945_53827092	0.110996	-0.0709117
Irgm1 consensus_chr11_48826804_48827096	0.207564	0.0123359
Chst15 consensus_chr7_132360099_132360285	0.260422	0.13594
Atf3 consensus_chr1_191120954_191121020	0.119707	0.0457777
Ap3b2 consensus_chr7_81497209_81497360	0.315508	0.345713
Tle3 consensus_chr9_61293122_61293899	0.613782	0.462672
Tle3 consensus_chr9_61339317_61339544	0.472452	0.377856
Tle3 consensus_chr9_61361289_61361481	0.487993	0.197117
Klf6 consensus_chr13_5892395_5892635	-0.191336	0.295653
Spc25 consensus_chr2_69150788_69151293	0.173205	0.454983
Klf10 consensus_chr15_40955266_40955765	0.601774	0.299459
Eomes consensus_chr9_118432551_118433292	0.528958	-0.33111
Ski consensus_chr4_155290432_155291069	0.76301	0.616332
Otx2 consensus_chr14_49089813_49089999	0.0845987	-0.198858
Grsf1 consensus_chr5_88679333_88679917	-0.157465	0.412937
Grsf1 consensus_chr5_88684336_88684662	-0.0674049	-0.0916169
Eomes consensus_chr9_118455982_118456509	0.127652	0.315529
Bcar3 consensus_chr3_122414149_122414544	0.0104254	0.267159
T consensus_chr17_8389190_8389339	0.234606	0.558223
Eomes consensus_chr9_118468200_118468630	0.640088	0.542187
Cyr61 consensus_chr3_145690958_145691084	0.154635	0.140376
Peg10 consensus_chr6_4855296_4855436	-0.0201228	-0.104013
Cd59a consensus_chr2_104188245_104188452	-0.0346534	0.236362
Efnb1 consensus_chrX_139317424_139317594	0.153078	0.270878
Fgf5 consensus_chr5_98167646_98167808	-0.060666	-0.00616572
Scd1 consensus_chr19_44474304_44474435	-0.111706	0.16735
Rgma consensus_chr7_82063489_82063814	-0.254557	-0.00811887
Efnb1 consensus_chrX_106080918_106081259	0.247589	0.174717
Hlf consensus_chr11_90391688_90391958	0.232462	0.129211
Has2 consensus_chr15_54702219_54702825	0.656155	0.248347
Efnb1 consensus_chrX_145524466_145524856	0.542448	0.138872
Otx2 consensus_chr14_49155640_49155812	0.279274	-0.0672691
Dusp4 consensus_chr8_34732699_34733049	-0.493753	-0.399644
Efnb1 consensus_chrX_99045496_99045800	0.563078	0.0192732
D7Ertd143e consensus_chr7_3314282_3314409	-0.0613493	0.0222315
Fgfr2 consensus_chr7_130252207_130252429	-0.198267	-0.183882
Rgma consensus_chr7_73344144_73344284	-0.624876	0.0943155
Kras consensus_chr6_144373492_144373661	-0.111546	0.318405
Msx1 consensus_chr5_37832855_37832998	0.132986	0.166042
Ier5l consensus_chr2_30474056_30474199	0.382389	0.22316
Msx2 consensus_chr13_53455410_53455576	0.326929	0.0516203
Neurog1 consensus_chr13_56222214_56222396	0.081695	0.0591783
Msx1 consensus_chr5_37826777_37827028	0.69753	0.547222
Pim1 consensus_chr17_29451085_29451569	0.537373	0.394984
Cdx2 consensus_chr5_147304967_147305067	0.207573	0.306783
Cd24a consensus_chr10_44392015_44392352	1.27862	0.927606
Tfap2a consensus_chr13_40744792_40744854	-0.0419772	-0.254822
Gadd45g consensus_chr13_51853524_51853585	0.804952	0.431431
Efnb1 consensus_chrX_139436747_139436935	0.3963	0.372422
Efnb1 consensus_chrX_99152773_99152929	0.661494	0.353679
Ubr7 consensus_chr12_102758889_102759365	0.857144	0.751068
Ubr7 consensus_chr12_102758660_102758816	0.838174	0.746928
Fzd10 consensus_chr5_128598418_128598625	1.05681	1.0706
Nanog consensus_chr6_122702403_122702936	0.616602	0.761043
Fzd10 consensus_chr5_128601637_128601965	0.948289	0.93156
Snurf consensus_chr7_60006072_60006972	-0.447804	-0.625999
Snurf consensus_chr7_60007871_60008424	-0.422989	-0.59732
Nanog consensus_chr6_122608433_122608717	-0.0644696	-0.180908
Nanog consensus_chr6_122609943_122610121	0.037285	-0.115913
Otx2 consensus_chr14_48753109_48753424	0.00951786	-0.17151
Otx2 consensus_chr14_48754197_48754367	0.00572823	-0.221079
Slc2a3 consensus_chr6_122765209_122765420	0.0220316	0.0154033
Slc2a3 consensus_chr6_122766285_122766338	0.0336924	0.14939
Nanog consensus_chr6_122703628_122704129	0.647879	0.892282
Fzd10 consensus_chr5_128600543_128600829	0.628088	0.661797
Kras consensus_chr6_145275740_145276846	0.201121	0.559252
Kras consensus_chr6_145275052_145275342	0.457772	0.727832
Pou5f1 consensus_chr17_35504528_35506015	0.247995	0.504427
Pou5f1 consensus_chr17_35503853_35504299	0.376258	0.557955
Spaca6 consensus_chr17_17826709_17826997	1.28449	1.86663
Spaca6 consensus_chr17_17827567_17828588	1.64908	2.18368
Spaca6 consensus_chr17_17827285_17827425	1.49136	2.03146
Tdgf1 consensus_chr9_110947137_110948383	1.50752	1.74557
Tdgf1 consensus_chr9_110946531_110946721	1.52642	1.72896
Nodal consensus_chr10_61418275_61418474	2.13118	2.26551
Tdgf1 consensus_chr9_110949302_110949525	1.4994	1.50456
Spaca6 consensus_chr17_17825762_17826184	1.30959	1.6199
Pitx2 consensus_chr3_129216817_129217096	1.49206	1.79576
Pitx2 consensus_chr3_129217178_129217766	1.70071	1.90385
Pitx2 consensus_chr3_129217914_129218115	1.83336	1.86928
Lefty2 consensus_chr1_180890289_180890577	1.41877	2.24991
Lefty2 consensus_chr1_180887934_180889501	1.38631	1.83061
Lefty2 consensus_chr1_180889952_180890153	1.39538	2.0183
Trh consensus_chr6_92247122_92248225	0.552541	0.553627
Trh consensus_chr6_92246269_92246732	0.534232	0.660114
Sall4 consensus_chr2_168838785_168839141	0.0888584	-0.0500138
Setd1b consensus_chr5_123140997_123141187	0.113079	0.138434
Phc1 consensus_chr6_122340368_122340910	-0.132824	-0.30209
Phc1 consensus_chr6_122342170_122342533	-0.131834	-0.372721
Sall4 consensus_chr2_168840268_168840521	-0.0697451	-0.0897008
Sall4 consensus_chr2_168840980_168841183	-0.11129	-0.140737
Setd1b consensus_chr5_123136547_123137136	0.300539	0.413361
Setd1b consensus_chr5_123138268_123138554	0.182067	0.318391
Setd1b consensus_chr5_123137711_123137959	0.27997	0.402329

## Sheet: Read depth
Consensus Peak	H3K27Ac read depth Activin 1 h (Log2)	H3K9Ac read depth Activin 1 h (Log2)
Ddit4 consensus_chr10_59988562_59988702	13.478	14.035
Nanog consensus_chr6_122624641_122624865	13.786	14.0119
Zmiz1 consensus_chr14_23372059_23372254	13.6225	14.0926
Lefty1 consensus_chr1_181341049_181341199	13.5907	14.1408
Cd59a consensus_chr2_104122629_104122782	14.2006	13.9863
Nodal consensus_chr10_61500857_61500996	13.57	13.9448
Gsc consensus_chr12_104381222_104381480	13.3399	13.8514
Kras consensus_chr6_144361308_144361462	13.6048	13.777
Cd59a consensus_chr2_104109533_104109799	13.4931	13.938
Kras consensus_chr6_144273631_144273854	13.6973	13.7731
Hlf consensus_chr11_90371054_90371268	13.6402	13.7879
Klf10 consensus_chr15_41162279_41162512	13.0654	13.5249
Fgf5 consensus_chr5_98283639_98283918	13.484	13.5369
Nrcam consensus_chr12_44393882_44394045	13.3277	13.4847
Pkdcc consensus_chr17_83320515_83320884	13.5064	13.5604
Id3 consensus_chr4_138418538_138418779	13.6952	13.6956
Spry4 consensus_chr18_38573819_38574176	14.0839	13.6514
Fgf8 consensus_chr19_45790984_45791161	13.5914	13.9996
Foxp4 consensus_chr17_47953108_47953293	13.811	14.0306
Itch consensus_chr2_155053130_155053272	14.2339	13.9947
Chac1 consensus_chr2_131152139_131152505	13.8396	13.9917
Egr1 consensus_chr18_34850208_34850354	13.9712	14.2443
Fgf15 consensus_chr7_144888718_144888877	14.1518	14.2026
Irf1 consensus_chr11_55438305_55438441	13.813	14.2338
Lgr4 consensus_chr2_109917143_109917715	14.4291	13.8987
Nrcam consensus_chr12_44327670_44327856	14.4503	13.9084
Pmepa1 consensus_chr2_173672536_173672892	13.5163	14.0198
Kcng3 consensus_chr17_83547624_83548022	13.5612	13.8862
Chac1 consensus_chr2_119288567_119288727	14.604	14.2027
Ddit4 consensus_chr10_59957919_59958288	14.4884	14.1435
Kazn consensus_chr4_142140118_142140268	13.855	14.108
Hes1 consensus_chr16_33737816_33738120	13.7477	14.0721
Fgf15 consensus_chr7_144872813_144872953	13.9589	14.0388
Scamp1 consensus_chr13_94242174_94242361	13.5741	14.088
Calcr consensus_chr6_3623904_3624150	13.3285	13.9235
Otx2 consensus_chr14_49275422_49275653	13.5179	13.7016
Islr2 consensus_chr9_58279246_58279681	13.8565	14.2488
Pxdc1 consensus_chr13_34741702_34742336	13.5152	14.0631
Il17rd consensus_chr14_27096185_27096406	13.6371	14.245
Sp5 consensus_chr2_70471866_70472314	14.8519	14.3064
Sp5 consensus_chr2_70474647_70475140	15.0848	14.3686
Tpm1 consensus_chr9_67105826_67106124	14.112	14.3469
Hes1 consensus_chr16_30129541_30129713	13.9597	14.3869
Chst15 consensus_chr7_132403936_132404243	14.0129	14.5726
Wnt3 consensus_chr11_103798585_103798879	14.0034	14.2084
Fzd10 consensus_chr5_128579190_128579385	14.0856	14.4068
Gsc consensus_chr12_104473558_104473733	15.1953	14.2181
Radil consensus_chr5_142800798_142800938	14.2633	14.1102
Pmepa1 consensus_chr2_173257969_173258380	14.4224	14.7664
Chst15 consensus_chr7_132317113_132317585	15.6583	14.7286
Kbtbd3 consensus_chr9_4283761_4284275	14.0988	14.625
Shisa3 consensus_chr5_67696783_67697780	14.4417	14.6531
Ppp4r4 consensus_chr12_103564312_103565109	13.6937	14.3336
Irf1 consensus_chr11_53786762_53787057	13.9513	14.1975
Gsc consensus_chr12_104470812_104470973	14.9983	14.3917
Pitx2 consensus_chr3_129222436_129222934	15.0035	14.5798
Dact1 consensus_chr12_71296373_71297167	13.6706	13.9379
Kcng3 consensus_chr17_83633016_83633583	14.4029	13.702
Pxdc1 consensus_chr13_34685053_34685628	13.4087	13.8636
Plekhg1 consensus_chr10_3741224_3742156	14.3353	13.9729
T consensus_chr17_8408979_8409262	13.6144	13.7398
Fgf5 consensus_chr5_98255741_98256081	14.1707	13.3714
Kcnq3 consensus_chr15_62086921_62087198	13.3397	13.4986
Dact1 consensus_chr12_71301571_71302020	13.4784	13.5653
Ppp4r4 consensus_chr12_103511464_103511915	13.4943	13.8069
Scamp1 consensus_chr13_94321144_94321833	13.5152	13.9624
Spc25 consensus_chr2_69222031_69222562	13.3488	13.6871
Ap3b2 consensus_chr7_81480831_81481312	13.8892	13.9887
Gsc consensus_chr12_104466887_104467386	13.8948	13.9921
Itch consensus_chr2_155115402_155116063	13.835	14.1993
Nrcam consensus_chr12_44535560_44536334	13.4975	13.6331
Crabp2 consensus_chr3_87891547_87891945	13.9335	14.4555
Hes1 consensus_chr16_30103122_30103289	13.7472	14.3478
Epha2 consensus_chr4_140131460_140131654	14.3358	14.3436
Gt(ROSA)26Sor consensus_chr6_108644376_108644559	13.9932	14.2619
Pkdcc consensus_chr17_70900626_70901022	13.6074	14.2306
Taok3 consensus_chr5_117135600_117135895	13.8469	14.2106
Setd1b consensus_chr5_123245570_123245742	13.7162	14.0902
Itch consensus_chr2_155133455_155133700	14.759	14.3681
Id3 consensus_chr4_138453360_138453557	15.0023	14.3252
Msx1 consensus_chr5_37768802_37769120	13.8327	14.0307
Cxcl12 consensus_chr6_115287121_115287449	13.9811	14.1338
Trh consensus_chr6_92513869_92514072	13.8916	14.3033
Has2 consensus_chr15_56708427_56708607	13.5712	14.3338
Gt(ROSA)26Sor consensus_chr6_108696365_108696528	14.1507	14.4366
Relt consensus_chr7_100861981_100862442	14.9868	14.6274
Id3 consensus_chr4_135963498_135963678	15.1395	14.4426
AK013883 consensus_chr16_8829488_8829637	15.4507	14.5059
Eomes consensus_chr9_118389946_118390214	14.2353	14.4789
Wnt11 consensus_chr7_90457101_90457275	14.9626	14.332
Spats2l consensus_chr1_59448450_59448696	13.8815	14.3948
Gsc consensus_chr12_111664282_111664372	14.5072	14.7113
Socs3 consensus_chr11_117941914_117942039	14.4034	14.5762
Tle3 consensus_chr9_61324251_61324332	14.5986	14.6406
Tle3 consensus_chr9_61445921_61446061	14.2607	14.4759
Wnt3 consensus_chr11_103840947_103841240	14.3434	14.4276
Trh consensus_chr6_92364805_92364976	13.8928	14.094
Id3 consensus_chr4_138444922_138445231	14.2227	14.1688
Zfp36l2 consensus_chr17_84177535_84177714	13.8706	14.2647
Kcng3 consensus_chr17_83668253_83668509	13.736	14.1274
Chac1 consensus_chr2_119304534_119304780	13.9756	14.0339
D7Ertd715e consensus_chr7_62420131_62420290	14.8129	14.0496
Jun consensus_chr4_95134823_95135014	13.874	14.3516
Zmiz1 consensus_chr14_25448611_25448840	14.0399	14.1215
Hes1 consensus_chr16_30062944_30063357	15.2657	14.7568
Gsc consensus_chr12_111672141_111672473	15.4625	14.7025
Ski consensus_chr4_155249806_155250010	15.2123	14.5751
Chac1 consensus_chr2_119351226_119351442	15.3075	14.4018
Rhob consensus_chr12_8402085_8402511	14.623	15.0273
Radil consensus_chr5_142812838_142813177	15.695	14.8516
AK013883 consensus_chr16_8769190_8769359	14.3906	14.449
Hlf consensus_chr11_90356160_90356329	14.2285	14.4494
Epha2 consensus_chr4_140126698_140126946	14.1961	14.5415
Irf1 consensus_chr11_53781310_53781506	14.1927	14.6724
Pou5f1 consensus_chr17_35485810_35485956	14.3098	14.6364
Ubr7 consensus_chr12_102702435_102702575	14.6878	14.5175
Bcar3 consensus_chr3_122434049_122434426	13.9995	14.5402
Irgm1 consensus_chr11_48871235_48871651	14.4871	14.6091
Dok5 consensus_chr2_170887653_170887870	13.8604	14.2862
Has2 consensus_chr15_56729756_56730065	13.7445	14.2237
AK013883 consensus_chr16_8788044_8788566	14.2576	14.5128
AK040741 consensus_chr3_89800149_89800499	14.0598	14.3737
Xbp1 consensus_chr11_5562956_5563289	14.2466	14.3912
Islr2 consensus_chr9_58295776_58296231	14.5477	15.0677
Epha2 consensus_chr4_141338992_141339132	14.8097	14.9349
Pik3ip1 consensus_chr11_3337600_3338123	15.3242	15.2848
Il17rd consensus_chr14_25718331_25718953	14.3559	14.5665
Radil consensus_chr5_142881399_142881695	14.3832	14.5427
Trh consensus_chr6_92469737_92470184	14.0914	14.605
Rara consensus_chr11_98925815_98926131	14.8902	14.6784
Il17rd consensus_chr14_27039338_27039517	15.5614	14.7075
Irf1 consensus_chr11_53799980_53800464	14.6554	14.7811
Calcr consensus_chr6_3677836_3678529	14.0993	14.7365
Mllt6 consensus_chr11_97661653_97662273	15.9743	14.9726
AK013883 consensus_chr16_8778570_8779080	14.456	14.844
Smad7 consensus_chr18_75366741_75367245	16.2654	15.1281
Kazn consensus_chr4_142166133_142166914	14.7825	14.8511
Wnt11 consensus_chr7_98840585_98841145	14.901	14.3201
Wnt8a consensus_chr18_34555243_34555601	13.8726	14.341
Zmiz1 consensus_chr14_23774570_23774832	13.8163	14.4109
Chac1 consensus_chr2_126523532_126523676	13.9976	14.5037
Id3 consensus_chr4_138361509_138362033	14.3084	14.4159
Dusp1 consensus_chr17_26511210_26511798	14.4373	14.3398
Chac1 consensus_chr2_126521591_126521758	13.9972	14.3995
Wnt8a consensus_chr18_34542264_34542435	14.3529	14.2593
Irgm1 consensus_chr11_48856851_48857129	15.3963	14.3967
Irgm1 consensus_chr11_48853597_48853755	15.2645	14.2982
Dact1 consensus_chr12_71369195_71369340	14.3547	14.808
Dact1 consensus_chr12_71369922_71370116	14.2758	14.7811
Cxcl12 consensus_chr6_115252107_115252377	14.8111	14.8976
Pkdcc consensus_chr17_70755079_70755371	14.8185	14.7794
Ski consensus_chr4_155189613_155190201	14.654	14.9192
Hes1 consensus_chr16_30160400_30160832	14.1785	14.6464
Fgf15 consensus_chr7_144898506_144898931	15.7439	14.9929
Ski consensus_chr4_155191953_155192422	14.3477	14.7418
AK040741 consensus_chr3_89836176_89836827	14.6197	14.5429
AK040741 consensus_chr3_89836907_89837218	14.6052	14.5148
Socs3 consensus_chr11_117972755_117973060	14.7606	14.6809
Kras consensus_chr6_145252001_145252289	15.1923	14.8596
Fzd10 consensus_chr5_128593379_128593636	14.8187	14.8652
Hes1 consensus_chr16_30155736_30156494	14.6136	14.7274
Taok3 consensus_chr5_117121502_117122157	15.4537	14.7593
Spats2l consensus_chr1_57890161_57890956	14.1885	14.6804
Fgf8 consensus_chr19_45745737_45746430	14.9828	14.6702
Dok5 consensus_chr2_170657559_170658226	14.1968	14.5826
Fgf8 consensus_chr19_45740924_45741066	15.0949	14.5301
Fgf8 consensus_chr19_45733065_45733956	14.2119	14.2542
Wnt11 consensus_chr7_98837807_98838124	15.2373	14.211
Trh consensus_chr6_97063168_97063423	14.0672	14.0936
1500012F01Rik consensus_chr2_167058802_167059178	14.3288	13.9741
Nrcam consensus_chr12_44403632_44404236	13.6013	14.1869
Nodal consensus_chr10_61405952_61406482	14.4039	14.61
Pkdcc consensus_chr17_83166332_83167152	14.2662	14.4003
Smad7 consensus_chr18_75360801_75361429	14.6419	14.6278
Pmepa1 consensus_chr2_173339932_173340353	14.8791	14.8135
Lefty1 consensus_chr1_180924394_180925384	15.022	15.2197
Pmepa1 consensus_chr2_173334398_173335678	15.1015	14.8487
Plekhg1 consensus_chr10_3941333_3941499	14.5236	14.8752
Irgm1 consensus_chr11_48818441_48818699	15.4386	14.861
Crabp2 consensus_chr3_87974317_87974567	15.7135	15.0381
Fhl3 consensus_chr4_124708779_124709208	15.4419	15.1004
Zmiz1 consensus_chr14_25377943_25378083	15.5861	15.2654
Tle3 consensus_chr9_61372345_61372498	16.2192	15.0413
Itch consensus_chr2_155074251_155074431	15.1162	14.6956
Ddit4 consensus_chr10_59962644_59962885	14.576	14.6845
Unc5b consensus_chr10_60793113_60793280	14.6816	14.8034
Crabp2 consensus_chr3_87970999_87971247	15.7877	14.8485
Id3 consensus_chr4_136031505_136031958	14.4719	14.6532
Pkdcc consensus_chr17_83214236_83214528	15.5062	14.6646
Wnt11 consensus_chr7_98815460_98815615	15.27	14.6927
Irf1 consensus_chr11_55461054_55461179	14.7398	14.5259
Slc2a1 consensus_chr4_119108741_119108988	15.3457	14.7746
Phlda2 consensus_chr7_143467822_143467974	14.8755	14.6698
Chst15 consensus_chr7_132247588_132247876	14.2224	14.5321
Gpx4 consensus_chr10_79988724_79988849	15.6318	14.8096
Klf10 consensus_chr15_38300483_38300665	15.9513	14.8181
Il17rd consensus_chr14_25607054_25607197	15.6022	14.7894
Dusp4 consensus_chr8_34805012_34805408	15.6435	14.9053
Peg10 consensus_chr6_4747369_4747494	15.866	14.9102
Tle3 consensus_chr9_61385167_61385319	14.7718	14.8891
Trib3 consensus_chr2_152396579_152396712	15.8857	14.8624
Ddit4 consensus_chr10_59951664_59951902	16.1063	15.2454
Rgma consensus_chr7_73399519_73399721	15.0487	14.8157
Pcdh1 consensus_chr18_38210652_38210850	16.0251	14.9426
Lfng consensus_chr5_140611995_140612157	15.7681	15.0641
Zfp947 consensus_chr17_22118750_22119104	13.9407	14.6888
Cyr61 consensus_chr3_145649846_145649978	15.7502	14.9362
Gadd45g consensus_chr13_51845953_51846130	16.2927	15.2706
Gadd45g consensus_chr13_51846534_51846659	16.3097	15.2627
Fgfr2 consensus_chr7_130264662_130264897	16.1073	15.1851
Dll1 consensus_chr17_15380676_15380801	15.4516	15.3235
Dll1 consensus_chr17_15380813_15380866	15.452	15.3132
Otx2 consensus_chr14_48700916_48701209	14.8771	15.3626
Lfng consensus_chr5_140583969_140584286	15.667	15.6994
Id3 consensus_chr4_136140369_136140581	15.7162	15.5111
Tbx3 consensus_chr5_119709831_119709975	15.9325	16.0146
Id2 consensus_chr12_25098494_25098699	16.5948	15.8141
Fgf8 consensus_chr19_45783535_45783679	15.9198	15.2045
Id3 consensus_chr4_136053302_136053447	15.819	15.1484
Smim14 consensus_chr5_65391226_65391539	15.9409	15.2154
Lefty2 consensus_chr1_180850818_180850959	15.5871	15.1448
Zfp385c consensus_chr11_100619643_100619808	15.8554	15.2919
Insm1 consensus_chr2_146302378_146302639	14.3655	15.1057
Sox13 consensus_chr1_133397576_133398068	15.1833	15.2387
Peg10 consensus_chr6_4736810_4736968	15.4093	15.4006
Kras consensus_chr6_144454403_144454693	14.7837	15.35
Zmiz1 consensus_chr14_19585336_19585509	15.7244	15.0892
Sall4 consensus_chr2_168761948_168762206	15.1265	14.9617
Kras consensus_chr6_144251210_144251401	14.6271	15.0144
Igfbp2 consensus_chr1_72805935_72806628	14.9744	15.2632
Pkdcc consensus_chr17_70737468_70737608	14.9423	15.1188
Foxp4 consensus_chr17_47887305_47887876	15.2371	15.2492
Rara consensus_chr11_98960001_98960202	16.1965	15.4904
D7Ertd143e consensus_chr7_3206524_3206886	14.9299	15.2162
Zfp385c consensus_chr11_100527735_100527924	15.7255	15.1695
Kcng3 consensus_chr17_83526238_83526490	15.3394	15.1505
Cd24a consensus_chr10_43551585_43551877	14.6066	15.1507
Zfp385c consensus_chr11_100713769_100714028	15.3953	15.0514
Pou5f1 consensus_chr17_35548650_35548879	14.6265	15.1223
Spry4 consensus_chr18_38635944_38636200	15.0925	15.0414
Cd24a consensus_chr10_43481135_43481437	15.3896	14.8856
Ccnd2 consensus_chr6_127106877_127107026	14.9959	14.7878
Plekhg1 consensus_chr10_3851942_3852301	14.287	14.7614
Irgm1 consensus_chr11_48834252_48834529	15.0093	14.6008
Irgm1 consensus_chr11_48833788_48834058	14.9961	14.6173
Dusp6 consensus_chr10_99170969_99171036	14.4351	14.8592
Dusp6 consensus_chr10_99170741_99170917	14.4258	14.849
Gm13247 consensus_chr4_146498084_146498487	14.7024	14.8846
Has2 consensus_chr15_56627608_56627951	14.6526	14.9981
Has2 consensus_chr15_56626464_56626771	14.6527	14.9759
Zmiz1 consensus_chr14_23778040_23778573	14.1163	14.7664
Kras consensus_chr6_145261829_145262239	14.5846	14.9633
Shisa3 consensus_chr5_67632834_67634059	15.1165	15.2058
Epha2 consensus_chr4_141291432_141292027	15.5126	15.4266
Ppp4r4 consensus_chr12_103600388_103600857	14.9053	15.22
Ppp4r4 consensus_chr12_103599158_103599646	14.8947	15.2133
Pmepa1 consensus_chr2_173238334_173239057	15.2969	15.2162
Eomes consensus_chr9_118487571_118487804	15.4533	14.6393
Eomes consensus_chr9_118486783_118487207	15.3937	14.6081
Cxcl12 consensus_chr6_117151734_117152782	14.6962	14.7096
Fgf5 consensus_chr5_98312032_98312336	14.498	14.957
Fgf5 consensus_chr5_98310053_98310554	14.5014	14.8467
Wnt8a consensus_chr18_34549061_34549615	14.8234	14.6433
Wnt8a consensus_chr18_34551614_34552178	14.9961	14.9637
Nphs1os consensus_chr7_30463526_30464004	14.9822	15.0733
Nphs1os consensus_chr7_30464066_30464241	14.9918	15.0534
Fgf8 consensus_chr19_45743469_45743630	15.5651	14.9945
Radil consensus_chr5_142546212_142546943	15.3643	15.5653
Otx2 consensus_chr14_48707986_48708322	15.1023	15.4237
Otx2 consensus_chr14_48709413_48709626	15.1196	15.4259
Dusp6 consensus_chr10_99261290_99261430	16.1084	15.4875
Has2 consensus_chr15_56742758_56743078	14.9821	15.4141
Peg10 consensus_chr6_4739948_4740139	15.5267	15.3782
D7Ertd143e consensus_chr7_3213628_3213837	15.317	15.6354
Cdkn1a consensus_chr17_29032640_29032874	16.3443	15.5003
D7Ertd143e consensus_chr7_3217652_3217973	15.9643	15.4387
Pkdcc consensus_chr17_70772484_70772902	14.9634	15.2929
Radil consensus_chr5_142906533_142906819	16.1354	15.4052
Sall4 consensus_chr2_168791141_168791428	14.947	15.4925
Slc2a1 consensus_chr4_119026459_119026723	14.9582	15.4782
Socs3 consensus_chr11_117879734_117879991	15.813	15.528
Phc1 consensus_chr6_122366465_122366649	14.7796	15.3978
1500012F01Rik consensus_chr2_167063163_167063368	16.3527	15.4804
Zfp36l2 consensus_chr17_84149377_84149961	15.5681	15.6417
Zfp36l2 consensus_chr17_84152415_84152592	15.4261	15.5134
Unc5b consensus_chr10_60814586_60815057	16.5371	16.0413
Neat1 consensus_chr19_5802518_5802790	16.5527	15.9246
Otx2 consensus_chr14_48662913_48663201	16.4546	15.8415
Dok5 consensus_chr2_170772037_170772607	15.605	15.9178
Zfp385c consensus_chr11_100673015_100673393	15.6406	15.4378
Zfp385c consensus_chr11_100674104_100674553	15.6033	15.4277
Smim14 consensus_chr5_65525609_65526464	15.1032	15.6227
Il17rd consensus_chr14_27066406_27066795	14.7758	15.1595
Tle3 consensus_chr9_61367852_61368066	15.7556	15.5707
Tle3 consensus_chr9_61368182_61368412	15.7347	15.5418
Tle3 consensus_chr9_61367314_61367492	15.594	15.4654
Sall4 consensus_chr2_168782911_168783312	14.946	15.3595
Myc consensus_chr15_65926152_65926942	14.8059	15.4893
Irf1 consensus_chr11_53759684_53760389	15.9097	15.6602
Ago1 consensus_chr4_126465731_126466196	16.3972	15.9437
Epha2 consensus_chr4_141284266_141284408	16.1187	16.1555
Epha2 consensus_chr4_141284518_141284750	16.1266	16.1463
Fzd10 consensus_chr5_128603194_128603404	17.2422	16.1202
AK030646 consensus_chr8_4436476_4436884	15.5128	15.8368
AK030646 consensus_chr8_4436040_4436209	15.5001	15.8238
Il17rd consensus_chr14_27044889_27045392	15.4946	15.8322
Il17rd consensus_chr14_27044304_27044591	15.4593	15.7963
Nodal consensus_chr10_61415682_61416344	16.5566	16.0433
Nodal consensus_chr10_61418888_61419589	17.0464	16.2733
Pitx2 consensus_chr3_129214714_129214896	17.4197	16.1474
T consensus_chr17_8376105_8376842	15.5553	15.4939
T consensus_chr17_8375801_8376001	15.5588	15.4337
T consensus_chr17_8377276_8377422	15.4192	15.2683
Lefty1 consensus_chr1_180934401_180935253	16.6521	16.0933
Lefty1 consensus_chr1_180933629_180934184	16.5693	16.0983
Wnt3 consensus_chr11_103772298_103772452	17.2391	16.3455
Wnt3 consensus_chr11_103770780_103771467	16.9938	16.2239
Sall4 consensus_chr2_168777065_168777396	15.2972	15.9017
Irgm1 consensus_chr11_48800410_48800567	16.5167	15.8092
Slc2a3 consensus_chr6_122742373_122742537	16.3526	15.8025
Cdkn1a consensus_chr17_29008194_29008596	16.3769	15.7467
Cdkn1a consensus_chr17_29007432_29007640	16.3846	15.7316
Jun consensus_chr4_95052482_95052624	17.2784	16.0461
Jun consensus_chr4_95052028_95052213	17.2786	16.0191
Sall4 consensus_chr2_168780159_168780342	15.4605	16.0186
Radil consensus_chr5_142821774_142821827	17.1907	16.0751
Nanog consensus_chr6_122715788_122716411	15.5934	15.8198
Abcg2 consensus_chr6_58595576_58595877	15.804	15.849
Skil consensus_chr3_31089484_31089609	15.3777	15.8995
Skil consensus_chr3_31087364_31087512	15.2255	15.7638
Pik3ip1 consensus_chr11_3292790_3292951	17.1701	16.4679
Cxcl12 consensus_chr6_117180164_117180610	15.685	16.1456
Gpx4 consensus_chr10_80050827_80051622	16.6438	16.2557
Gpx4 consensus_chr10_80053637_80053790	16.7597	16.1228
Hes1 consensus_chr16_33844391_33844583	15.8288	16.1939
Hes1 consensus_chr16_33845586_33845726	15.8186	16.1597
Otx2 consensus_chr14_48653661_48653928	16.2544	16.0116
Otx2 consensus_chr14_48654960_48655406	16.1933	16.0023
L1td1 consensus_chr4_98727954_98728510	16.8115	16.1986
L1td1 consensus_chr4_98726663_98726945	16.8077	16.1733
Fst consensus_chr13_114406841_114407585	15.2514	15.7857
Fst consensus_chr13_114406548_114406714	15.2492	15.7825
Trh consensus_chr6_97101730_97101881	15.867	16.1891
Trh consensus_chr6_97102282_97102637	15.8721	16.1725
Nanog consensus_chr6_122707200_122707662	16.3655	16.2607
Fzd10 consensus_chr5_128596830_128597360	17.0039	16.4856
Sox13 consensus_chr1_133493152_133493749	16.94	16.7975
Sox13 consensus_chr1_133492580_133492862	16.95	16.7963
Gt(ROSA)26Sor consensus_chr6_113077039_113077254	17.2853	16.4419
Wnt3 consensus_chr11_103808652_103808831	17.265	16.5474
Wnt3 consensus_chr11_103810386_103810439	17.3059	16.6051
Wnt3 consensus_chr11_103809172_103809552	17.3377	16.6778
Id1 consensus_chr2_152736335_152736401	17.7668	16.8048
Id1 consensus_chr2_152735131_152735359	17.6609	16.7374
Tbx3 consensus_chr5_119706806_119706869	16.4501	16.4157
Tbx3 consensus_chr5_119706579_119706794	16.4344	16.3931
Gm16386 consensus_chr17_22745725_22746266	13.1311	13.7342
Smad7 consensus_chr18_75353497_75353669	13.4503	13.7169
Spats2l consensus_chr1_57862138_57862396	13.2672	13.6958
Tbx3 consensus_chr5_119613558_119613838	13.6542	13.8038
Kbtbd3 consensus_chr9_4226971_4227211	13.4082	13.8179
AK030646 consensus_chr8_4582747_4582992	13.4241	13.7894
Chst15 consensus_chr7_132320651_132320895	13.82	13.949
Atf3 consensus_chr1_191190073_191190359	13.7064	14.0379
Hoxb1 consensus_chr11_96341761_96342424	14.5288	14.1376
Pcdh1 consensus_chr18_38278836_38278976	13.8171	13.7846
Dact1 consensus_chr12_71376627_71376890	13.3032	13.5045
Eomes consensus_chr9_118384752_118384964	13.3076	13.3847
Id3 consensus_chr4_138396228_138396353	14.1559	13.4625
Efnb1 consensus_chrX_139345212_139345622	12.9979	13.4496
Cd24a consensus_chr10_44553532_44553939	13.1616	13.6247
Fgf5 consensus_chr5_98293510_98293685	13.5623	13.6367
Sp5 consensus_chr2_70563254_70563440	14.2381	13.5478
Kazn consensus_chr4_142197117_142197286	13.2672	13.4552
Mest consensus_chr6_30711408_30711749	13.5084	13.5724
Grsf1 consensus_chr5_88670674_88670933	13.1888	13.6164
Kcng3 consensus_chr17_83694920_83695176	13.347	13.5171
Crabp2 consensus_chr3_86566305_86566532	12.7795	13.3177
Fgfr2 consensus_chr7_130327950_130328203	13.7665	13.8784
Dok5 consensus_chr2_170726216_170726396	13.5588	13.8375
Hes1 consensus_chr16_33605791_33606065	13.751	13.9674
Cdkn1a consensus_chr17_29093566_29093896	14.9206	13.9699
Hoxb1 consensus_chr11_96368741_96368886	13.9957	13.8593
Rgma consensus_chr7_82056669_82056859	14.1335	13.7631
Irf1 consensus_chr11_53826945_53827092	13.7564	13.8155
Irgm1 consensus_chr11_48826804_48827096	14.2118	13.6863
Chst15 consensus_chr7_132360099_132360285	13.6229	13.7739
Atf3 consensus_chr1_191120954_191121020	13.8706	13.7084
Ap3b2 consensus_chr7_81497209_81497360	13.8124	13.724
Tle3 consensus_chr9_61293122_61293899	14.0288	14.1167
Tle3 consensus_chr9_61339317_61339544	14.0025	13.9632
Tle3 consensus_chr9_61361289_61361481	14.0244	14.0537
Klf6 consensus_chr13_5892395_5892635	13.6697	13.7865
Spc25 consensus_chr2_69150788_69151293	13.7303	13.7799
Klf10 consensus_chr15_40955266_40955765	13.4455	13.9029
Eomes consensus_chr9_118432551_118433292	13.4543	13.6031
Ski consensus_chr4_155290432_155291069	13.3184	13.7672
Otx2 consensus_chr14_49089813_49089999	13.2742	13.583
Grsf1 consensus_chr5_88679333_88679917	13.3613	13.2921
Grsf1 consensus_chr5_88684336_88684662	13.381	13.3285
Eomes consensus_chr9_118455982_118456509	13.4118	13.1335
Bcar3 consensus_chr3_122414149_122414544	13.4513	13.2294
T consensus_chr17_8389190_8389339	13.7209	12.9695
Eomes consensus_chr9_118468200_118468630	13.495	13.2202
Cyr61 consensus_chr3_145690958_145691084	13.331	13.3959
Peg10 consensus_chr6_4855296_4855436	13.2	13.3762
Cd59a consensus_chr2_104188245_104188452	13.0771	13.1762
Efnb1 consensus_chrX_139317424_139317594	12.9143	13.1729
Fgf5 consensus_chr5_98167646_98167808	13.7009	13.0566
Scd1 consensus_chr19_44474304_44474435	13.659	13.4108
Rgma consensus_chr7_82063489_82063814	13.4304	13.2741
Efnb1 consensus_chrX_106080918_106081259	12.8319	13.136
Hlf consensus_chr11_90391688_90391958	13.5412	13.0424
Has2 consensus_chr15_54702219_54702825	13.044	13.4047
Efnb1 consensus_chrX_145524466_145524856	12.398	13.096
Otx2 consensus_chr14_49155640_49155812	13.0591	12.8369
Dusp4 consensus_chr8_34732699_34733049	13.2738	13.1145
Efnb1 consensus_chrX_99045496_99045800	13.0061	13.2146
D7Ertd143e consensus_chr7_3314282_3314409	13.6097	13.895
Fgfr2 consensus_chr7_130252207_130252429	13.9318	13.8312
Rgma consensus_chr7_73344144_73344284	13.5899	13.6904
Kras consensus_chr6_144373492_144373661	13.6116	13.7171
Msx1 consensus_chr5_37832855_37832998	14.2571	14.1114
Ier5l consensus_chr2_30474056_30474199	14.9966	14.02
Msx2 consensus_chr13_53455410_53455576	13.7619	13.9258
Neurog1 consensus_chr13_56222214_56222396	14.626	14.0103
Msx1 consensus_chr5_37826777_37827028	15.5668	14.7235
Pim1 consensus_chr17_29451085_29451569	14.8907	14.6347
Cdx2 consensus_chr5_147304967_147305067	15.1972	14.4277
Cd24a consensus_chr10_44392015_44392352	14.0069	14.4736
Tfap2a consensus_chr13_40744792_40744854	14.3795	14.2925
Gadd45g consensus_chr13_51853524_51853585	14.2283	14.3359
Efnb1 consensus_chrX_139436747_139436935	12.0537	12.5081
Efnb1 consensus_chrX_99152773_99152929	13.2905	13.1235
Ubr7 consensus_chr12_102758889_102759365	17.1996	16.632
Ubr7 consensus_chr12_102758660_102758816	17.1958	16.6171
Fzd10 consensus_chr5_128598418_128598625	17.7154	16.8368
Nanog consensus_chr6_122702403_122702936	16.9169	16.8042
Fzd10 consensus_chr5_128601637_128601965	18.09	16.8614
Snurf consensus_chr7_60006072_60006972	16.5828	16.3258
Snurf consensus_chr7_60007871_60008424	16.0552	16.1777
Nanog consensus_chr6_122608433_122608717	17.0339	16.8514
Nanog consensus_chr6_122609943_122610121	16.9841	16.7267
Otx2 consensus_chr14_48753109_48753424	16.9182	16.9821
Otx2 consensus_chr14_48754197_48754367	16.8612	16.9314
Slc2a3 consensus_chr6_122765209_122765420	17.1592	17.0302
Slc2a3 consensus_chr6_122766285_122766338	17.1244	16.9848
Nanog consensus_chr6_122703628_122704129	17.1033	17.0408
Fzd10 consensus_chr5_128600543_128600829	18.2539	17.0789
Kras consensus_chr6_145275740_145276846	16.5971	16.6946
Kras consensus_chr6_145275052_145275342	16.552	16.639
Pou5f1 consensus_chr17_35504528_35506015	17.9103	17.104
Pou5f1 consensus_chr17_35503853_35504299	17.6929	16.9857
Spaca6 consensus_chr17_17826709_17826997	17.7867	16.7521
Spaca6 consensus_chr17_17827567_17828588	17.8037	16.7201
Spaca6 consensus_chr17_17827285_17827425	17.8255	16.7955
Tdgf1 consensus_chr9_110947137_110948383	17.1618	16.5677
Tdgf1 consensus_chr9_110946531_110946721	17.1187	16.4454
Nodal consensus_chr10_61418275_61418474	17.1632	16.4574
Tdgf1 consensus_chr9_110949302_110949525	16.7011	16.3162
Spaca6 consensus_chr17_17825762_17826184	17.6107	16.5748
Pitx2 consensus_chr3_129216817_129217096	17.8337	16.6289
Pitx2 consensus_chr3_129217178_129217766	17.7588	16.5881
Pitx2 consensus_chr3_129217914_129218115	17.6074	16.4806
Lefty2 consensus_chr1_180890289_180890577	17.2117	16.6988
Lefty2 consensus_chr1_180887934_180889501	17.1957	16.6691
Lefty2 consensus_chr1_180889952_180890153	17.2404	16.7451
Trh consensus_chr6_92247122_92248225	16.9874	16.9229
Trh consensus_chr6_92246269_92246732	17.0225	16.9048
Sall4 consensus_chr2_168838785_168839141	17.5173	17.311
Setd1b consensus_chr5_123140997_123141187	18.4794	17.4167
Phc1 consensus_chr6_122340368_122340910	17.3963	17.1435
Phc1 consensus_chr6_122342170_122342533	17.0638	17.0587
Sall4 consensus_chr2_168840268_168840521	17.8588	17.5911
Sall4 consensus_chr2_168840980_168841183	17.7847	17.5033
Setd1b consensus_chr5_123136547_123137136	18.6698	17.8049
Setd1b consensus_chr5_123138268_123138554	19.163	18.2523
Setd1b consensus_chr5_123137711_123137959	19.1546	18.2345

## Sheet: Analysis
Note
The analysis and the graphical representation displayed in Figure 5 were performed using Prism 6 software and replicated here.
Log2FC
Pearson correlation
r	0.862737
t-test	37.2245
p-value	4.57637e-143
Linear regression
Linear regression Y=a*X-b
a	0.92877
b	-0.0167694
R square	0.744315
Read depth
Pearson correlation
r	0.933579
t-test	56.8357
p-value	2.8529e-214
Linear regression
Linear regression Y=a*X-b
a	0.748816
b	3.66028
R square	0.87157
