# Supplementary material for: Distinct modes of SMAD2 chromatin binding and remodeling shape the transcriptional response to NODAL/Activin signaling
Source: eLife. 2017 Feb 13;6:e22474. doi: 10.7554/eLife.22474 (PMC5305219; doi:10.7554/eLife.22474)
Supplement: Figure 6—source data 1. — DOI: http://dx.doi.org/10.7554/eLife.22474.020 [file elife-22474-fig6-data1.xlsx]

## Sheet: H3K9 ac
GID	YORF	NAME	sb	X1hr	X4hr	X8hr	untreated
GENE161X	Plekhg1	consensus_chr10_3851942_3852301	14.1909	14.287	14.4697	14.4184	14.4613
GENE255X	Pou5f1	consensus_chr17_35485810_35485956	14.1517	14.3098	14.3855	14.5137	14.4159
GENE405X	AK013883	consensus_chr16_8778570_8779080	14.0732	14.456	14.4059	14.3258	14.414
GENE58X	Lgr4	consensus_chr2_109917143_109917715	14.2199	14.4291	14.5349	14.4206	14.7682
GENE395X	Chst15	consensus_chr7_132247588_132247876	14.376	14.2224	14.6078	14.4725	14.4532
GENE154X	Eomes	consensus_chr9_118389946_118390214	14.3119	14.2353	14.5003	14.4289	14.48
GENE168X	Ddit4	consensus_chr10_59957919_59958288	14.364	14.4884	14.5812	14.3019	14.447
GENE404X	AK013883	consensus_chr16_8769190_8769359	14.1006	14.3906	14.468	14.6002	14.6685
GENE307X	Id3	consensus_chr4_138361509_138362033	13.9764	14.3084	14.5542	14.6189	14.6162
GENE449X	Il17rd	consensus_chr14_25718331_25718953	14.1201	14.3559	14.7197	14.6731	14.6935
GENE308X	Id3	consensus_chr4_138396228_138396353	14.067	14.1559	14.5544	14.6457	14.6564
GENE189X	Irgm1	consensus_chr11_48826804_48827096	13.9948	14.2118	14.5948	14.4768	14.4982
GENE160X	Plekhg1	consensus_chr10_3741224_3742156	13.9089	14.3353	14.8809	14.7648	14.7284
GENE173X	Nodal	consensus_chr10_61405952_61406482	13.8209	14.4039	14.7516	14.7745	14.6867
GENE83X	Dok5	consensus_chr2_170657559_170658226	13.945	14.1968	14.8077	14.755	14.5822
GENE322X	Ski	consensus_chr4_155189613_155190201	13.9842	14.654	14.8611	14.8238	14.609
GENE198X	Irf1	consensus_chr11_53799980_53800464	13.941	14.6554	14.7348	14.6752	14.6075
GENE132X	Radil	consensus_chr5_142881399_142881695	14.2442	14.3832	14.8011	14.9007	14.7463
GENE270X	Kcng3	consensus_chr17_83633016_83633583	14.2632	14.4029	14.755	14.7643	14.8678
GENE249X	Dusp1	consensus_chr17_26511210_26511798	14.1052	14.4373	14.6534	14.84	14.8403
GENE25X	Dact1	consensus_chr12_71369195_71369340	14.2206	14.3547	14.9563	14.919	14.4827
GENE26X	Dact1	consensus_chr12_71369922_71370116	14.1418	14.2758	14.9594	14.8818	14.496
GENE445X	Zmiz1	consensus_chr14_23778040_23778573	14.2087	14.1163	14.7493	14.9182	14.4913
GENE230X	Has2	consensus_chr15_56627608_56627951	14.5668	14.6526	14.9258	14.6238	14.5364
GENE229X	Has2	consensus_chr15_56626464_56626771	14.5546	14.6527	14.9334	14.62	14.5341
GENE363X	Kras	consensus_chr6_144251210_144251401	14.4538	14.6271	14.7723	14.6144	14.357
GENE367X	Kras	consensus_chr6_144454403_144454693	14.6204	14.7837	14.9036	14.7523	14.3497
GENE253X	Cdkn1a	consensus_chr17_29093566_29093896	14.482	14.9206	14.7012	14.5832	14.7031
GENE262X	Pkdcc	consensus_chr17_70755079_70755371	14.3696	14.8185	14.8374	14.5653	14.5998
GENE3X	Igfbp2	consensus_chr1_72805935_72806628	14.5385	14.9744	14.9336	14.6086	14.7253
GENE391X	Relt	consensus_chr7_100861981_100862442	14.3614	14.9868	14.583	14.775	14.5391
GENE317X	Epha2	consensus_chr4_141338992_141339132	14.173	14.8097	14.5663	14.5386	14.352
GENE52X	Sp5	consensus_chr2_70471866_70472314	14.1976	14.8519	15.0449	14.9827	14.5211
GENE120X	Fzd10	consensus_chr5_128593379_128593636	14.0942	14.8187	15.0167	14.8029	14.3655
GENE369X	Kras	consensus_chr6_145261829_145262239	14.1455	14.5846	15.0096	14.9911	14.647
GENE194X	Irgm1	consensus_chr11_48871235_48871651	14.125	14.4871	15.128	14.8384	14.6332
GENE171X	Unc5b	consensus_chr10_60793113_60793280	14.4289	14.6816	14.613	14.5186	14.5552
GENE59X	Chac1	consensus_chr2_119288567_119288727	14.4998	14.604	14.6087	14.4229	14.6208
GENE169X	Ddit4	consensus_chr10_59962644_59962885	14.4599	14.576	14.5069	14.5403	14.5955
GENE162X	Plekhg1	consensus_chr10_3941333_3941499	14.5155	14.5236	14.6057	14.5414	14.4542
GENE400X	Phlda2	consensus_chr7_143467822_143467974	14.7782	14.8755	14.5687	14.6063	14.6657
GENE72X	Itch	consensus_chr2_155133455_155133700	14.6658	14.759	14.4943	14.541	14.6647
GENE28X	Ubr7	consensus_chr12_102702435_102702575	14.4626	14.6878	14.6209	14.7226	14.9007
GENE164X	Cd24a	consensus_chr10_43551585_43551877	14.6871	14.6066	14.8466	14.7006	14.7975
GENE304X	Id3	consensus_chr4_136031505_136031958	14.775	14.4719	14.8226	14.5344	14.9455
GENE107X	Fgf5	consensus_chr5_98312032_98312336	14.3301	14.498	14.9988	15.1798	15.0954
GENE106X	Fgf5	consensus_chr5_98310053_98310554	14.2683	14.5014	14.8775	15.0913	15.1152
GENE19X	Nrcam	consensus_chr12_44327670_44327856	14.2729	14.4503	14.7352	14.943	15.0989
GENE417X	Wnt8a	consensus_chr18_34542264_34542435	14.2917	14.3529	14.8007	14.9419	15.0555
GENE73X	1500012F01Rik	consensus_chr2_167058802_167059178	14.4067	14.3288	15.0254	15.1078	15.4058
GENE103X	Fgf5	consensus_chr5_98255741_98256081	14.0967	14.1707	14.6619	14.8894	15.3178
GENE420X	Wnt8a	consensus_chr18_34555243_34555601	14.0462	13.8726	14.6799	14.9149	14.8706
GENE235X	Myc	consensus_chr15_65926152_65926942	14.2071	14.8059	14.9661	14.8116	14.9081
GENE319X	Kazn	consensus_chr4_142166133_142166914	13.9981	14.7825	14.6014	14.6824	15.0395
GENE411X	Hes1	consensus_chr16_30155736_30156494	13.7934	14.6136	14.9953	15.0293	15.033
GENE427X	Smad7	consensus_chr18_75360801_75361429	13.8965	14.6419	14.8373	14.8332	14.9879
GENE283X	AK040741	consensus_chr3_89836176_89836827	14.426	14.6197	15.1707	15.1409	14.3451
GENE284X	AK040741	consensus_chr3_89836907_89837218	14.4025	14.6052	15.1345	15.0848	14.3152
GENE182X	Dusp6	consensus_chr10_99170969_99171036	14.5141	14.4351	15.0901	15.0665	14.4341
GENE181X	Dusp6	consensus_chr10_99170741_99170917	14.4731	14.4258	15.073	15.0479	14.4075
GENE321X	Gm13247	consensus_chr4_146498084_146498487	14.5672	14.7024	15.3504	15.351	14.4955
GENE258X	Pou5f1	consensus_chr17_35548650_35548879	14.6141	14.6265	14.9642	14.9171	14.7483
GENE224X	Socs3	consensus_chr11_117972755_117973060	14.4559	14.7606	15.0702	14.8019	14.7141
GENE345X	Cxcl12	consensus_chr6_115252107_115252377	14.5601	14.8111	15.1067	15.107	14.7735
GENE89X	Pmepa1	consensus_chr2_173334398_173335678	13.4034	15.1015	15.1042	15.1323	15.173
GENE11X	Lefty1	consensus_chr1_180924394_180925384	13.4912	15.022	15.1005	15.0779	14.9971
GENE291X	Pitx2	consensus_chr3_129222436_129222934	13.3458	15.0035	15.345	15.0867	14.6937
GENE90X	Pmepa1	consensus_chr2_173339932_173340353	13.516	14.8791	14.7247	14.9564	14.6745
GENE1X	Spats2l	consensus_chr1_57890161_57890956	13.5022	14.1885	14.8765	14.7064	14.5871
GENE265X	Pkdcc	consensus_chr17_83166332_83167152	13.3833	14.2662	14.5705	14.7293	14.587
GENE43X	Fgf8	consensus_chr19_45733065_45733956	13.5978	14.2119	14.7072	15.0411	14.785
GENE70X	Itch	consensus_chr2_155074251_155074431	15.0899	15.1162	15.1536	14.9082	15.0075
GENE75X	Sall4	consensus_chr2_168761948_168762206	15.1402	15.1265	15.0747	14.8171	15.0229
GENE303X	Id3	consensus_chr4_135963498_135963678	15.235	15.1395	15.108	15.0212	15.0311
GENE460X	Otx2	consensus_chr14_48709413_48709626	15.0802	15.1196	14.984	14.9947	15.1855
GENE459X	Otx2	consensus_chr14_48707986_48708322	15.0078	15.1023	14.9598	14.9727	15.156
GENE362X	Ccnd2	consensus_chr6_127106877_127107026	15.0196	14.9959	15.0191	15.0066	15.1328
GENE373X	D7Ertd143e	consensus_chr7_3213628_3213837	15.3101	15.317	14.9678	14.8804	15.2006
GENE388X	Wnt11	consensus_chr7_98815460_98815615	15.1861	15.27	15.0263	14.8815	15.1188
GENE268X	Kcng3	consensus_chr17_83526238_83526490	15.241	15.3394	15.1631	14.9209	15.2895
GENE425X	Spry4	consensus_chr18_38635944_38636200	15.1481	15.0925	14.812	15.013	15.3281
GENE188X	Irgm1	consensus_chr11_48818441_48818699	15.3729	15.4386	15.2546	15.1632	15.2305
GENE266X	Pkdcc	consensus_chr17_83214236_83214528	15.2989	15.5062	15.1905	15.0539	15.3431
GENE76X	Sall4	consensus_chr2_168777065_168777396	15.068	15.2972	15.1194	15.118	15.1704
GENE163X	Cd24a	consensus_chr10_43481135_43481437	15.3328	15.3896	15.0509	14.8678	15.5412
GENE407X	AK013883	consensus_chr16_8829488_8829637	15.3896	15.4507	14.9788	14.872	15.2824
GENE178X	Gpx4	consensus_chr10_79988724_79988849	15.4888	15.6318	14.7542	14.8718	14.9553
GENE301X	Fhl3	consensus_chr4_124708779_124709208	15.4751	15.4419	14.8762	14.837	14.9964
GENE448X	Il17rd	consensus_chr14_25607054_25607197	15.287	15.6022	14.6312	14.774	15.0514
GENE40X	Gsc	consensus_chr12_111672141_111672473	15.3977	15.4625	14.5988	14.7759	14.8788
GENE300X	Slc2a1	consensus_chr4_119108741_119108988	15.2998	15.3457	14.846	14.7229	14.9265
GENE329X	Peg10	consensus_chr6_4739948_4740139	15.5288	15.5267	14.9349	14.9881	14.9385
GENE328X	Peg10	consensus_chr6_4736810_4736968	15.4512	15.4093	15.0054	14.9776	14.8678
GENE446X	Zmiz1	consensus_chr14_25377943_25378083	15.2488	15.5861	15.1162	14.9145	14.981
GENE453X	Il17rd	consensus_chr14_27066406_27066795	14.7738	14.7758	15.014	14.9644	15.1852
GENE208X	Rara	consensus_chr11_98925815_98926131	14.6765	14.8902	14.822	14.8933	15.1561
GENE201X	Irf1	consensus_chr11_55461054_55461179	14.8686	14.7398	14.9749	14.9371	14.9492
GENE368X	Kras	consensus_chr6_145252001_145252289	14.7736	15.1923	15.1536	15.0278	14.9717
GENE96X	Smim14	consensus_chr5_65525609_65526464	14.7679	15.1032	14.9371	14.806	15.0165
GENE259X	Foxp4	consensus_chr17_47887305_47887876	14.4566	15.2371	14.7259	14.7679	14.9452
GENE97X	Shisa3	consensus_chr5_67632834_67634059	14.379	15.1165	14.7669	14.7367	15.1113
GENE130X	Radil	consensus_chr5_142812838_142813177	14.6859	15.695	14.8223	14.8876	14.7984
GENE185X	Pik3ip1	consensus_chr11_3337600_3338123	14.5121	15.3242	14.9623	14.7687	14.4539
GENE233X	Has2	consensus_chr15_56742758_56743078	14.8362	14.9821	14.6826	14.5053	14.68
GENE79X	Sall4	consensus_chr2_168791141_168791428	15.0059	14.947	14.5198	14.5034	14.6514
GENE372X	D7Ertd143e	consensus_chr7_3206524_3206886	14.9884	14.9299	14.5043	14.2498	14.7912
GENE147X	Tle3	consensus_chr9_61385167_61385319	15.1276	14.7718	14.6981	14.5348	14.7836
GENE4X	Sox13	consensus_chr1_133397576_133398068	15.089	15.1833	14.6812	14.5894	14.7963
GENE324X	Ski	consensus_chr4_155249806_155250010	14.9866	15.2123	14.6761	14.5578	14.6026
GENE408X	Hes1	consensus_chr16_30062944_30063357	15.0685	15.2657	14.4596	14.5815	14.844
GENE311X	Id3	consensus_chr4_138453360_138453557	14.8023	15.0023	14.7138	14.7195	14.9161
GENE387X	Wnt11	consensus_chr7_90457101_90457275	14.9952	14.9626	14.6496	14.7338	14.7765
GENE263X	Pkdcc	consensus_chr17_70772484_70772902	15.0354	14.9634	14.8557	14.6281	14.9844
GENE261X	Pkdcc	consensus_chr17_70737468_70737608	14.8318	14.9423	14.9975	14.7058	14.7593
GENE380X	D7Ertd715e	consensus_chr7_62420131_62420290	14.8979	14.8129	14.883	14.6273	14.7902
GENE382X	Rgma	consensus_chr7_73399519_73399721	15.656	15.0487	14.7947	14.652	14.8867
GENE61X	Chac1	consensus_chr2_119351226_119351442	15.4612	15.3075	14.541	14.4221	14.6758
GENE49X	Ier5l	consensus_chr2_30474056_30474199	14.7632	14.9966	14.476	14.4401	14.5315
GENE458X	Otx2	consensus_chr14_48700916_48701209	14.8901	14.8771	14.4137	14.3041	14.3805
GENE134X	Cdx2	consensus_chr5_147304967_147305067	14.855	15.1972	14.5529	14.4807	14.3709
GENE299X	Slc2a1	consensus_chr4_119026459_119026723	15.2475	14.9582	14.907	14.3483	14.4939
GENE93X	Msx1	consensus_chr5_37826777_37827028	14.976	15.5668	14.5679	14.2407	14.2965
GENE441X	Fst	consensus_chr13_114406841_114407585	15.4778	15.2514	15.79	15.6021	15.6865
GENE440X	Fst	consensus_chr13_114406548_114406714	15.4351	15.2492	15.7654	15.5877	15.6619
GENE214X	Zfp385c	consensus_chr11_100713769_100714028	15.6507	15.3953	15.5643	15.4612	15.5154
GENE143X	Tle3	consensus_chr9_61367314_61367492	15.5018	15.594	15.7031	15.6305	15.3693
GENE77X	Sall4	consensus_chr2_168780159_168780342	15.4183	15.4605	15.6306	15.5752	15.5057
GENE358X	Nanog	consensus_chr6_122715788_122716411	15.2823	15.5934	15.56	15.4724	15.5191
GENE212X	Zfp385c	consensus_chr11_100673015_100673393	15.3651	15.6406	15.6326	15.8886	15.7675
GENE213X	Zfp385c	consensus_chr11_100674104_100674553	15.3969	15.6033	15.6213	15.8999	15.7613
GENE333X	Abcg2	consensus_chr6_58595576_58595877	15.5364	15.804	15.7613	15.662	15.8509
GENE144X	Tle3	consensus_chr9_61367852_61368066	15.6	15.7556	15.7935	15.6957	15.4807
GENE145X	Tle3	consensus_chr9_61368182_61368412	15.5886	15.7347	15.7551	15.7026	15.4286
GENE7X	Lefty2	consensus_chr1_180850818_180850959	15.6179	15.5871	15.3432	15.2629	15.4357
GENE273X	Zfp36l2	consensus_chr17_84149377_84149961	15.6076	15.5681	15.382	15.2306	15.2723
GENE442X	Zmiz1	consensus_chr14_19585336_19585509	15.6187	15.7244	15.2874	15.1827	15.2521
GENE274X	Zfp36l2	consensus_chr17_84152415_84152592	15.4053	15.4261	15.4608	15.2779	15.244
GENE280X	Crabp2	consensus_chr3_87970999_87971247	15.3712	15.7877	15.1463	15.2242	15.5838
GENE281X	Crabp2	consensus_chr3_87974317_87974567	15.2963	15.7135	15.1777	15.2679	15.4945
GENE207X	Mllt6	consensus_chr11_97661653_97662273	15.2898	15.9743	15.2404	15.3231	15.6662
GENE193X	Irgm1	consensus_chr11_48856851_48857129	15.431	15.3963	15.3939	15.4444	15.8988
GENE192X	Irgm1	consensus_chr11_48853597_48853755	15.3044	15.2645	15.4526	15.4779	15.8554
GENE277X	Skil	consensus_chr3_31089484_31089609	15.3117	15.3777	15.169	15.16	15.7528
GENE276X	Skil	consensus_chr3_31087364_31087512	15.2577	15.2255	15.1351	15.1157	15.6671
GENE222X	Socs3	consensus_chr11_117879734_117879991	15.8702	15.813	15.6851	15.4898	15.692
GENE305X	Id3	consensus_chr4_136053302_136053447	15.824	15.819	15.583	15.4086	15.6082
GENE210X	Zfp385c	consensus_chr11_100527735_100527924	15.8796	15.7255	15.5708	15.2818	15.6782
GENE374X	D7Ertd143e	consensus_chr7_3217652_3217973	15.9948	15.9643	15.5296	15.3047	15.7287
GENE95X	Smim14	consensus_chr5_65391226_65391539	15.9125	15.9409	15.5294	15.3521	15.5682
GENE211X	Zfp385c	consensus_chr11_100619643_100619808	15.7814	15.8554	15.5541	15.319	15.448
GENE47X	Fgf8	consensus_chr19_45783535_45783679	15.696	15.9198	15.3461	15.2531	15.5275
GENE241X	Dll1	consensus_chr17_15380676_15380801	15.8267	15.4516	15.2431	15.2709	15.5291
GENE242X	Dll1	consensus_chr17_15380813_15380866	15.8133	15.452	15.2482	15.2747	15.5323
GENE348X	Cxcl12	consensus_chr6_117180164_117180610	15.9596	15.685	15.3442	15.3503	15.3926
GENE146X	Tle3	consensus_chr9_61372345_61372498	15.778	16.2192	15.5351	15.1437	15.6143
GENE209X	Rara	consensus_chr11_98960001_98960202	15.5602	16.1965	15.2091	15.1312	15.5583
GENE428X	Smad7	consensus_chr18_75366741_75367245	15.491	16.2654	15.3724	15.3676	15.8431
GENE422X	Pcdh1	consensus_chr18_38210652_38210850	15.8117	16.0251	15.0161	15.0107	15.209
GENE66X	Trib3	consensus_chr2_152396579_152396712	15.8284	15.8857	14.99	14.954	15.3009
GENE330X	Peg10	consensus_chr6_4747369_4747494	15.9203	15.866	15.1597	14.9674	15.3936
GENE167X	Ddit4	consensus_chr10_59951664_59951902	16.0584	16.1063	15.1071	15.0205	15.5239
GENE225X	Klf10	consensus_chr15_38300483_38300665	15.5305	15.9513	14.781	14.845	15.3783
GENE470X	Dusp4	consensus_chr8_34805012_34805408	15.7575	15.6435	14.9725	14.6703	15.3578
GENE341X	Trh	consensus_chr6_97102282_97102637	15.3653	15.8721	16.1011	15.9855	16.0744
GENE340X	Trh	consensus_chr6_97101730_97101881	15.3748	15.867	16.0634	15.998	16.0776
GENE357X	Nanog	consensus_chr6_122707200_122707662	15.6113	16.3655	16.1331	16.0076	16.0303
GENE415X	Hes1	consensus_chr16_33844391_33844583	15.9739	15.8288	15.7536	15.592	16.0403
GENE416X	Hes1	consensus_chr16_33845586_33845726	15.9509	15.8186	15.7568	15.6199	16.0229
GENE315X	Epha2	consensus_chr4_141284518_141284750	15.0995	16.1266	15.8515	15.7838	15.7717
GENE314X	Epha2	consensus_chr4_141284266_141284408	15.0973	16.1187	15.8261	15.7676	15.7658
GENE195X	Irf1	consensus_chr11_53759684_53760389	14.9471	15.9097	15.6534	15.4783	15.6515
GENE302X	Ago1	consensus_chr4_126465731_126466196	15.3216	16.3972	15.7105	15.549	16.0272
GENE133X	Radil	consensus_chr5_142906533_142906819	16.1726	16.1354	15.7707	15.4156	15.6387
GENE183X	Dusp6	consensus_chr10_99261290_99261430	16.078	16.1084	15.6137	15.3968	15.7211
GENE172X	Unc5b	consensus_chr10_60814586_60815057	16.1774	16.5371	15.497	15.3715	15.5691
GENE457X	Otx2	consensus_chr14_48662913_48663201	16.3613	16.4546	15.6899	15.4737	15.9498
GENE252X	Cdkn1a	consensus_chr17_29032640_29032874	16.2607	16.3443	15.8238	15.5501	15.9424
GENE112X	Tbx3	consensus_chr5_119706806_119706869	16.3783	16.4501	15.5561	15.513	15.1212
GENE111X	Tbx3	consensus_chr5_119706579_119706794	16.357	16.4344	15.5219	15.4804	15.1168
GENE127X	Lfng	consensus_chr5_140611995_140612157	15.5463	15.7681	14.9742	14.8303	14.9092
GENE85X	Dok5	consensus_chr2_170772037_170772607	15.5266	15.605	14.969	14.8047	14.8347
GENE126X	Lfng	consensus_chr5_140583969_140584286	15.7013	15.667	14.8977	14.6956	14.8575
GENE306X	Id3	consensus_chr4_136140369_136140581	15.6422	15.7162	14.8341	14.5803	14.5202
GENE292X	Cyr61	consensus_chr3_145649846_145649978	15.5665	15.7502	14.6095	14.5839	14.7691
GENE393X	Fgfr2	consensus_chr7_130264662_130264897	15.8543	16.1073	14.6295	14.5239	14.8082
GENE113X	Tbx3	consensus_chr5_119709831_119709975	15.8708	15.9325	15.2883	15.1902	14.6165
GENE433X	Gadd45g	consensus_chr13_51845953_51846130	16.2962	16.2927	14.9113	14.7932	14.8834
GENE434X	Gadd45g	consensus_chr13_51846534_51846659	16.3263	16.3097	14.8448	14.7858	14.8807
GENE18X	Id2	consensus_chr12_25098494_25098699	16.6583	16.5948	15.0646	14.959	15.1711
GENE38X	Gsc	consensus_chr12_104473558_104473733	14.4101	15.1953	14.9632	15.2137	15.3021
GENE37X	Gsc	consensus_chr12_104470812_104470973	14.3416	14.9983	15.1673	15.2494	15.2352
GENE87X	Pmepa1	consensus_chr2_173238334_173239057	14.0607	15.2969	15.3237	15.3882	15.6785
GENE396X	Chst15	consensus_chr7_132317113_132317585	14.1506	15.6583	15.2486	15.0834	15.2436
GENE128X	Radil	consensus_chr5_142546212_142546943	14.051	15.3643	15.4112	15.2321	15.0038
GENE377X	Nphs1os	consensus_chr7_30464066_30464241	14.4042	14.9918	15.565	15.4177	15.0714
GENE376X	Nphs1os	consensus_chr7_30463526_30464004	14.3976	14.9822	15.5736	15.4126	15.0533
GENE53X	Sp5	consensus_chr2_70474647_70475140	14.2606	15.0848	15.1438	15.254	14.8029
GENE34X	Ppp4r4	consensus_chr12_103600388_103600857	14.4459	14.9053	15.3452	15.5003	15.7509
GENE33X	Ppp4r4	consensus_chr12_103599158_103599646	14.3851	14.8947	15.317	15.4719	15.7452
GENE347X	Cxcl12	consensus_chr6_117151734_117152782	14.2103	14.6962	15.218	15.6554	15.6451
GENE46X	Fgf8	consensus_chr19_45745737_45746430	14.6949	14.9828	15.5273	15.759	15.4471
GENE44X	Fgf8	consensus_chr19_45740924_45741066	14.4426	15.0949	15.415	15.8565	15.585
GENE467X	AK030646	consensus_chr8_4436476_4436884	14.8402	15.5128	15.4589	15.4259	15.6902
GENE466X	AK030646	consensus_chr8_4436040_4436209	14.8349	15.5001	15.4771	15.4333	15.6777
GENE108X	Taok3	consensus_chr5_117121502_117122157	14.4859	15.4537	15.3215	15.3134	15.516
GENE450X	Il17rd	consensus_chr14_27039338_27039517	14.7333	15.5614	15.3215	15.2124	15.4365
GENE403X	Fgf15	consensus_chr7_144898506_144898931	14.7078	15.7439	15.266	15.0399	15.3692
GENE316X	Epha2	consensus_chr4_141291432_141292027	14.6329	15.5126	15.1936	15.2052	15.0131
GENE191X	Irgm1	consensus_chr11_48834252_48834529	15.0716	15.0093	15.3348	15.3913	15.2848
GENE190X	Irgm1	consensus_chr11_48833788_48834058	15.0473	14.9961	15.3165	15.383	15.2444
GENE78X	Sall4	consensus_chr2_168782911_168783312	14.9587	14.946	15.3048	15.2218	15.0475
GENE351X	Phc1	consensus_chr6_122366465_122366649	15.0048	14.7796	15.1386	15.1037	15.1733
GENE389X	Wnt11	consensus_chr7_98837807_98838124	14.9874	15.2373	14.9392	15.5267	15.6186
GENE390X	Wnt11	consensus_chr7_98840585_98841145	14.7676	14.901	14.9753	15.5621	15.5698
GENE237X	T	consensus_chr17_8376105_8376842	14.7611	15.5553	16.1962	16.2984	16.0801
GENE236X	T	consensus_chr17_8375801_8376001	14.7695	15.5588	16.1971	16.2891	16.052
GENE45X	Fgf8	consensus_chr19_45743469_45743630	15.0354	15.5651	16.0403	16.3735	16.0662
GENE238X	T	consensus_chr17_8377276_8377422	14.5831	15.4192	16.0413	16.1337	15.9247
GENE159X	Eomes	consensus_chr9_118487571_118487804	15.0362	15.4533	15.8793	15.8285	16.2995
GENE158X	Eomes	consensus_chr9_118486783_118487207	15.0129	15.3937	15.842	15.7844	16.2382
GENE452X	Il17rd	consensus_chr14_27044889_27045392	15.0031	15.4946	15.962	15.8409	15.8819
GENE451X	Il17rd	consensus_chr14_27044304_27044591	14.9485	15.4593	15.915	15.8342	15.8368
GENE419X	Wnt8a	consensus_chr18_34551614_34552178	15.1563	14.9961	15.6461	15.8378	16.1375
GENE418X	Wnt8a	consensus_chr18_34549061_34549615	14.9272	14.8234	15.4321	15.602	15.9821
GENE200X	Irf1	consensus_chr11_55438305_55438441	13.8198	13.813	14.2421	14.3454	13.8707
GENE92X	Msx1	consensus_chr5_37768802_37769120	13.7885	13.8327	14.1545	14.3623	13.8971
GENE354X	Nanog	consensus_chr6_122624641_122624865	13.7834	13.786	14.2487	14.4629	13.8304
GENE414X	Hes1	consensus_chr16_33737816_33738120	13.814	13.7477	14.3744	14.4291	13.9226
GENE260X	Foxp4	consensus_chr17_47953108_47953293	13.6989	13.811	14.3572	14.4089	13.9241
GENE109X	Taok3	consensus_chr5_117135600_117135895	13.6502	13.8469	14.3047	14.2986	13.9002
GENE64X	Chac1	consensus_chr2_131152139_131152505	13.5811	13.8396	14.208	14.3485	13.7484
GENE60X	Chac1	consensus_chr2_119304534_119304780	13.7175	13.9756	14.1571	14.3666	13.847
GENE197X	Irf1	consensus_chr11_53786762_53787057	13.6343	13.9513	14.4219	14.4286	14.0339
GENE36X	Gsc	consensus_chr12_104466887_104467386	13.5752	13.8948	14.4216	14.3053	13.9695
GENE141X	Tle3	consensus_chr9_61339317_61339544	13.577	14.0025	14.5028	14.3566	13.8713
GENE139X	Tle3	consensus_chr9_61293122_61293899	13.7895	14.0288	14.4144	14.3037	13.9223
GENE119X	Fzd10	consensus_chr5_128579190_128579385	13.7143	14.0856	14.41	14.3781	13.6737
GENE142X	Tle3	consensus_chr9_61361289_61361481	13.7211	14.0244	14.3194	14.3286	13.6488
GENE275X	Zfp36l2	consensus_chr17_84177535_84177714	13.8004	13.8706	14.391	14.3419	13.7294
GENE15X	Atf3	consensus_chr1_191120954_191121020	13.7796	13.8706	14.4186	14.5051	13.4857
GENE410X	Hes1	consensus_chr16_30129541_30129713	13.6599	13.9597	14.5025	14.3968	13.5392
GENE397X	Chst15	consensus_chr7_132320651_132320895	13.4119	13.82	14.445	14.5005	13.5274
GENE199X	Irf1	consensus_chr11_53826945_53827092	13.6033	13.7564	14.3371	14.4817	13.4688
GENE86X	Dok5	consensus_chr2_170887653_170887870	13.7315	13.8604	14.7529	14.4276	13.5944
GENE447X	Zmiz1	consensus_chr14_25448611_25448840	14.0105	14.0399	14.4287	14.5492	13.8335
GENE206X	Hoxb1	consensus_chr11_96368741_96368886	13.9957	13.9957	14.4033	14.4994	13.8769
GENE392X	Fgfr2	consensus_chr7_130252207_130252429	14.1798	13.9318	14.3064	14.3065	13.8229
GENE2X	Spats2l	consensus_chr1_59448450_59448696	14.1365	13.8815	14.534	14.4443	14.0602
GENE118X	Setd1b	consensus_chr5_123245570_123245742	14.0495	13.7162	14.5121	14.3914	13.9933
GENE217X	Wnt3	consensus_chr11_103798585_103798879	13.9162	14.0034	14.5465	14.645	13.6887
GENE346X	Cxcl12	consensus_chr6_115287121_115287449	13.8152	13.9811	14.4876	14.6443	13.7214
GENE338X	Trh	consensus_chr6_92513869_92514072	13.8609	13.8916	14.5854	14.6793	13.6421
GENE444X	Zmiz1	consensus_chr14_23774570_23774832	13.9432	13.8163	14.4479	14.6698	13.7351
GENE336X	Trh	consensus_chr6_92364805_92364976	13.9009	13.8928	14.6582	14.8617	13.7793
GENE39X	Gsc	consensus_chr12_111664282_111664372	14.0135	14.5072	14.2264	14.3225	13.7679
GENE94X	Msx1	consensus_chr5_37832855_37832998	13.9573	14.2571	14.2805	14.1863	13.684
GENE17X	Rhob	consensus_chr12_8402085_8402511	13.7764	14.623	14.3788	14.22	13.5168
GENE296X	Jun	consensus_chr4_95134823_95135014	13.95	13.874	14.163	14.3181	13.562
GENE435X	Gadd45g	consensus_chr13_51853524_51853585	13.8444	14.2283	14.1654	14.0706	13.4424
GENE399X	Chst15	consensus_chr7_132403936_132404243	13.3609	14.0129	14.2521	14.124	13.6814
GENE279X	Crabp2	consensus_chr3_87891547_87891945	13.4958	13.9335	14.134	14.154	13.6548
GENE149X	Tpm1	consensus_chr9_67105826_67106124	13.572	14.112	14.3219	14.1433	13.5669
GENE98X	Shisa3	consensus_chr5_67696783_67697780	13.3307	14.4417	14.326	14.1348	13.947
GENE129X	Radil	consensus_chr5_142800798_142800938	13.9374	14.2633	14.5587	14.4434	14.2594
GENE186X	Xbp1	consensus_chr11_5562956_5563289	13.8771	14.2466	14.5737	14.5257	14.2351
GENE202X	Hlf	consensus_chr11_90356160_90356329	13.9869	14.2285	14.513	14.5218	14.1188
GENE196X	Irf1	consensus_chr11_53781310_53781506	13.8961	14.1927	14.5749	14.5548	14.0177
GENE337X	Trh	consensus_chr6_92469737_92470184	13.7889	14.0914	14.5894	14.6503	14.0348
GENE342X	Gt(ROSA)26Sor	consensus_chr6_108644376_108644559	13.7952	13.9932	14.5421	14.4918	14.1064
GENE312X	Epha2	consensus_chr4_140126698_140126946	13.7317	14.1961	14.3825	14.4885	14.0526
GENE63X	Chac1	consensus_chr2_126523532_126523676	13.6883	13.9976	14.6093	14.7098	14.3092
GENE62X	Chac1	consensus_chr2_126521591_126521758	13.6802	13.9972	14.5363	14.5841	14.3328
GENE54X	Sp5	consensus_chr2_70563254_70563440	13.6794	14.2381	14.2248	14.4387	14.2871
GENE406X	AK013883	consensus_chr16_8788044_8788566	13.5439	14.2576	14.4053	14.2996	14.223
GENE205X	Hoxb1	consensus_chr11_96341761_96342424	13.8274	14.5288	14.3967	14.4041	14.2336
GENE424X	Spry4	consensus_chr18_38573819_38574176	14.0189	14.0839	14.4543	14.3701	14.1828
GENE401X	Fgf15	consensus_chr7_144872813_144872953	13.9103	13.9589	14.426	14.3865	14.19
GENE421X	Egr1	consensus_chr18_34850208_34850354	14.0438	13.9712	14.3085	14.3688	14.0788
GENE402X	Fgf15	consensus_chr7_144888718_144888877	13.9719	14.1518	14.347	14.4819	14.1356
GENE385X	Rgma	consensus_chr7_82056669_82056859	13.9999	14.1335	14.3435	14.2564	14.1018
GENE56X	Cd59a	consensus_chr2_104122629_104122782	13.9588	14.2006	14.2859	14.2352	14.1396
GENE286X	Bcar3	consensus_chr3_122434049_122434426	13.8273	13.9995	14.3135	14.3079	14.2501
GENE318X	Kazn	consensus_chr4_142140118_142140268	13.7575	13.855	14.2186	14.3028	14.1317
GENE327X	Calcr	consensus_chr6_3677836_3678529	13.7461	14.0993	14.4527	14.228	14.3656
GENE282X	AK040741	consensus_chr3_89800149_89800499	13.5906	14.0598	14.6056	14.3038	14.1207
GENE343X	Gt(ROSA)26Sor	consensus_chr6_108696365_108696528	14.0705	14.1507	14.8307	14.8512	14.2412
GENE339X	Trh	consensus_chr6_97063168_97063423	13.9749	14.0672	14.6153	14.8292	14.1657
GENE323X	Ski	consensus_chr4_155191953_155192422	13.7887	14.3477	14.6603	14.7332	14.3132
GENE412X	Hes1	consensus_chr16_30160400_30160832	13.8053	14.1785	14.6483	14.8164	14.2367
GENE88X	Pmepa1	consensus_chr2_173257969_173258380	13.7224	14.4224	14.768	14.6021	14.0182
GENE313X	Epha2	consensus_chr4_140131460_140131654	13.5934	14.3358	14.7801	14.7095	14.0348
GENE138X	Islr2	consensus_chr9_58295776_58296231	14.058	14.5477	14.6556	14.5631	14.0352
GENE223X	Socs3	consensus_chr11_117941914_117942039	14.0172	14.4034	14.4965	14.5788	14.0979
GENE140X	Tle3	consensus_chr9_61324251_61324332	14.1906	14.5986	14.4276	14.4291	14.0444
GENE310X	Id3	consensus_chr4_138444922_138445231	14.1099	14.2227	14.618	14.6416	13.9252
GENE148X	Tle3	consensus_chr9_61445921_61446061	14.1493	14.2607	14.6557	14.3765	14.0465
GENE65X	Insm1	consensus_chr2_146302378_146302639	14.5742	14.3655	14.4743	14.3039	14.2557
GENE69X	Itch	consensus_chr2_155053130_155053272	14.3806	14.2339	14.2886	14.373	14.3866
GENE221X	Wnt3	consensus_chr11_103840947_103841240	14.359	14.3434	14.3176	14.3857	14.0413
GENE437X	Neurog1	consensus_chr13_56222214_56222396	14.5499	14.626	14.2252	14.0339	14.3012
GENE254X	Pim1	consensus_chr17_29451085_29451569	14.3422	14.8907	14.5101	14.1163	13.9046
GENE432X	Tfap2a	consensus_chr13_40744792_40744854	14.5823	14.3795	13.8993	13.8592	13.6213
GENE247X	Zfp947	consensus_chr17_22118750_22119104	14.3399	13.9407	14.0949	13.9253	13.8611
GENE102X	Fgf5	consensus_chr5_98167646_98167808	13.7968	13.7009	14.1844	14.1224	14.3081
GENE23X	Dact1	consensus_chr12_71296373_71297167	13.7237	13.6706	14.097	14.1797	14.3451
GENE454X	Il17rd	consensus_chr14_27096185_27096406	13.9017	13.6371	14.1731	14.1942	14.2228
GENE431X	Pxdc1	consensus_chr13_34741702_34742336	13.6031	13.5152	14.0745	14.3776	14.3917
GENE204X	Hlf	consensus_chr11_90391688_90391958	13.5379	13.5412	13.9062	14.2626	14.4099
GENE430X	Pxdc1	consensus_chr13_34685053_34685628	13.4753	13.4087	14.3216	14.4695	14.2303
GENE234X	Kcnq3	consensus_chr15_62086921_62087198	13.4087	13.3397	14.1256	14.2291	14.1903
GENE326X	Calcr	consensus_chr6_3623904_3624150	13.7513	13.3285	14.2052	14.2985	14.2096
GENE240X	T	consensus_chr17_8408979_8409262	13.45	13.6144	14.5042	14.4738	14.5509
GENE21X	Nrcam	consensus_chr12_44403632_44404236	13.5019	13.6013	14.1641	14.3881	14.6303
GENE137X	Islr2	consensus_chr9_58279246_58279681	13.8583	13.8565	14.2981	14.2092	14.7369
GENE239X	T	consensus_chr17_8389190_8389339	13.3188	13.7209	14.4242	14.272	14.089
GENE439X	Scamp1	consensus_chr13_94321144_94321833	13.1776	13.5152	14.3541	14.2033	13.8597
GENE157X	Eomes	consensus_chr9_118468200_118468630	13.1617	13.495	14.1261	14.5151	13.9807
GENE71X	Itch	consensus_chr2_155115402_155116063	13.176	13.835	14.1607	14.3815	14.1755
GENE383X	Ap3b2	consensus_chr7_81480831_81481312	13.0963	13.8892	13.9851	14.1153	14.072
GENE22X	Nrcam	consensus_chr12_44535560_44536334	12.8245	13.4975	14.0038	14.2246	14.2718
GENE365X	Kras	consensus_chr6_144361308_144361462	13.6519	13.6048	14.1636	14.2662	13.6798
GENE267X	Pkdcc	consensus_chr17_83320515_83320884	13.6281	13.5064	14.2317	14.3112	13.601
GENE177X	Nodal	consensus_chr10_61500857_61500996	13.6556	13.57	14.2545	14.1589	13.5989
GENE394X	Fgfr2	consensus_chr7_130327950_130328203	13.6333	13.7665	14.1865	14.3146	13.6715
GENE309X	Id3	consensus_chr4_138418538_138418779	13.6739	13.6952	14.2144	14.2992	13.6245
GENE232X	Has2	consensus_chr15_56729756_56730065	13.4907	13.7445	14.2765	14.3293	13.722
GENE203X	Hlf	consensus_chr11_90371054_90371268	13.459	13.6402	14.1958	14.345	13.7059
GENE16X	Atf3	consensus_chr1_191190073_191190359	13.5425	13.7064	14.1586	14.2818	13.7758
GENE269X	Kcng3	consensus_chr17_83547624_83548022	13.5229	13.5612	14.3154	14.3644	13.7663
GENE42X	Scd1	consensus_chr19_44474304_44474435	13.427	13.659	14.1648	14.181	13.6604
GENE48X	Fgf8	consensus_chr19_45790984_45791161	13.4874	13.5914	14.1339	14.1771	13.6893
GENE413X	Hes1	consensus_chr16_33605791_33606065	13.4592	13.751	14.1976	14.1603	13.675
GENE438X	Scamp1	consensus_chr13_94242174_94242361	13.4876	13.5741	14.2531	14.1587	13.7873
GENE381X	Rgma	consensus_chr7_73344144_73344284	13.5296	13.5899	14.2132	14.0515	13.6584
GENE104X	Fgf5	consensus_chr5_98283639_98283918	13.447	13.484	14.0708	14.23	13.9662
GENE24X	Dact1	consensus_chr12_71301571_71302020	13.4442	13.4784	14.1505	14.0944	13.9533
GENE465X	Otx2	consensus_chr14_49275422_49275653	13.6138	13.5179	14.1025	14.1058	13.9029
GENE14X	Lefty1	consensus_chr1_181341049_181341199	13.3695	13.5907	14.0098	14.315	13.7968
GENE264X	Pkdcc	consensus_chr17_70900626_70901022	13.3474	13.6074	13.9517	14.28	13.6357
GENE55X	Cd59a	consensus_chr2_104109533_104109799	13.3957	13.4931	14.1023	14.1461	13.476
GENE332X	Mest	consensus_chr6_30711408_30711749	13.3127	13.5084	14.0752	14.1089	13.4786
GENE84X	Dok5	consensus_chr2_170726216_170726396	13.344	13.5588	14.1762	14.1181	13.4188
GENE366X	Kras	consensus_chr6_144373492_144373661	13.3497	13.6116	14.0342	14.1428	13.3801
GENE231X	Has2	consensus_chr15_56708427_56708607	13.4254	13.5712	14.0183	14.0656	13.4094
GENE364X	Kras	consensus_chr6_144273631_144273854	13.299	13.6973	13.9534	14.0357	13.4739
GENE271X	Kcng3	consensus_chr17_83668253_83668509	13.6458	13.736	14.0665	13.9891	13.6257
GENE409X	Hes1	consensus_chr16_30103122_30103289	13.553	13.7472	14.1188	14.0056	13.6188
GENE105X	Fgf5	consensus_chr5_98293510_98293685	13.7029	13.5623	14.0305	14.0185	13.7241
GENE398X	Chst15	consensus_chr7_132360099_132360285	13.564	13.6229	14.1602	14.1639	13.4251
GENE170X	Ddit4	consensus_chr10_59988562_59988702	13.5904	13.478	14.1685	14.2531	13.3605
GENE423X	Pcdh1	consensus_chr18_38278836_38278976	13.5363	13.8171	13.9505	14.1306	13.3839
GENE375X	D7Ertd143e	consensus_chr7_3314282_3314409	13.5531	13.6097	14.0181	14.0636	13.2367
GENE436X	Msx2	consensus_chr13_53455410_53455576	13.7952	13.7619	13.9047	13.9815	13.4288
GENE155X	Eomes	consensus_chr9_118432551_118433292	13.4055	13.4543	14.2639	14.2186	13.5822
GENE91X	Pmepa1	consensus_chr2_173672536_173672892	13.3694	13.5163	14.2608	14.3048	13.4597
GENE31X	Ppp4r4	consensus_chr12_103511464_103511915	13.3969	13.4943	14.198	14.3869	13.614
GENE101X	Grsf1	consensus_chr5_88684336_88684662	13.2847	13.381	14.3492	14.3028	13.6607
GENE156X	Eomes	consensus_chr9_118455982_118456509	13.1287	13.4118	14.1643	14.2437	13.6561
GENE226X	Klf10	consensus_chr15_40955266_40955765	13.0628	13.4455	14.2039	14.1898	13.4564
GENE100X	Grsf1	consensus_chr5_88679333_88679917	13.1959	13.3613	14.2291	14.3526	13.3066
GENE32X	Ppp4r4	consensus_chr12_103564312_103565109	13.3588	13.6937	14.3044	14.2841	13.6609
GENE110X	Tbx3	consensus_chr5_119613558_119613838	13.3936	13.6542	14.2317	14.1286	13.5177
GENE384X	Ap3b2	consensus_chr7_81497209_81497360	13.3782	13.8124	14.4383	14.1821	13.4509
GENE50X	Spc25	consensus_chr2_69150788_69151293	13.1151	13.7303	14.3821	14.4266	13.6362
GENE136X	Kbtbd3	consensus_chr9_4283761_4284275	13.3768	14.0988	13.9486	14.0347	13.5342
GENE165X	Cd24a	consensus_chr10_44392015_44392352	13.2819	14.0069	13.7888	14.1131	13.2287
GENE153X	Eomes	consensus_chr9_118384752_118384964	13.1575	13.3076	13.8947	14.1345	13.0907
GENE320X	Kazn	consensus_chr4_142197117_142197286	13.1833	13.2672	13.6388	14.1108	13.146
GENE228X	Has2	consensus_chr15_54702219_54702825	13.0947	13.044	13.8342	13.944	13.0421
GENE57X	Cd59a	consensus_chr2_104188245_104188452	13.2396	13.0771	13.7111	13.8734	13.0336
GENE469X	Dusp4	consensus_chr8_34732699_34733049	13.3352	13.2738	13.8243	13.5899	13.1516
GENE468X	AK030646	consensus_chr8_4582747_4582992	13.0306	13.4241	13.8365	13.7229	13.1402
GENE135X	Kbtbd3	consensus_chr9_4226971_4227211	12.9564	13.4082	13.7958	13.8611	13.0594
GENE464X	Otx2	consensus_chr14_49155640_49155812	13.0744	13.0591	13.9278	13.8545	13.2018
GENE248X	Gm16386	consensus_chr17_22745725_22746266	13.0251	13.1311	13.8279	13.7324	13.3311
GENE325X	Ski	consensus_chr4_155290432_155291069	12.8085	13.3184	14.1043	13.9517	13.3018
GENE272X	Kcng3	consensus_chr17_83694920_83695176	13.3127	13.347	14.1511	13.9638	13.1595
GENE293X	Cyr61	consensus_chr3_145690958_145691084	13.1661	13.331	14.0839	13.911	13.1659
GENE0X	Spats2l	consensus_chr1_57862138_57862396	13.2157	13.2672	14.0399	13.9653	13.0222
GENE426X	Smad7	consensus_chr18_75353497_75353669	13.3405	13.4503	13.8881	13.958	13.2313
GENE463X	Otx2	consensus_chr14_49089813_49089999	13.2709	13.2742	13.8921	14.0097	13.2079
GENE27X	Dact1	consensus_chr12_71376627_71376890	13.4644	13.3032	14.0852	14.1009	13.0479
GENE429X	Klf6	consensus_chr13_5892395_5892635	13.2573	13.6697	14.1016	14.0676	12.9529
GENE443X	Zmiz1	consensus_chr14_23372059_23372254	13.264	13.6225	13.8682	13.9778	13.1353
GENE386X	Rgma	consensus_chr7_82063489_82063814	13.159	13.4304	14.0972	14.085	13.4133
GENE285X	Bcar3	consensus_chr3_122414149_122414544	13.214	13.4513	13.9872	14.1086	13.4221
GENE99X	Grsf1	consensus_chr5_88670674_88670933	13.1028	13.1888	13.8863	14.0529	13.4109
GENE51X	Spc25	consensus_chr2_69222031_69222562	13.1377	13.3488	13.8933	13.7894	13.5268
GENE20X	Nrcam	consensus_chr12_44393882_44394045	13.3147	13.3277	13.9619	14.0381	13.7189
GENE35X	Gsc	consensus_chr12_104381222_104381480	13.4769	13.3399	13.983	14.0223	13.518
GENE227X	Klf10	consensus_chr15_41162279_41162512	13.384	13.0654	13.8971	13.7387	13.7955
GENE331X	Peg10	consensus_chr6_4855296_4855436	12.8381	13.2	13.7561	13.7593	12.9914
GENE166X	Cd24a	consensus_chr10_44553532_44553939	12.7781	13.1616	13.698	13.7504	12.8438
GENE471X	Efnb1	consensus_chrX_99045496_99045800	12.7921	13.0061	13.6221	13.3345	12.8922
GENE278X	Crabp2	consensus_chr3_86566305_86566532	12.8397	12.7795	13.7927	13.8659	13.1396
GENE475X	Efnb1	consensus_chrX_139345212_139345622	12.7207	12.9979	13.2747	13.425	12.7849
GENE474X	Efnb1	consensus_chrX_139317424_139317594	12.7036	12.9143	13.0401	13.4172	12.9171
GENE472X	Efnb1	consensus_chrX_99152773_99152929	12.9791	13.2905	13.2729	13.2536	12.7104
GENE473X	Efnb1	consensus_chrX_106080918_106081259	12.6596	12.8319	13.2362	13.3398	13.3414
GENE477X	Efnb1	consensus_chrX_145524466_145524856	12.0874	12.398	13.5972	13.3484	12.7793
GENE476X	Efnb1	consensus_chrX_139436747_139436935	11.9305	12.0537	12.8335	13.0029	11.9143
GENE29X	Ubr7	consensus_chr12_102758660_102758816	16.5273	17.1958	16.7443	16.5233	16.9662
GENE30X	Ubr7	consensus_chr12_102758889_102759365	16.5255	17.1996	16.7417	16.521	16.9684
GENE125X	Fzd10	consensus_chr5_128603194_128603404	16.3355	17.2422	16.8153	16.6892	16.8754
GENE356X	Nanog	consensus_chr6_122703628_122704129	16.3773	17.1033	16.7843	16.63	16.5748
GENE355X	Nanog	consensus_chr6_122702403_122702936	16.2156	16.9169	16.6272	16.4461	16.4353
GENE297X	L1td1	consensus_chr4_98726663_98726945	16.3241	16.8077	16.3858	16.3332	16.6723
GENE298X	L1td1	consensus_chr4_98727954_98728510	16.3106	16.8115	16.3809	16.3185	16.6626
GENE371X	Kras	consensus_chr6_145275740_145276846	16.1181	16.5971	16.3209	16.4069	16.6669
GENE370X	Kras	consensus_chr6_145275052_145275342	16.0886	16.552	16.2884	16.4124	16.6345
GENE121X	Fzd10	consensus_chr5_128596830_128597360	16.0111	17.0039	16.3482	16.3262	16.3721
GENE184X	Pik3ip1	consensus_chr11_3292790_3292951	16.8813	17.1701	16.4427	16.0781	16.4283
GENE131X	Radil	consensus_chr5_142821774_142821827	16.9182	17.1907	16.2888	15.9568	16.4507
GENE295X	Jun	consensus_chr4_95052482_95052624	16.5627	17.2784	16.2244	15.9457	16.6155
GENE294X	Jun	consensus_chr4_95052028_95052213	16.5523	17.2786	16.2106	15.9265	16.6146
GENE461X	Otx2	consensus_chr14_48753109_48753424	16.9645	16.9182	16.0693	15.8921	16.4111
GENE462X	Otx2	consensus_chr14_48754197_48754367	16.9081	16.8612	16.0364	15.8354	16.3753
GENE220X	Wnt3	consensus_chr11_103810386_103810439	16.4698	17.3059	16.2611	16.1361	15.9233
GENE218X	Wnt3	consensus_chr11_103808652_103808831	16.4381	17.265	16.1998	16.1586	15.8943
GENE219X	Wnt3	consensus_chr11_103809172_103809552	16.5241	17.3377	16.3019	16.2392	15.9646
GENE251X	Cdkn1a	consensus_chr17_29008194_29008596	16.3669	16.3769	15.9932	15.8479	16.2231
GENE250X	Cdkn1a	consensus_chr17_29007432_29007640	16.3722	16.3846	15.9759	15.8465	16.2136
GENE359X	Slc2a3	consensus_chr6_122742373_122742537	16.3011	16.3526	15.9209	15.7469	16.0469
GENE187X	Irgm1	consensus_chr11_48800410_48800567	16.5279	16.5167	16.1484	15.9436	16.1763
GENE74X	1500012F01Rik	consensus_chr2_167063163_167063368	16.396	16.3527	16.1529	15.9721	16.4119
GENE455X	Otx2	consensus_chr14_48653661_48653928	16.1102	16.2544	16.0894	16.0129	16.4061
GENE456X	Otx2	consensus_chr14_48654960_48655406	16.0486	16.1933	15.9734	15.9288	16.3025
GENE379X	Snurf	consensus_chr7_60007871_60008424	16.5698	16.0552	16.2901	15.8614	16.5982
GENE41X	Neat1	consensus_chr19_5802518_5802790	16.555	16.5527	15.8599	15.6108	16.034
GENE179X	Gpx4	consensus_chr10_80050827_80051622	16.3912	16.6438	15.6359	15.5744	16.1126
GENE180X	Gpx4	consensus_chr10_80053637_80053790	16.5604	16.7597	15.7936	15.8315	16.2993
GENE5X	Sox13	consensus_chr1_133492580_133492862	16.3067	16.95	16.0268	15.9356	16.2585
GENE6X	Sox13	consensus_chr1_133493152_133493749	16.3003	16.94	16.0258	15.9387	16.2408
GENE68X	Id1	consensus_chr2_152736335_152736401	17.7465	17.7668	16.034	16.0372	15.7281
GENE67X	Id1	consensus_chr2_152735131_152735359	17.6471	17.6609	15.8871	15.9037	15.6029
GENE360X	Slc2a3	consensus_chr6_122765209_122765420	17.1772	17.1592	16.635	16.3796	16.692
GENE361X	Slc2a3	consensus_chr6_122766285_122766338	17.1494	17.1244	16.5914	16.3742	16.6419
GENE344X	Gt(ROSA)26Sor	consensus_chr6_113077039_113077254	17.2267	17.2853	16.6346	16.3872	16.8081
GENE352X	Nanog	consensus_chr6_122608433_122608717	17.1773	17.0339	16.6226	16.4549	16.8646
GENE353X	Nanog	consensus_chr6_122609943_122610121	17.1389	16.9841	16.5726	16.3897	16.8193
GENE350X	Phc1	consensus_chr6_122342170_122342533	17.313	17.0638	16.8455	16.5607	17.1423
GENE378X	Snurf	consensus_chr7_60006072_60006972	17.1748	16.5828	16.8037	16.3737	17.0549
GENE81X	Sall4	consensus_chr2_168840268_168840521	17.9965	17.8588	17.3338	16.795	17.3733
GENE82X	Sall4	consensus_chr2_168840980_168841183	17.9109	17.7847	17.2699	16.7258	17.2906
GENE349X	Phc1	consensus_chr6_122340368_122340910	17.6567	17.3963	17.0732	16.8003	17.4085
GENE80X	Sall4	consensus_chr2_168838785_168839141	17.6671	17.5173	16.9655	16.5357	17.0546
GENE257X	Pou5f1	consensus_chr17_35504528_35506015	17.3584	17.9103	17.2771	16.9967	17.5565
GENE256X	Pou5f1	consensus_chr17_35503853_35504299	17.1523	17.6929	17.0751	16.7821	17.3575
GENE10X	Lefty2	consensus_chr1_180890289_180890577	15.6346	17.2117	17.3586	17.1112	17.1439
GENE8X	Lefty2	consensus_chr1_180887934_180889501	15.6203	17.1957	17.3365	17.0961	17.1529
GENE9X	Lefty2	consensus_chr1_180889952_180890153	15.6694	17.2404	17.4003	17.1666	17.1856
GENE287X	Pitx2	consensus_chr3_129214714_129214896	15.4007	17.4197	17.2964	17.0106	17.1827
GENE151X	Tdgf1	consensus_chr9_110947137_110948383	15.4509	17.1618	17.0699	16.9687	17.1496
GENE150X	Tdgf1	consensus_chr9_110946531_110946721	15.3841	17.1187	17.0033	16.8866	17.1338
GENE175X	Nodal	consensus_chr10_61418275_61418474	15.4967	17.1632	16.9291	16.9331	17.1278
GENE176X	Nodal	consensus_chr10_61418888_61419589	15.2105	17.0464	16.8236	16.831	16.9834
GENE288X	Pitx2	consensus_chr3_129216817_129217096	15.7467	17.8337	17.7742	17.4674	17.5237
GENE289X	Pitx2	consensus_chr3_129217178_129217766	15.6426	17.7588	17.7235	17.4025	17.4438
GENE290X	Pitx2	consensus_chr3_129217914_129218115	15.5172	17.6074	17.6092	17.269	17.2821
GENE334X	Trh	consensus_chr6_92246269_92246732	16.4656	17.0225	17.462	17.2188	17.521
GENE335X	Trh	consensus_chr6_92247122_92248225	16.4108	16.9874	17.4184	17.1775	17.478
GENE244X	Spaca6	consensus_chr17_17826709_17826997	15.9704	17.7867	16.9736	16.826	17.4316
GENE246X	Spaca6	consensus_chr17_17827567_17828588	15.9552	17.8037	16.9536	16.8031	17.4629
GENE245X	Spaca6	consensus_chr17_17827285_17827425	15.9864	17.8255	17.0038	16.8533	17.489
GENE243X	Spaca6	consensus_chr17_17825762_17826184	15.7829	17.6107	16.8038	16.6979	17.2746
GENE122X	Fzd10	consensus_chr5_128598418_128598625	16.8381	17.7154	16.7567	16.7424	16.9958
GENE152X	Tdgf1	consensus_chr9_110949302_110949525	15.1729	16.7011	16.6016	16.4182	16.5876
GENE174X	Nodal	consensus_chr10_61415682_61416344	15.2082	16.5566	16.2642	16.2611	16.4856
GENE13X	Lefty1	consensus_chr1_180934401_180935253	14.535	16.6521	16.823	16.5783	16.5136
GENE12X	Lefty1	consensus_chr1_180933629_180934184	14.4819	16.5693	16.7443	16.4989	16.4255
GENE216X	Wnt3	consensus_chr11_103772298_103772452	15.6785	17.2391	16.485	16.3254	16.077
GENE215X	Wnt3	consensus_chr11_103770780_103771467	15.4176	16.9938	16.3543	16.1782	15.861
GENE114X	Setd1b	consensus_chr5_123136547_123137136	18.3094	18.6698	17.7922	17.4437	17.97
GENE117X	Setd1b	consensus_chr5_123140997_123141187	18.244	18.4794	17.6739	17.2453	17.7234
GENE123X	Fzd10	consensus_chr5_128600543_128600829	17.3591	18.2539	17.4804	17.3926	17.6447
GENE124X	Fzd10	consensus_chr5_128601637_128601965	17.2147	18.09	17.3766	17.2604	17.5245
GENE116X	Setd1b	consensus_chr5_123138268_123138554	18.8478	19.163	18.301	17.9358	18.4263
GENE115X	Setd1b	consensus_chr5_123137711_123137959	18.8315	19.1546	18.2954	17.9374	18.4203

## Sheet: H3 K27ac
GID	YORF	NAME	sb	X1hr	X4hr	X8hr	untreated
GENE170X	Ddit4	consensus_chr10_59988562_59988702	14.0183	14.035	14.0526	14.0398	14.0074
GENE354X	Nanog	consensus_chr6_122624641_122624865	13.9882	14.0119	14.1262	14.0226	13.8513
GENE443X	Zmiz1	consensus_chr14_23372059_23372254	13.8206	14.0926	14.0642	14.1451	14.0335
GENE14X	Lefty1	consensus_chr1_181341049_181341199	13.713	14.1408	14.0504	14.0803	13.9527
GENE56X	Cd59a	consensus_chr2_104122629_104122782	13.8203	13.9863	14.0602	14.0775	14.1527
GENE177X	Nodal	consensus_chr10_61500857_61500996	13.8456	13.9448	14.0408	14.0941	14.0098
GENE35X	Gsc	consensus_chr12_104381222_104381480	13.8469	13.8514	14.0491	14.1075	14.1992
GENE365X	Kras	consensus_chr6_144361308_144361462	13.8643	13.777	13.9852	14.1666	14.1108
GENE55X	Cd59a	consensus_chr2_104109533_104109799	13.8387	13.938	14.1213	14.5224	13.9133
GENE364X	Kras	consensus_chr6_144273631_144273854	13.5656	13.7731	14.0969	14.064	14.1264
GENE203X	Hlf	consensus_chr11_90371054_90371268	13.6755	13.7879	13.9661	14.0692	14.0159
GENE227X	Klf10	consensus_chr15_41162279_41162512	13.7246	13.5249	13.9922	13.981	14.0253
GENE104X	Fgf5	consensus_chr5_98283639_98283918	13.7009	13.5369	14.0117	14.1403	14.26
GENE20X	Nrcam	consensus_chr12_44393882_44394045	13.6845	13.4847	13.9529	14.1388	14.3528
GENE267X	Pkdcc	consensus_chr17_83320515_83320884	13.6536	13.5604	14.3163	14.2629	14.0757
GENE309X	Id3	consensus_chr4_138418538_138418779	13.6044	13.6956	14.2175	14.2516	13.9413
GENE424X	Spry4	consensus_chr18_38573819_38574176	14.0474	13.6514	14.1788	14.1594	14.0452
GENE48X	Fgf8	consensus_chr19_45790984_45791161	13.8655	13.9996	14.1968	14.3081	14.3381
GENE260X	Foxp4	consensus_chr17_47953108_47953293	13.8923	14.0306	14.224	14.1508	14.3077
GENE69X	Itch	consensus_chr2_155053130_155053272	14.0588	13.9947	13.9934	14.2311	14.3644
GENE64X	Chac1	consensus_chr2_131152139_131152505	13.8472	13.9917	13.9595	14.2904	14.3336
GENE421X	Egr1	consensus_chr18_34850208_34850354	14.0386	14.2443	14.1406	14.3213	14.2206
GENE402X	Fgf15	consensus_chr7_144888718_144888877	13.832	14.2026	14.1539	14.3677	14.0741
GENE200X	Irf1	consensus_chr11_55438305_55438441	13.7523	14.2338	14.2013	14.1324	14.2641
GENE58X	Lgr4	consensus_chr2_109917143_109917715	13.6754	13.8987	14.2514	14.3611	14.5161
GENE19X	Nrcam	consensus_chr12_44327670_44327856	13.7318	13.9084	14.2069	14.2107	14.4462
GENE91X	Pmepa1	consensus_chr2_173672536_173672892	13.6502	14.0198	14.2501	14.3405	14.2314
GENE269X	Kcng3	consensus_chr17_83547624_83548022	13.8432	13.8862	14.2041	14.289	14.152
GENE59X	Chac1	consensus_chr2_119288567_119288727	14.1884	14.2027	14.202	14.0532	14.2719
GENE168X	Ddit4	consensus_chr10_59957919_59958288	14.0446	14.1435	14.1497	14.1408	14.3917
GENE318X	Kazn	consensus_chr4_142140118_142140268	14.1781	14.108	13.9905	14.089	14.4471
GENE414X	Hes1	consensus_chr16_33737816_33738120	14.1778	14.0721	14.5935	14.4795	14.5019
GENE401X	Fgf15	consensus_chr7_144872813_144872953	14.124	14.0388	14.4973	14.3852	14.631
GENE438X	Scamp1	consensus_chr13_94242174_94242361	14.2627	14.088	14.6293	14.601	14.6578
GENE326X	Calcr	consensus_chr6_3623904_3624150	14.0682	13.9235	14.4949	14.5399	14.9002
GENE465X	Otx2	consensus_chr14_49275422_49275653	14.189	13.7016	14.3208	14.4885	14.6073
GENE137X	Islr2	consensus_chr9_58279246_58279681	14.2266	14.2488	14.3852	14.6324	15.1852
GENE431X	Pxdc1	consensus_chr13_34741702_34742336	14.0621	14.0631	14.2835	14.5513	15.2353
GENE454X	Il17rd	consensus_chr14_27096185_27096406	14.3237	14.245	14.0913	14.5224	14.9437
GENE52X	Sp5	consensus_chr2_70471866_70472314	13.6093	14.3064	14.808	14.3927	13.8397
GENE53X	Sp5	consensus_chr2_70474647_70475140	13.5375	14.3686	14.7495	14.3706	13.7483
GENE149X	Tpm1	consensus_chr9_67105826_67106124	13.7289	14.3469	14.67	14.2858	13.7078
GENE410X	Hes1	consensus_chr16_30129541_30129713	13.8131	14.3869	14.7183	14.5594	13.9526
GENE399X	Chst15	consensus_chr7_132403936_132404243	13.5599	14.5726	14.751	14.1077	13.9306
GENE217X	Wnt3	consensus_chr11_103798585_103798879	13.8118	14.2084	14.43	14.4679	13.7785
GENE119X	Fzd10	consensus_chr5_128579190_128579385	13.7375	14.4068	14.3364	14.2674	13.8408
GENE38X	Gsc	consensus_chr12_104473558_104473733	13.5978	14.2181	14.3049	14.5311	14.146
GENE129X	Radil	consensus_chr5_142800798_142800938	13.556	14.1102	14.2885	14.3653	14.0435
GENE88X	Pmepa1	consensus_chr2_173257969_173258380	13.5435	14.7664	14.6364	14.6939	14.6307
GENE396X	Chst15	consensus_chr7_132317113_132317585	13.5109	14.7286	14.8239	14.5744	14.5577
GENE136X	Kbtbd3	consensus_chr9_4283761_4284275	13.3531	14.625	14.4148	14.4225	14.5039
GENE98X	Shisa3	consensus_chr5_67696783_67697780	13.4088	14.6531	14.4291	14.3895	14.364
GENE32X	Ppp4r4	consensus_chr12_103564312_103565109	13.6884	14.3336	14.539	14.7834	14.5406
GENE197X	Irf1	consensus_chr11_53786762_53787057	13.5529	14.1975	14.4571	14.5892	14.5052
GENE37X	Gsc	consensus_chr12_104470812_104470973	13.5281	14.3917	14.4538	14.8423	14.3232
GENE291X	Pitx2	consensus_chr3_129222436_129222934	12.9794	14.5798	14.9676	14.835	14.2081
GENE23X	Dact1	consensus_chr12_71296373_71297167	13.7854	13.9379	14.5444	14.6461	14.6084
GENE270X	Kcng3	consensus_chr17_83633016_83633583	13.6935	13.702	14.464	14.4383	14.5558
GENE430X	Pxdc1	consensus_chr13_34685053_34685628	13.6187	13.8636	14.4468	14.5926	14.9135
GENE160X	Plekhg1	consensus_chr10_3741224_3742156	13.4493	13.9729	14.6938	14.6908	14.6024
GENE240X	T	consensus_chr17_8408979_8409262	13.3804	13.7398	14.5531	14.7024	14.6339
GENE103X	Fgf5	consensus_chr5_98255741_98256081	13.4811	13.3714	14.3981	14.4639	14.7845
GENE234X	Kcnq3	consensus_chr15_62086921_62087198	13.3313	13.4986	14.2331	14.5845	14.6428
GENE24X	Dact1	consensus_chr12_71301571_71302020	13.6011	13.5653	14.397	14.6283	14.3305
GENE31X	Ppp4r4	consensus_chr12_103511464_103511915	13.4947	13.8069	14.2668	14.6019	14.1129
GENE439X	Scamp1	consensus_chr13_94321144_94321833	13.1073	13.9624	14.3268	14.4903	14.3536
GENE51X	Spc25	consensus_chr2_69222031_69222562	13.0635	13.6871	14.2608	14.3155	14.1976
GENE383X	Ap3b2	consensus_chr7_81480831_81481312	12.9675	13.9887	14.0675	14.1871	14.3043
GENE36X	Gsc	consensus_chr12_104466887_104467386	13.0078	13.9921	14.0789	14.5747	13.9861
GENE71X	Itch	consensus_chr2_155115402_155116063	13.1402	14.1993	14.2839	14.8532	14.7885
GENE22X	Nrcam	consensus_chr12_44535560_44536334	12.9586	13.6331	14.4799	14.8	15.1255
GENE279X	Crabp2	consensus_chr3_87891547_87891945	13.885	14.4555	14.3425	14.3795	14.3015
GENE409X	Hes1	consensus_chr16_30103122_30103289	13.8528	14.3478	14.3811	14.3642	14.3035
GENE313X	Epha2	consensus_chr4_140131460_140131654	13.7645	14.3436	14.4994	14.3369	14.3115
GENE342X	Gt(ROSA)26Sor	consensus_chr6_108644376_108644559	13.8686	14.2619	14.3919	14.5346	14.4843
GENE264X	Pkdcc	consensus_chr17_70900626_70901022	13.926	14.2306	14.2501	14.4809	14.4159
GENE109X	Taok3	consensus_chr5_117135600_117135895	14.1247	14.2106	14.3471	14.3708	14.5183
GENE118X	Setd1b	consensus_chr5_123245570_123245742	14.0684	14.0902	14.286	14.3201	14.3814
GENE72X	Itch	consensus_chr2_155133455_155133700	13.9928	14.3681	14.272	14.2045	14.4639
GENE311X	Id3	consensus_chr4_138453360_138453557	14.0252	14.3252	14.1297	14.2979	14.398
GENE92X	Msx1	consensus_chr5_37768802_37769120	14.2134	14.0307	14.3634	14.4908	14.3516
GENE346X	Cxcl12	consensus_chr6_115287121_115287449	14.0602	14.1338	14.3317	14.5967	14.2191
GENE338X	Trh	consensus_chr6_92513869_92514072	14.0643	14.3033	14.4959	14.5617	14.1293
GENE231X	Has2	consensus_chr15_56708427_56708607	13.9419	14.3338	14.5224	14.4946	14.2488
GENE343X	Gt(ROSA)26Sor	consensus_chr6_108696365_108696528	14.1516	14.4366	14.5771	14.6678	14.1272
GENE391X	Relt	consensus_chr7_100861981_100862442	14.0719	14.6274	14.2723	14.5548	14.368
GENE303X	Id3	consensus_chr4_135963498_135963678	14.5069	14.4426	14.3431	14.4009	14.5194
GENE407X	AK013883	consensus_chr16_8829488_8829637	14.3737	14.5059	14.3422	14.3227	14.6392
GENE154X	Eomes	consensus_chr9_118389946_118390214	14.2955	14.4789	14.2871	14.504	14.5132
GENE387X	Wnt11	consensus_chr7_90457101_90457275	14.3508	14.332	14.2755	14.3652	14.4202
GENE2X	Spats2l	consensus_chr1_59448450_59448696	14.4066	14.3948	14.5276	14.5019	14.5222
GENE39X	Gsc	consensus_chr12_111664282_111664372	14.1656	14.7113	14.4255	14.127	14.2334
GENE223X	Socs3	consensus_chr11_117941914_117942039	14.0388	14.5762	14.3317	14.2366	14.2075
GENE140X	Tle3	consensus_chr9_61324251_61324332	14.0384	14.6406	14.5029	14.2593	14.3817
GENE148X	Tle3	consensus_chr9_61445921_61446061	14.3446	14.4759	14.7242	14.3316	14.3362
GENE221X	Wnt3	consensus_chr11_103840947_103841240	14.2641	14.4276	14.4701	14.1876	14.1462
GENE336X	Trh	consensus_chr6_92364805_92364976	14.0016	14.094	14.3986	14.3752	14.0715
GENE310X	Id3	consensus_chr4_138444922_138445231	13.9215	14.1688	14.4558	14.2546	14.0731
GENE275X	Zfp36l2	consensus_chr17_84177535_84177714	14.0978	14.2647	14.4878	14.2946	14.0751
GENE271X	Kcng3	consensus_chr17_83668253_83668509	14.1038	14.1274	14.2991	14.2083	14.1646
GENE60X	Chac1	consensus_chr2_119304534_119304780	14.0106	14.0339	14.2714	14.2369	14.1859
GENE380X	D7Ertd715e	consensus_chr7_62420131_62420290	14.3374	14.0496	14.4697	14.084	14.1742
GENE296X	Jun	consensus_chr4_95134823_95135014	14.3483	14.3516	14.3873	14.3727	13.7886
GENE447X	Zmiz1	consensus_chr14_25448611_25448840	14.1819	14.1215	14.4141	14.3779	13.9059
GENE408X	Hes1	consensus_chr16_30062944_30063357	14.3096	14.7568	13.9411	14.1788	14.3361
GENE40X	Gsc	consensus_chr12_111672141_111672473	14.391	14.7025	14.0793	13.9926	14.2655
GENE324X	Ski	consensus_chr4_155249806_155250010	14.1397	14.5751	14.0996	14.0709	14.2072
GENE61X	Chac1	consensus_chr2_119351226_119351442	14.5332	14.4018	14.0645	13.8625	13.9786
GENE17X	Rhob	consensus_chr12_8402085_8402511	14.2862	15.0273	14.4465	14.2542	13.9834
GENE130X	Radil	consensus_chr5_142812838_142813177	14.0088	14.8516	14.2954	14.2977	14.0144
GENE404X	AK013883	consensus_chr16_8769190_8769359	14.1742	14.449	14.5673	14.5035	14.7423
GENE202X	Hlf	consensus_chr11_90356160_90356329	14.1394	14.4494	14.4898	14.426	14.6493
GENE312X	Epha2	consensus_chr4_140126698_140126946	13.9376	14.5415	14.5381	14.557	14.6277
GENE196X	Irf1	consensus_chr11_53781310_53781506	14.152	14.6724	14.6642	14.5844	14.4679
GENE255X	Pou5f1	consensus_chr17_35485810_35485956	14.3087	14.6364	14.656	14.5968	14.8736
GENE28X	Ubr7	consensus_chr12_102702435_102702575	14.3315	14.5175	14.5013	14.6085	14.7843
GENE286X	Bcar3	consensus_chr3_122434049_122434426	14.1704	14.5402	14.6578	14.5813	15.0132
GENE194X	Irgm1	consensus_chr11_48871235_48871651	14.0654	14.6091	15.0235	14.7437	14.4271
GENE86X	Dok5	consensus_chr2_170887653_170887870	13.9881	14.2862	15.0875	14.7009	14.4251
GENE232X	Has2	consensus_chr15_56729756_56730065	14.1481	14.2237	14.9747	14.9352	14.5728
GENE406X	AK013883	consensus_chr16_8788044_8788566	13.8236	14.5128	14.7752	14.7562	14.7794
GENE282X	AK040741	consensus_chr3_89800149_89800499	13.7811	14.3737	14.8678	14.6419	14.7007
GENE186X	Xbp1	consensus_chr11_5562956_5563289	13.8813	14.3912	14.6921	14.6744	14.6045
GENE138X	Islr2	consensus_chr9_58295776_58296231	14.2286	15.0677	14.7079	14.4898	14.6796
GENE317X	Epha2	consensus_chr4_141338992_141339132	14.3229	14.9349	14.6109	14.3397	14.4734
GENE185X	Pik3ip1	consensus_chr11_3337600_3338123	14.3301	15.2848	15.0169	14.656	14.3503
GENE449X	Il17rd	consensus_chr14_25718331_25718953	14.2875	14.5665	14.9009	14.6879	15.1193
GENE132X	Radil	consensus_chr5_142881399_142881695	14.2569	14.5427	14.7865	14.8038	15.0538
GENE337X	Trh	consensus_chr6_92469737_92470184	14.2752	14.605	14.9755	14.8094	14.9229
GENE208X	Rara	consensus_chr11_98925815_98926131	14.4151	14.6784	14.8193	14.7653	15.2575
GENE450X	Il17rd	consensus_chr14_27039338_27039517	14.2238	14.7075	14.9679	14.9705	15.2201
GENE198X	Irf1	consensus_chr11_53799980_53800464	14.1854	14.7811	14.9794	14.9916	15.0888
GENE327X	Calcr	consensus_chr6_3677836_3678529	14.018	14.7365	14.827	14.8837	15.2587
GENE207X	Mllt6	consensus_chr11_97661653_97662273	14.467	14.9726	14.8442	14.7861	14.9479
GENE405X	AK013883	consensus_chr16_8778570_8779080	14.3055	14.844	14.8713	14.7942	15.0328
GENE428X	Smad7	consensus_chr18_75366741_75367245	14.3717	15.1281	14.8437	14.8537	15.108
GENE319X	Kazn	consensus_chr4_142166133_142166914	14.071	14.8511	14.5181	14.7874	15.3231
GENE390X	Wnt11	consensus_chr7_98840585_98841145	14.2843	14.3201	14.7079	15.1775	15.1019
GENE420X	Wnt8a	consensus_chr18_34555243_34555601	14.109	14.341	14.7865	15.0037	15.0728
GENE444X	Zmiz1	consensus_chr14_23774570_23774832	14.3268	14.4109	14.7954	14.9077	14.9426
GENE63X	Chac1	consensus_chr2_126523532_126523676	14.2643	14.5037	14.6431	14.9422	14.9705
GENE307X	Id3	consensus_chr4_138361509_138362033	14.0006	14.4159	14.8261	14.8339	14.8871
GENE249X	Dusp1	consensus_chr17_26511210_26511798	13.9992	14.3398	14.7342	14.8314	14.9693
GENE62X	Chac1	consensus_chr2_126521591_126521758	14.1423	14.3995	14.5806	14.8459	14.8339
GENE417X	Wnt8a	consensus_chr18_34542264_34542435	14.152	14.2593	14.611	14.7326	14.9214
GENE193X	Irgm1	consensus_chr11_48856851_48857129	14.6325	14.3967	14.7868	14.9995	15.1737
GENE192X	Irgm1	consensus_chr11_48853597_48853755	14.6148	14.2982	14.6965	14.9201	15.1751
GENE25X	Dact1	consensus_chr12_71369195_71369340	14.4281	14.808	15.2292	15.0707	14.8762
GENE26X	Dact1	consensus_chr12_71369922_71370116	14.4393	14.7811	15.2249	15.0556	14.8269
GENE345X	Cxcl12	consensus_chr6_115252107_115252377	14.4894	14.8976	15.1028	15.0373	14.9757
GENE262X	Pkdcc	consensus_chr17_70755079_70755371	14.4689	14.7794	15.073	14.8061	15.026
GENE322X	Ski	consensus_chr4_155189613_155190201	14.171	14.9192	15.0106	15.1345	14.9791
GENE412X	Hes1	consensus_chr16_30160400_30160832	14.1623	14.6464	14.9632	15.1849	14.9088
GENE403X	Fgf15	consensus_chr7_144898506_144898931	14.0416	14.9929	15.0197	14.866	14.9372
GENE323X	Ski	consensus_chr4_155191953_155192422	13.9958	14.7418	14.8806	15.0072	14.8033
GENE283X	AK040741	consensus_chr3_89836176_89836827	14.41	14.5429	14.8764	14.7288	14.6732
GENE284X	AK040741	consensus_chr3_89836907_89837218	14.4153	14.5148	14.859	14.6927	14.6434
GENE224X	Socs3	consensus_chr11_117972755_117973060	14.3658	14.6809	14.8564	14.5683	14.5766
GENE368X	Kras	consensus_chr6_145252001_145252289	14.4968	14.8596	14.8959	14.9576	14.711
GENE120X	Fzd10	consensus_chr5_128593379_128593636	14.3463	14.8652	14.9706	14.8783	14.4088
GENE411X	Hes1	consensus_chr16_30155736_30156494	14.0369	14.7274	15.2275	15.3331	15.3325
GENE108X	Taok3	consensus_chr5_117121502_117122157	13.9836	14.7593	15.0562	15.235	15.4184
GENE1X	Spats2l	consensus_chr1_57890161_57890956	13.8238	14.6804	15.4728	15.396	15.2722
GENE46X	Fgf8	consensus_chr19_45745737_45746430	14.198	14.6702	15.3126	15.6083	15.1941
GENE83X	Dok5	consensus_chr2_170657559_170658226	14.238	14.5826	15.1797	15.2738	15.1807
GENE44X	Fgf8	consensus_chr19_45740924_45741066	13.7908	14.5301	14.8687	15.1949	14.6242
GENE43X	Fgf8	consensus_chr19_45733065_45733956	13.7172	14.2542	14.8783	15.178	14.918
GENE389X	Wnt11	consensus_chr7_98837807_98838124	14.1338	14.211	14.4199	14.9187	14.6792
GENE339X	Trh	consensus_chr6_97063168_97063423	13.8761	14.0936	14.5406	14.9498	14.3931
GENE73X	1500012F01Rik	consensus_chr2_167058802_167059178	13.9106	13.9741	14.7908	15.0496	15.2498
GENE21X	Nrcam	consensus_chr12_44403632_44404236	13.7617	14.1869	14.457	14.973	15.3245
GENE173X	Nodal	consensus_chr10_61405952_61406482	13.5379	14.61	14.9945	15.0409	14.9627
GENE265X	Pkdcc	consensus_chr17_83166332_83167152	13.4717	14.4003	14.8806	14.9215	14.9757
GENE427X	Smad7	consensus_chr18_75360801_75361429	13.6522	14.6278	14.7768	14.9779	15.1382
GENE90X	Pmepa1	consensus_chr2_173339932_173340353	13.3097	14.8135	14.7593	14.9131	14.8644
GENE11X	Lefty1	consensus_chr1_180924394_180925384	13.0121	15.2197	15.4415	15.2371	15.2921
GENE89X	Pmepa1	consensus_chr2_173334398_173335678	13.2535	14.8487	15.2439	15.3368	15.2839
GENE162X	Plekhg1	consensus_chr10_3941333_3941499	14.8825	14.8752	14.6792	14.4712	14.9409
GENE188X	Irgm1	consensus_chr11_48818441_48818699	14.7745	14.861	14.7818	14.578	14.8253
GENE281X	Crabp2	consensus_chr3_87974317_87974567	14.7716	15.0381	14.7796	14.7682	15.064
GENE301X	Fhl3	consensus_chr4_124708779_124709208	15.0981	15.1004	14.5824	14.7391	14.8155
GENE446X	Zmiz1	consensus_chr14_25377943_25378083	14.8544	15.2654	14.8837	14.7417	14.7615
GENE146X	Tle3	consensus_chr9_61372345_61372498	14.9272	15.0413	14.936	14.4818	14.7175
GENE70X	Itch	consensus_chr2_155074251_155074431	14.615	14.6956	14.6241	14.7009	14.8617
GENE169X	Ddit4	consensus_chr10_59962644_59962885	14.6192	14.6845	14.5702	14.6236	14.9439
GENE171X	Unc5b	consensus_chr10_60793113_60793280	14.5317	14.8034	14.6877	14.6068	14.9732
GENE280X	Crabp2	consensus_chr3_87970999_87971247	14.6159	14.8485	14.6421	14.5802	14.6825
GENE304X	Id3	consensus_chr4_136031505_136031958	14.9217	14.6532	14.7279	14.5205	15.149
GENE266X	Pkdcc	consensus_chr17_83214236_83214528	14.6501	14.6646	14.5869	14.559	14.7048
GENE388X	Wnt11	consensus_chr7_98815460_98815615	14.549	14.6927	14.5145	14.6459	14.6958
GENE201X	Irf1	consensus_chr11_55461054_55461179	14.5555	14.5259	14.5914	14.6699	14.6641
GENE300X	Slc2a1	consensus_chr4_119108741_119108988	14.6727	14.7746	14.5365	14.3852	14.6033
GENE400X	Phlda2	consensus_chr7_143467822_143467974	14.6372	14.6698	14.5551	14.4437	14.3908
GENE395X	Chst15	consensus_chr7_132247588_132247876	14.6355	14.5321	14.3745	14.3005	14.7722
GENE178X	Gpx4	consensus_chr10_79988724_79988849	14.8143	14.8096	14.3719	14.3692	14.4261
GENE225X	Klf10	consensus_chr15_38300483_38300665	14.7587	14.8181	14.2627	14.3316	14.6004
GENE448X	Il17rd	consensus_chr14_25607054_25607197	14.527	14.7894	14.1928	14.249	14.4952
GENE470X	Dusp4	consensus_chr8_34805012_34805408	15.0982	14.9053	14.541	14.4019	14.7784
GENE330X	Peg10	consensus_chr6_4747369_4747494	15.0358	14.9102	14.4811	14.5139	14.7393
GENE147X	Tle3	consensus_chr9_61385167_61385319	15.1216	14.8891	14.6453	14.4975	14.8512
GENE66X	Trib3	consensus_chr2_152396579_152396712	14.9953	14.8624	14.3384	14.3874	14.8611
GENE167X	Ddit4	consensus_chr10_59951664_59951902	15.197	15.2454	14.456	14.141	14.8373
GENE382X	Rgma	consensus_chr7_73399519_73399721	15.2404	14.8157	14.8329	14.5594	14.5152
GENE422X	Pcdh1	consensus_chr18_38210652_38210850	14.872	14.9426	14.5666	14.458	14.5253
GENE127X	Lfng	consensus_chr5_140611995_140612157	15.0054	15.0641	14.6679	14.1569	14.4386
GENE247X	Zfp947	consensus_chr17_22118750_22119104	14.893	14.6888	14.4441	14.2059	14.4198
GENE292X	Cyr61	consensus_chr3_145649846_145649978	14.8946	14.9362	14.3937	14.09	14.2229
GENE433X	Gadd45g	consensus_chr13_51845953_51846130	15.2884	15.2706	14.0275	13.9387	14.0812
GENE434X	Gadd45g	consensus_chr13_51846534_51846659	15.281	15.2627	13.9895	13.8664	14.1162
GENE393X	Fgfr2	consensus_chr7_130264662_130264897	15.0215	15.1851	14.3221	14.017	13.9899
GENE241X	Dll1	consensus_chr17_15380676_15380801	15.5219	15.3235	14.8058	14.7838	15.0751
GENE242X	Dll1	consensus_chr17_15380813_15380866	15.5035	15.3132	14.8065	14.786	15.0764
GENE458X	Otx2	consensus_chr14_48700916_48701209	15.3979	15.3626	14.772	14.6593	14.8785
GENE126X	Lfng	consensus_chr5_140583969_140584286	15.5708	15.6994	14.8967	14.7745	14.8755
GENE306X	Id3	consensus_chr4_136140369_136140581	15.4615	15.5111	14.7915	14.6097	14.5743
GENE113X	Tbx3	consensus_chr5_119709831_119709975	15.6967	16.0146	15.0568	14.8357	14.2349
GENE18X	Id2	consensus_chr12_25098494_25098699	15.8384	15.8141	14.7071	14.5303	14.4554
GENE47X	Fgf8	consensus_chr19_45783535_45783679	15.0364	15.2045	14.9816	14.9124	15.1583
GENE305X	Id3	consensus_chr4_136053302_136053447	15.0647	15.1484	14.952	14.9274	15.1142
GENE95X	Smim14	consensus_chr5_65391226_65391539	15.0785	15.2154	15.0385	14.888	15.0643
GENE7X	Lefty2	consensus_chr1_180850818_180850959	15.1489	15.1448	14.9812	14.8954	15.1555
GENE211X	Zfp385c	consensus_chr11_100619643_100619808	15.1032	15.2919	14.9317	14.968	15.0736
GENE65X	Insm1	consensus_chr2_146302378_146302639	15.279	15.1057	14.8455	14.8149	15.0052
GENE4X	Sox13	consensus_chr1_133397576_133398068	15.1689	15.2387	14.7771	14.8197	15.0227
GENE328X	Peg10	consensus_chr6_4736810_4736968	15.2562	15.4006	15.0726	15.0131	15.0028
GENE367X	Kras	consensus_chr6_144454403_144454693	15.1349	15.35	15.0125	14.8325	14.9405
GENE442X	Zmiz1	consensus_chr14_19585336_19585509	15.0976	15.0892	15.0258	14.8058	15.0074
GENE75X	Sall4	consensus_chr2_168761948_168762206	15.0198	14.9617	15.0064	14.8601	15.069
GENE363X	Kras	consensus_chr6_144251210_144251401	14.8459	15.0144	15.2006	14.9245	14.8926
GENE3X	Igfbp2	consensus_chr1_72805935_72806628	14.7734	15.2632	15.0396	14.9646	15.1823
GENE261X	Pkdcc	consensus_chr17_70737468_70737608	14.8902	15.1188	15.0081	14.9061	15.0874
GENE259X	Foxp4	consensus_chr17_47887305_47887876	14.6815	15.2492	14.9344	14.79	15.1908
GENE209X	Rara	consensus_chr11_98960001_98960202	15.0428	15.4904	14.8518	14.7788	15.1718
GENE372X	D7Ertd143e	consensus_chr7_3206524_3206886	15.1086	15.2162	14.7989	14.8338	15.2459
GENE210X	Zfp385c	consensus_chr11_100527735_100527924	15.1945	15.1695	15.0936	15.0762	15.2661
GENE268X	Kcng3	consensus_chr17_83526238_83526490	15.0862	15.1505	15.0753	15.1044	15.2439
GENE164X	Cd24a	consensus_chr10_43551585_43551877	15.158	15.1507	15.1274	14.9919	15.3862
GENE214X	Zfp385c	consensus_chr11_100713769_100714028	15.2001	15.0514	15.1809	15.2346	15.3265
GENE258X	Pou5f1	consensus_chr17_35548650_35548879	14.9259	15.1223	15.2117	15.1214	15.321
GENE425X	Spry4	consensus_chr18_38635944_38636200	15.2246	15.0414	15.0548	15.1583	15.5799
GENE163X	Cd24a	consensus_chr10_43481135_43481437	14.9619	14.8856	14.8511	15.0314	15.5346
GENE362X	Ccnd2	consensus_chr6_127106877_127107026	14.6886	14.7878	14.7786	14.9973	15.1105
GENE161X	Plekhg1	consensus_chr10_3851942_3852301	14.7246	14.7614	14.9298	14.8431	15.0908
GENE191X	Irgm1	consensus_chr11_48834252_48834529	14.6807	14.6008	14.9256	15.0173	14.9534
GENE190X	Irgm1	consensus_chr11_48833788_48834058	14.663	14.6173	14.8921	15.0076	14.9517
GENE182X	Dusp6	consensus_chr10_99170969_99171036	14.765	14.8592	15.0332	15.0603	14.8856
GENE181X	Dusp6	consensus_chr10_99170741_99170917	14.7757	14.849	15.0022	15.0629	14.8788
GENE321X	Gm13247	consensus_chr4_146498084_146498487	14.8569	14.8846	15.008	15.2381	14.8866
GENE230X	Has2	consensus_chr15_56627608_56627951	14.8232	14.9981	15.5089	15.2257	15.0478
GENE229X	Has2	consensus_chr15_56626464_56626771	14.8802	14.9759	15.4868	15.1794	15.0208
GENE445X	Zmiz1	consensus_chr14_23778040_23778573	14.6142	14.7664	15.1667	15.3782	15.4615
GENE369X	Kras	consensus_chr6_145261829_145262239	14.5229	14.9633	15.2932	15.1954	15.2533
GENE97X	Shisa3	consensus_chr5_67632834_67634059	14.4179	15.2058	15.0404	15.232	15.4197
GENE316X	Epha2	consensus_chr4_141291432_141292027	14.3551	15.4266	15.2758	15.0875	15.1056
GENE34X	Ppp4r4	consensus_chr12_103600388_103600857	14.3605	15.22	15.7222	15.8378	16.179
GENE33X	Ppp4r4	consensus_chr12_103599158_103599646	14.3342	15.2133	15.7498	15.817	16.1996
GENE87X	Pmepa1	consensus_chr2_173238334_173239057	14.082	15.2162	15.4972	15.5687	16.0774
GENE159X	Eomes	consensus_chr9_118487571_118487804	14.196	14.6393	15.4648	15.6165	15.8344
GENE158X	Eomes	consensus_chr9_118486783_118487207	14.1831	14.6081	15.3918	15.602	15.7879
GENE347X	Cxcl12	consensus_chr6_117151734_117152782	14.031	14.7096	15.39	16.0273	15.9245
GENE107X	Fgf5	consensus_chr5_98312032_98312336	14.4858	14.957	15.2082	15.5861	15.6931
GENE106X	Fgf5	consensus_chr5_98310053_98310554	14.4564	14.8467	15.2151	15.5113	15.6758
GENE418X	Wnt8a	consensus_chr18_34549061_34549615	14.5897	14.6433	15.4063	15.5706	15.8026
GENE419X	Wnt8a	consensus_chr18_34551614_34552178	14.8923	14.9637	15.5749	15.7592	16.0007
GENE376X	Nphs1os	consensus_chr7_30463526_30464004	14.3276	15.0733	15.6551	15.5688	15.5776
GENE377X	Nphs1os	consensus_chr7_30464066_30464241	14.3084	15.0534	15.658	15.5861	15.5873
GENE45X	Fgf8	consensus_chr19_45743469_45743630	14.2241	14.9945	15.5222	15.9373	15.2901
GENE128X	Radil	consensus_chr5_142546212_142546943	14.2395	15.5653	15.7443	15.5458	15.5013
GENE459X	Otx2	consensus_chr14_48707986_48708322	15.218	15.4237	15.2062	15.2302	15.3478
GENE460X	Otx2	consensus_chr14_48709413_48709626	15.1889	15.4259	15.1842	15.1979	15.3423
GENE183X	Dusp6	consensus_chr10_99261290_99261430	15.2431	15.4875	15.1081	15.0738	15.297
GENE233X	Has2	consensus_chr15_56742758_56743078	15.0336	15.4141	15.1526	15.1416	15.1799
GENE329X	Peg10	consensus_chr6_4739948_4740139	15.3273	15.3782	15.126	15.2264	15.0901
GENE373X	D7Ertd143e	consensus_chr7_3213628_3213837	15.4713	15.6354	15.3043	15.263	15.5442
GENE252X	Cdkn1a	consensus_chr17_29032640_29032874	15.4354	15.5003	15.2883	15.1696	15.5046
GENE374X	D7Ertd143e	consensus_chr7_3217652_3217973	15.3455	15.4387	15.1525	15.1876	15.5261
GENE263X	Pkdcc	consensus_chr17_70772484_70772902	15.3645	15.2929	15.2698	15.128	15.465
GENE133X	Radil	consensus_chr5_142906533_142906819	15.4536	15.4052	15.0806	14.9578	15.28
GENE79X	Sall4	consensus_chr2_168791141_168791428	15.353	15.4925	14.9767	14.8564	15.1032
GENE299X	Slc2a1	consensus_chr4_119026459_119026723	15.6263	15.4782	15.2606	14.8321	14.9517
GENE222X	Socs3	consensus_chr11_117879734_117879991	15.6555	15.528	15.4649	15.3747	15.691
GENE351X	Phc1	consensus_chr6_122366465_122366649	15.5382	15.3978	15.3786	15.4786	15.715
GENE74X	1500012F01Rik	consensus_chr2_167063163_167063368	15.4437	15.4804	15.6217	15.6751	15.7686
GENE273X	Zfp36l2	consensus_chr17_84149377_84149961	15.6366	15.6417	15.6517	15.4112	15.5134
GENE274X	Zfp36l2	consensus_chr17_84152415_84152592	15.4719	15.5134	15.6623	15.4024	15.4183
GENE172X	Unc5b	consensus_chr10_60814586_60815057	15.8227	16.0413	15.5529	15.5223	15.6046
GENE41X	Neat1	consensus_chr19_5802518_5802790	15.9151	15.9246	15.5083	15.4072	15.6334
GENE457X	Otx2	consensus_chr14_48662913_48663201	15.781	15.8415	15.2973	15.3883	15.6175
GENE85X	Dok5	consensus_chr2_170772037_170772607	15.7095	15.9178	15.5142	15.4296	15.2242
GENE212X	Zfp385c	consensus_chr11_100673015_100673393	15.0435	15.4378	15.4558	15.7407	15.6957
GENE213X	Zfp385c	consensus_chr11_100674104_100674553	15.0489	15.4277	15.4392	15.7199	15.6748
GENE96X	Smim14	consensus_chr5_65525609_65526464	15.196	15.6227	15.4285	15.4815	15.7372
GENE453X	Il17rd	consensus_chr14_27066406_27066795	15.0023	15.1595	15.3808	15.4064	15.7157
GENE144X	Tle3	consensus_chr9_61367852_61368066	15.2111	15.5707	15.8387	15.371	15.1856
GENE145X	Tle3	consensus_chr9_61368182_61368412	15.1753	15.5418	15.8135	15.3432	15.1475
GENE143X	Tle3	consensus_chr9_61367314_61367492	15.0461	15.4654	15.6967	15.2558	15.0303
GENE78X	Sall4	consensus_chr2_168782911_168783312	15.2283	15.3595	15.4545	15.4129	15.2204
GENE235X	Myc	consensus_chr15_65926152_65926942	14.724	15.4893	15.8432	15.5857	15.864
GENE195X	Irf1	consensus_chr11_53759684_53760389	14.7325	15.6602	15.4855	15.5836	15.6914
GENE302X	Ago1	consensus_chr4_126465731_126466196	14.9215	15.9437	15.5189	15.5429	16.0362
GENE314X	Epha2	consensus_chr4_141284266_141284408	15.1372	16.1555	16.0451	15.9589	15.9904
GENE315X	Epha2	consensus_chr4_141284518_141284750	15.1284	16.1463	16.0476	15.9424	15.9645
GENE125X	Fzd10	consensus_chr5_128603194_128603404	15.1845	16.1202	15.8865	15.9917	16.0701
GENE467X	AK030646	consensus_chr8_4436476_4436884	15.2503	15.8368	15.8703	15.8097	16.3531
GENE466X	AK030646	consensus_chr8_4436040_4436209	15.2171	15.8238	15.8479	15.771	16.3148
GENE452X	Il17rd	consensus_chr14_27044889_27045392	15.0586	15.8322	16.2362	16.3286	16.3797
GENE451X	Il17rd	consensus_chr14_27044304_27044591	15.0306	15.7963	16.1941	16.3093	16.3692
GENE174X	Nodal	consensus_chr10_61415682_61416344	14.7557	16.0433	16.2543	16.1021	16.4539
GENE176X	Nodal	consensus_chr10_61418888_61419589	14.6467	16.2733	16.4168	16.3045	16.7196
GENE287X	Pitx2	consensus_chr3_129214714_129214896	14.4603	16.1474	16.5564	16.508	16.4109
GENE237X	T	consensus_chr17_8376105_8376842	14.4004	15.4939	16.5014	16.3447	16.1194
GENE236X	T	consensus_chr17_8375801_8376001	14.42	15.4337	16.4792	16.3163	16.0956
GENE238X	T	consensus_chr17_8377276_8377422	14.1868	15.2683	16.3589	16.1788	16.0103
GENE13X	Lefty1	consensus_chr1_180934401_180935253	13.8292	16.0933	16.4122	16.2012	16.1391
GENE12X	Lefty1	consensus_chr1_180933629_180934184	13.7878	16.0983	16.3635	16.1734	16.1181
GENE216X	Wnt3	consensus_chr11_103772298_103772452	14.817	16.3455	16.0376	15.9527	15.1528
GENE215X	Wnt3	consensus_chr11_103770780_103771467	14.7093	16.2239	15.9853	15.8427	15.0307
GENE76X	Sall4	consensus_chr2_168777065_168777396	15.6539	15.9017	15.6275	15.5676	15.7701
GENE187X	Irgm1	consensus_chr11_48800410_48800567	15.6942	15.8092	15.6234	15.561	15.8116
GENE359X	Slc2a3	consensus_chr6_122742373_122742537	15.7833	15.8025	15.669	15.5616	15.7523
GENE251X	Cdkn1a	consensus_chr17_29008194_29008596	15.6918	15.7467	15.5293	15.6615	15.8922
GENE250X	Cdkn1a	consensus_chr17_29007432_29007640	15.6878	15.7316	15.5175	15.6474	15.8948
GENE295X	Jun	consensus_chr4_95052482_95052624	15.6553	16.0461	15.5674	15.5179	15.8584
GENE294X	Jun	consensus_chr4_95052028_95052213	15.6286	16.0191	15.5341	15.4812	15.8512
GENE77X	Sall4	consensus_chr2_168780159_168780342	15.8962	16.0186	15.9472	15.8616	15.9388
GENE131X	Radil	consensus_chr5_142821774_142821827	15.8962	16.0751	15.7309	15.5681	15.8059
GENE358X	Nanog	consensus_chr6_122715788_122716411	15.5197	15.8198	15.8196	15.9315	16.0414
GENE333X	Abcg2	consensus_chr6_58595576_58595877	15.6503	15.849	15.7139	15.8903	15.9585
GENE277X	Skil	consensus_chr3_31089484_31089609	15.6555	15.8995	15.4471	15.7165	16.3361
GENE276X	Skil	consensus_chr3_31087364_31087512	15.6049	15.7638	15.4008	15.6897	16.2574
GENE184X	Pik3ip1	consensus_chr11_3292790_3292951	16.2023	16.4679	15.8793	15.5691	15.9272
GENE348X	Cxcl12	consensus_chr6_117180164_117180610	16.3109	16.1456	15.7561	15.5607	15.7908
GENE179X	Gpx4	consensus_chr10_80050827_80051622	16.0557	16.2557	15.5194	15.3966	16.0585
GENE180X	Gpx4	consensus_chr10_80053637_80053790	15.9865	16.1228	15.5183	15.3828	16.0402
GENE415X	Hes1	consensus_chr16_33844391_33844583	16.0692	16.1939	16.0433	16.0004	16.3505
GENE416X	Hes1	consensus_chr16_33845586_33845726	16.0078	16.1597	15.9773	15.9611	16.2919
GENE455X	Otx2	consensus_chr14_48653661_48653928	15.9894	16.0116	16.0555	16.0985	16.4496
GENE456X	Otx2	consensus_chr14_48654960_48655406	15.9521	16.0023	15.9636	16.073	16.4292
GENE298X	L1td1	consensus_chr4_98727954_98728510	15.8016	16.1986	15.942	16.1449	16.4743
GENE297X	L1td1	consensus_chr4_98726663_98726945	15.8101	16.1733	15.9388	16.1301	16.4817
GENE441X	Fst	consensus_chr13_114406841_114407585	15.8259	15.7857	16.4358	16.2741	16.257
GENE440X	Fst	consensus_chr13_114406548_114406714	15.8022	15.7825	16.4222	16.2659	16.2306
GENE340X	Trh	consensus_chr6_97101730_97101881	15.3521	16.1891	16.1826	16.3507	16.3368
GENE341X	Trh	consensus_chr6_97102282_97102637	15.3293	16.1725	16.1699	16.3168	16.333
GENE357X	Nanog	consensus_chr6_122707200_122707662	15.4861	16.2607	16.1287	16.1199	16.1333
GENE121X	Fzd10	consensus_chr5_128596830_128597360	15.6328	16.4856	16.2921	16.1628	15.9913
GENE6X	Sox13	consensus_chr1_133493152_133493749	16.1258	16.7975	16.1707	15.9854	16.3046
GENE5X	Sox13	consensus_chr1_133492580_133492862	16.1245	16.7963	16.155	16.0062	16.2975
GENE344X	Gt(ROSA)26Sor	consensus_chr6_113077039_113077254	16.3824	16.4419	16.0838	16.0133	16.2814
GENE218X	Wnt3	consensus_chr11_103808652_103808831	15.7447	16.5474	15.8767	15.9642	15.3847
GENE220X	Wnt3	consensus_chr11_103810386_103810439	15.7625	16.6051	15.7657	15.9418	15.3676
GENE219X	Wnt3	consensus_chr11_103809172_103809552	15.8177	16.6778	15.92	16.0423	15.4372
GENE68X	Id1	consensus_chr2_152736335_152736401	16.7704	16.8048	15.7977	15.7121	15.2269
GENE67X	Id1	consensus_chr2_152735131_152735359	16.7161	16.7374	15.6748	15.5513	15.0609
GENE112X	Tbx3	consensus_chr5_119706806_119706869	16.1904	16.4157	15.4888	15.2527	14.5648
GENE111X	Tbx3	consensus_chr5_119706579_119706794	16.175	16.3931	15.4598	15.2337	14.5588
GENE248X	Gm16386	consensus_chr17_22745725_22746266	13.0712	13.7342	14.0791	14.2218	13.6998
GENE426X	Smad7	consensus_chr18_75353497_75353669	13.1163	13.7169	13.9721	14.0649	13.7381
GENE0X	Spats2l	consensus_chr1_57862138_57862396	12.9834	13.6958	13.9486	14.0673	13.5915
GENE110X	Tbx3	consensus_chr5_119613558_119613838	13.2994	13.8038	13.9538	14.1572	13.6731
GENE135X	Kbtbd3	consensus_chr9_4226971_4227211	13.3791	13.8179	13.9919	14.0935	13.5869
GENE468X	AK030646	consensus_chr8_4582747_4582992	13.2154	13.7894	14.3245	13.9594	13.5612
GENE397X	Chst15	consensus_chr7_132320651_132320895	13.1926	13.949	14.1849	13.9481	13.435
GENE16X	Atf3	consensus_chr1_191190073_191190359	13.3837	14.0379	13.9532	13.97	13.5661
GENE205X	Hoxb1	consensus_chr11_96341761_96342424	13.2544	14.1376	13.9062	13.7773	13.5991
GENE423X	Pcdh1	consensus_chr18_38278836_38278976	13.4633	13.7846	13.6852	13.8418	13.8835
GENE27X	Dact1	consensus_chr12_71376627_71376890	13.3068	13.5045	14.0575	13.9355	13.5908
GENE153X	Eomes	consensus_chr9_118384752_118384964	13.3491	13.3847	13.8736	14.0038	13.4478
GENE308X	Id3	consensus_chr4_138396228_138396353	13.3703	13.4625	13.7891	13.7755	13.7159
GENE475X	Efnb1	consensus_chrX_139345212_139345622	13.0577	13.4496	13.7898	13.919	13.7851
GENE166X	Cd24a	consensus_chr10_44553532_44553939	13.2987	13.6247	13.8062	13.6049	13.5143
GENE105X	Fgf5	consensus_chr5_98293510_98293685	13.2897	13.6367	13.6916	13.664	13.4747
GENE54X	Sp5	consensus_chr2_70563254_70563440	13.1385	13.5478	13.7726	13.5849	13.3453
GENE320X	Kazn	consensus_chr4_142197117_142197286	13.1311	13.4552	13.615	13.7005	13.5771
GENE332X	Mest	consensus_chr6_30711408_30711749	13.5477	13.5724	13.9305	14.2254	13.968
GENE99X	Grsf1	consensus_chr5_88670674_88670933	13.4647	13.6164	13.8196	14.0634	13.8974
GENE272X	Kcng3	consensus_chr17_83694920_83695176	13.3538	13.5171	14.0417	14.226	13.7961
GENE278X	Crabp2	consensus_chr3_86566305_86566532	13.5986	13.3177	13.7167	14.4183	13.6717
GENE394X	Fgfr2	consensus_chr7_130327950_130328203	13.64	13.8784	14.2167	14.1115	13.7669
GENE84X	Dok5	consensus_chr2_170726216_170726396	13.7203	13.8375	14.1442	14.0466	13.7575
GENE413X	Hes1	consensus_chr16_33605791_33606065	13.7088	13.9674	14.1602	14.1259	13.6504
GENE253X	Cdkn1a	consensus_chr17_29093566_29093896	13.5542	13.9699	14.0456	14.1136	13.662
GENE206X	Hoxb1	consensus_chr11_96368741_96368886	13.5372	13.8593	14.2252	14.105	13.6096
GENE385X	Rgma	consensus_chr7_82056669_82056859	13.6547	13.7631	14.1486	14.1816	13.8546
GENE199X	Irf1	consensus_chr11_53826945_53827092	13.6488	13.8155	14.1219	14.1404	13.8724
GENE189X	Irgm1	consensus_chr11_48826804_48827096	13.6905	13.6863	14.0478	14.1235	13.8295
GENE398X	Chst15	consensus_chr7_132360099_132360285	13.6245	13.7739	14.0451	13.8928	13.6169
GENE15X	Atf3	consensus_chr1_191120954_191121020	13.6213	13.7084	14.002	14.0169	13.5221
GENE384X	Ap3b2	consensus_chr7_81497209_81497360	13.4789	13.724	14.0296	13.9677	13.6891
GENE139X	Tle3	consensus_chr9_61293122_61293899	13.5747	14.1167	14.4057	14.1335	13.9413
GENE141X	Tle3	consensus_chr9_61339317_61339544	13.316	13.9632	14.2796	14.1067	13.9043
GENE142X	Tle3	consensus_chr9_61361289_61361481	13.7784	14.0537	14.3691	14.0537	13.4938
GENE429X	Klf6	consensus_chr13_5892395_5892635	13.5654	13.7865	14.618	13.9598	13.4637
GENE50X	Spc25	consensus_chr2_69150788_69151293	13.4446	13.7799	14.4885	14.3638	13.8812
GENE226X	Klf10	consensus_chr15_40955266_40955765	13.3381	13.9029	14.585	14.2973	13.6052
GENE155X	Eomes	consensus_chr9_118432551_118433292	13.3205	13.6031	14.5977	14.4587	13.5925
GENE325X	Ski	consensus_chr4_155290432_155291069	13.0754	13.7672	14.3473	14.1948	13.799
GENE463X	Otx2	consensus_chr14_49089813_49089999	13.4754	13.583	14.408	14.1662	13.3585
GENE100X	Grsf1	consensus_chr5_88679333_88679917	13.3328	13.2921	14.2472	14.2476	13.4174
GENE101X	Grsf1	consensus_chr5_88684336_88684662	13.1825	13.3285	14.3575	14.4947	13.7392
GENE156X	Eomes	consensus_chr9_118455982_118456509	13.1079	13.1335	14.4451	14.5413	13.8193
GENE285X	Bcar3	consensus_chr3_122414149_122414544	13.2227	13.2294	14.1586	14.1462	13.7184
GENE239X	T	consensus_chr17_8389190_8389339	13.0159	12.9695	14.1303	14.1424	13.7341
GENE157X	Eomes	consensus_chr9_118468200_118468630	12.6709	13.2202	14.4104	14.5535	14.0501
GENE293X	Cyr61	consensus_chr3_145690958_145691084	13.431	13.3959	13.6169	13.7082	13.2917
GENE331X	Peg10	consensus_chr6_4855296_4855436	13.4542	13.3762	13.5351	13.7418	13.1952
GENE57X	Cd59a	consensus_chr2_104188245_104188452	13.3341	13.1762	13.4327	13.7899	13.1752
GENE474X	Efnb1	consensus_chrX_139317424_139317594	13.1328	13.1729	13.5615	13.7032	13.5189
GENE102X	Fgf5	consensus_chr5_98167646_98167808	13.177	13.0566	13.5854	13.6383	13.5316
GENE42X	Scd1	consensus_chr19_44474304_44474435	13.5666	13.4108	13.7912	13.8008	13.5103
GENE386X	Rgma	consensus_chr7_82063489_82063814	13.5504	13.2741	13.7272	13.9079	13.4166
GENE473X	Efnb1	consensus_chrX_106080918_106081259	13.002	13.136	13.7428	13.9017	13.9829
GENE204X	Hlf	consensus_chr11_90391688_90391958	12.8227	13.0424	13.591	13.9703	13.9382
GENE228X	Has2	consensus_chr15_54702219_54702825	12.7933	13.4047	13.8178	14.2477	13.7143
GENE477X	Efnb1	consensus_chrX_145524466_145524856	12.5921	13.096	14.0945	13.9238	13.353
GENE464X	Otx2	consensus_chr14_49155640_49155812	12.8171	12.8369	13.9501	13.8597	13.2607
GENE469X	Dusp4	consensus_chr8_34732699_34733049	13.257	13.1145	13.8418	13.3709	12.7324
GENE471X	Efnb1	consensus_chrX_99045496_99045800	12.5332	13.2146	13.4152	13.1965	12.8962
GENE375X	D7Ertd143e	consensus_chr7_3314282_3314409	13.9257	13.895	14.0668	14.0091	13.7316
GENE392X	Fgfr2	consensus_chr7_130252207_130252429	14.0274	13.8312	13.9321	13.8264	13.6555
GENE381X	Rgma	consensus_chr7_73344144_73344284	13.987	13.6904	14.0496	13.9298	13.4565
GENE366X	Kras	consensus_chr6_144373492_144373661	13.8384	13.7171	13.8119	14.0874	13.6113
GENE94X	Msx1	consensus_chr5_37832855_37832998	13.8375	14.1114	13.9785	13.8111	13.26
GENE49X	Ier5l	consensus_chr2_30474056_30474199	13.7294	14.02	13.6767	13.8176	13.5997
GENE436X	Msx2	consensus_chr13_53455410_53455576	13.6205	13.9258	13.7692	13.6465	13.4915
GENE437X	Neurog1	consensus_chr13_56222214_56222396	13.8365	14.0103	13.4762	13.6733	13.6227
GENE93X	Msx1	consensus_chr5_37826777_37827028	14.1347	14.7235	14.0604	13.8259	13.4314
GENE254X	Pim1	consensus_chr17_29451085_29451569	13.933	14.6347	14.0385	13.8709	13.5541
GENE134X	Cdx2	consensus_chr5_147304967_147305067	14.077	14.4277	14.108	13.9531	13.5263
GENE165X	Cd24a	consensus_chr10_44392015_44392352	13.448	14.4736	13.9054	14.2027	13.6413
GENE432X	Tfap2a	consensus_chr13_40744792_40744854	14.2406	14.2925	13.3815	13.5396	13.067
GENE435X	Gadd45g	consensus_chr13_51853524_51853585	13.6488	14.3359	13.2994	13.2476	13.3391
GENE476X	Efnb1	consensus_chrX_139436747_139436935	12.2849	12.5081	12.7237	12.6498	12.469
GENE472X	Efnb1	consensus_chrX_99152773_99152929	12.5676	13.1235	12.6657	12.6559	11.5229
GENE30X	Ubr7	consensus_chr12_102758889_102759365	15.8641	16.632	16.4728	16.3928	16.7297
GENE29X	Ubr7	consensus_chr12_102758660_102758816	15.8698	16.6171	16.4691	16.3947	16.72
GENE122X	Fzd10	consensus_chr5_128598418_128598625	16.0985	16.8368	16.5734	16.3996	16.4686
GENE355X	Nanog	consensus_chr6_122702403_122702936	16.143	16.8042	16.7805	16.7504	16.7239
GENE124X	Fzd10	consensus_chr5_128601637_128601965	16.1578	16.8614	16.5975	16.5921	16.7437
GENE378X	Snurf	consensus_chr7_60006072_60006972	16.723	16.3258	16.4989	16.576	16.8076
GENE379X	Snurf	consensus_chr7_60007871_60008424	16.5478	16.1777	16.3709	16.4528	16.7021
GENE352X	Nanog	consensus_chr6_122608433_122608717	16.9131	16.8514	16.6181	16.3921	16.7537
GENE353X	Nanog	consensus_chr6_122609943_122610121	16.7884	16.7267	16.5606	16.3002	16.6548
GENE461X	Otx2	consensus_chr14_48753109_48753424	16.9721	16.9821	16.4305	16.2045	16.5938
GENE462X	Otx2	consensus_chr14_48754197_48754367	16.9075	16.9314	16.3877	16.1579	16.5562
GENE360X	Slc2a3	consensus_chr6_122765209_122765420	16.9557	17.0302	16.7416	16.5114	16.6571
GENE361X	Slc2a3	consensus_chr6_122766285_122766338	16.9121	16.9848	16.7183	16.4842	16.6244
GENE356X	Nanog	consensus_chr6_122703628_122704129	16.2535	17.0408	17.0015	16.9222	16.874
GENE123X	Fzd10	consensus_chr5_128600543_128600829	16.326	17.0789	16.8257	16.7311	16.8557
GENE371X	Kras	consensus_chr6_145275740_145276846	16.3686	16.6946	16.7584	16.9383	17.0932
GENE370X	Kras	consensus_chr6_145275052_145275342	16.3279	16.639	16.7195	16.8902	17.0401
GENE257X	Pou5f1	consensus_chr17_35504528_35506015	16.6676	17.104	16.8991	16.8669	17.3279
GENE256X	Pou5f1	consensus_chr17_35503853_35504299	16.5249	16.9857	16.7784	16.7372	17.2247
GENE244X	Spaca6	consensus_chr17_17826709_17826997	15.2775	16.7521	16.4252	16.6841	17.1025
GENE246X	Spaca6	consensus_chr17_17827567_17828588	15.2701	16.7201	16.4177	16.6232	17.107
GENE245X	Spaca6	consensus_chr17_17827285_17827425	15.3349	16.7955	16.4763	16.7337	17.1598
GENE151X	Tdgf1	consensus_chr9_110947137_110948383	15.076	16.5677	16.9057	16.8792	17.1711
GENE150X	Tdgf1	consensus_chr9_110946531_110946721	14.9443	16.4454	16.7704	16.7361	17.0526
GENE175X	Nodal	consensus_chr10_61418275_61418474	14.929	16.4574	16.5938	16.4987	16.8901
GENE152X	Tdgf1	consensus_chr9_110949302_110949525	14.882	16.3162	16.5992	16.5035	16.8426
GENE243X	Spaca6	consensus_chr17_17825762_17826184	14.997	16.5748	16.249	16.4802	16.9106
GENE288X	Pitx2	consensus_chr3_129216817_129217096	14.7525	16.6289	17.0607	17.0417	16.8929
GENE289X	Pitx2	consensus_chr3_129217178_129217766	14.7189	16.5881	17.0096	17.0299	16.8391
GENE290X	Pitx2	consensus_chr3_129217914_129218115	14.6055	16.4806	16.9475	16.9547	16.728
GENE10X	Lefty2	consensus_chr1_180890289_180890577	15.3917	16.6988	17.2954	17.3054	17.3342
GENE8X	Lefty2	consensus_chr1_180887934_180889501	15.3449	16.6691	17.304	17.3018	17.3733
GENE9X	Lefty2	consensus_chr1_180889952_180890153	15.4217	16.7451	17.3803	17.3727	17.4126
GENE335X	Trh	consensus_chr6_92247122_92248225	16.4072	16.9229	17.4554	17.4061	17.6253
GENE334X	Trh	consensus_chr6_92246269_92246732	16.3973	16.9048	17.4505	17.4024	17.6197
GENE80X	Sall4	consensus_chr2_168838785_168839141	17.3416	17.311	16.9523	16.8883	17.0089
GENE117X	Setd1b	consensus_chr5_123140997_123141187	17.353	17.4167	16.8268	16.7864	17.0794
GENE349X	Phc1	consensus_chr6_122340368_122340910	17.2768	17.1435	16.8357	16.9345	17.2719
GENE350X	Phc1	consensus_chr6_122342170_122342533	17.206	17.0587	16.8177	16.9022	17.2173
GENE81X	Sall4	consensus_chr2_168840268_168840521	17.6195	17.5911	17.2109	17.0471	17.2586
GENE82X	Sall4	consensus_chr2_168840980_168841183	17.5407	17.5033	17.1423	16.9399	17.1848
GENE114X	Setd1b	consensus_chr5_123136547_123137136	17.571	17.8049	17.2962	17.1383	17.5683
GENE116X	Setd1b	consensus_chr5_123138268_123138554	18.0975	18.2523	17.6783	17.5792	17.9603
GENE115X	Setd1b	consensus_chr5_123137711_123137959	18.0786	18.2345	17.6936	17.5674	17.9659
