# Supplementary material for: Distinct modes of SMAD2 chromatin binding and remodeling shape the transcriptional response to NODAL/Activin signaling
Source: eLife. 2017 Feb 13;6:e22474. doi: 10.7554/eLife.22474 (PMC5305219; doi:10.7554/eLife.22474)
Supplement: Figure 7—source data 1. — DOI: http://dx.doi.org/10.7554/eLife.22474.022 [file elife-22474-fig7-data1.xlsx]

## Sheet: Sheet1
Bin Center	Pou5f1	Foxh1
0	0	0
10	0.0121951	0
20	0	0.00555556
30	0	0
40	0.0121951	0
50	0	0
60	0.0121951	0
70	0.0121951	0.00555556
80	0.0121951	0.0111111
90	0.0243902	0.00555556
100	0.0121951	0.00555556
110	0.0487805	0
120	0.0365854	0
130	0	0
140	0.0121951	0.00555556
150	0.0365854	0
160	0.0609756	0.00555556
170	0	0.0166667
180	0.0243902	0.0166667
190	0.0243902	0.0166667
200	0	0.0277778
210	0.0487805	0.0444445
220	0.0365854	0.0666667
230	0.0365854	0.0666667
240	0.0243902	0.127778
250	0.0487805	0.183333
260	0.0243902	0.0777778
270	0.0121951	0.0611111
280	0.0243902	0.0611111
290	0.0243902	0.0388889
300	0	0.0444445
310	0.0121951	0.0166667
320	0.0365854	0.0166667
330	0.0121951	0
340	0	0.00555556
350	0.0121951	0
360	0.0487805	0.00555556
370	0.0121951	0.0111111
380	0.0243902	0
390	0.0365854	0.00555556
400	0.0121951	0.00555556
410	0.0243902	0
420	0	0.0111111
430	0.0243902	0
440	0.0243902	0
450	0.0121951	0.0111111
460	0.0243902	0
470	0.0121951	0
480	0	0.0166667
490	0.0487805	0
500	0	0
