# Supplementary material for: Distinct modes of SMAD2 chromatin binding and remodeling shape the transcriptional response to NODAL/Activin signaling
Source: eLife journal article supplement (doi:10.7554/elife.22474), 2017-02-11
Supplement: figures [file elife-22474-figures-v1.pdf]

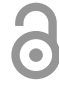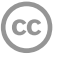

---

## Figures and figure supplements

Distinct modes of SMAD2 chromatin binding and remodeling shape the transcriptional response to NODAL/Activin signaling

**Davide M Coda et al**

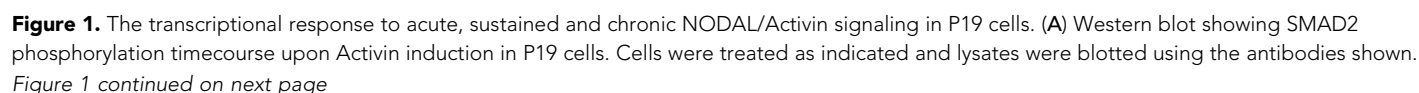

## Figure 1 continued

Arrows indicate the conditions used for the RNA-seq. Below, the phosphorylated SMAD2 (pSMAD2) signal was quantified relative to total SMAD2/3. Untr, untreated (chronic signaling). (B) RNA-seq was performed on P19 cells either untreated or incubated overnight with SB-431542, washed out, then replaced with full media containing SB-431542 for 1 hr (SB-431542 sample), or with full media containing Activin for 1 hr or 8 hr. Shown is a hierarchically-clustered heatmap of  $\log_2$ FC values (relative to SB-431542) for each time point for 747 differentially-expressed genes. (C)  $\log_2$ FC values relative to SB-431542 at each time point plotted for the target genes falling within each of four distinct kinetic clusters. Untr, untreated. (D) Following RNA-seq of control, cycloheximide- or emetine-treated samples in the SB-431542, 1 hr Activin and 8 hr Activin conditions, genes were defined as 'direct' or 'indirect' depending on whether their pattern changed upon protein synthesis inhibition. Displayed are the relative proportions of direct and indirect target genes in each kinetic cluster. (E) Cells were treated with or without cycloheximide as in (D) and processed for qPCR. Transcript levels for a subset of target genes were quantified relative to *Gapdh*. Plotted are the means and SEM of two independent experiments performed in duplicate. n.s., not significant. \*\*\*\* corresponds to a p value of  $< 0.0001$ ; \*\*\* corresponds to a p value of  $< 0.001$  and \*\* corresponds to a p value of  $< 0.01$ . (F) Cells were treated overnight with SB-431542, washed out, then stimulated for the indicated times with Activin (blue line) or SB-431542 was added to the Activin-containing media after 1 hr of Activin treatment (red line). qPCR was performed for the genes shown, which are representatives of each of the four distinct transcriptional profiles. Plotted are the means and SEM of three independent experiments performed in duplicate. \*\*\* corresponds to a p value of  $< 0.001$  and \*\* corresponds to a p value of  $< 0.01$ .

DOI: [10.7554/eLife.22474.003](https://doi.org/10.7554/eLife.22474.003)

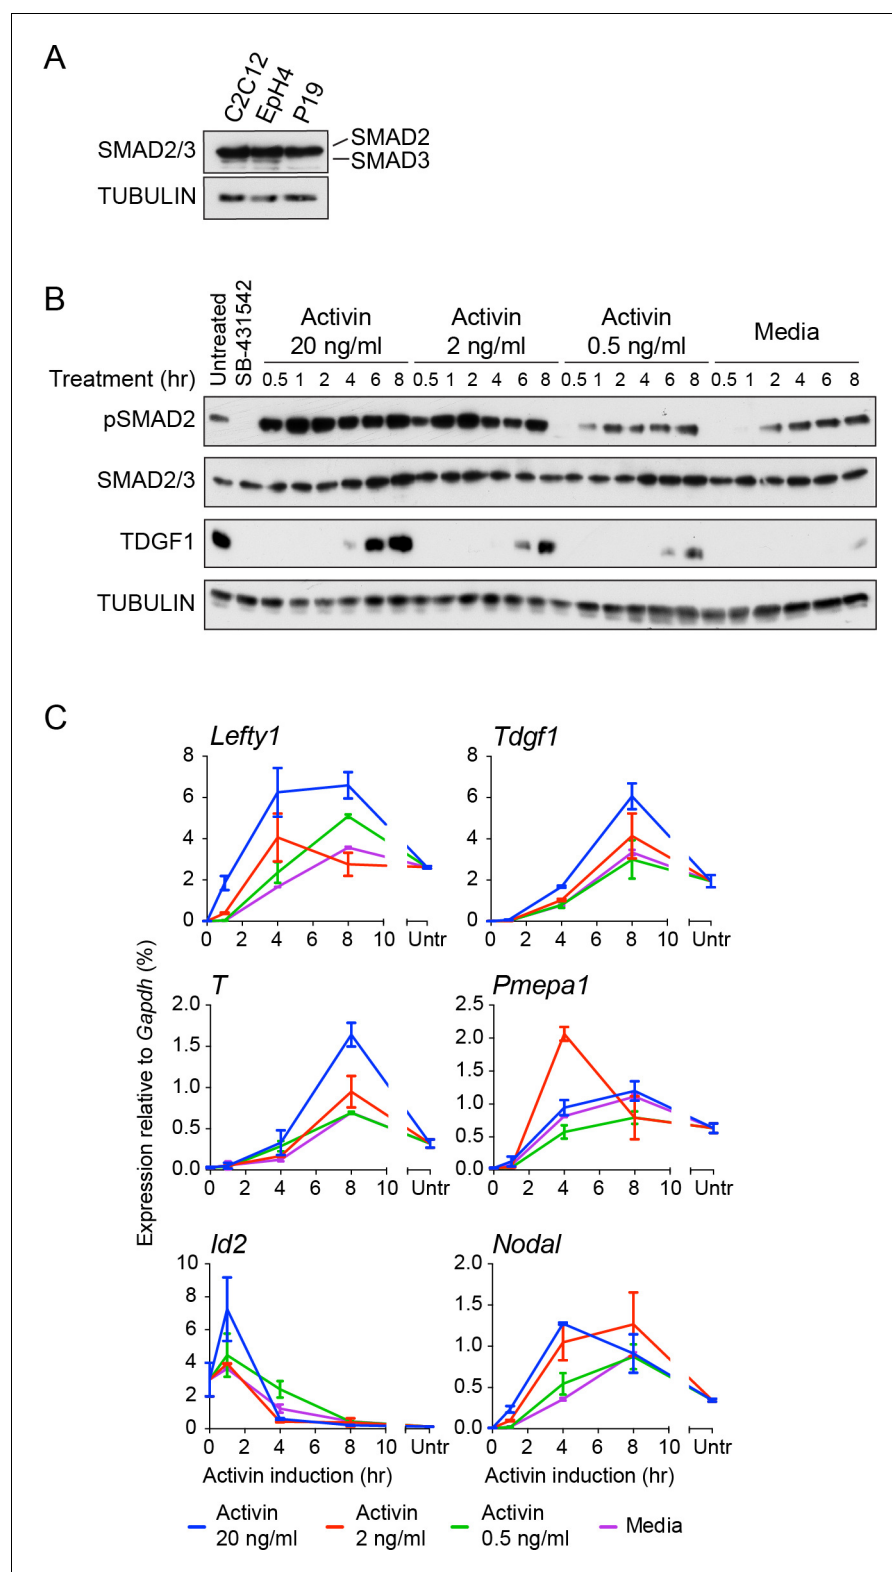

**Figure 1—figure supplement 1.** Characterization of Activin/NODAL-induced transcription in P19 cells. (A) Western blot for SMAD2/3 and TUBULIN (loading control) on lysates collected from P19 cells and two other mouse cell lines, C2C12 and Eph4 for comparison. Note that P19 cells express similar levels of SMAD2 compared to the others cell lines, but undetectable levels of SMAD3. (B) Western blot for pSMAD2, SMAD2/3, TDGF1 and TUBULIN (loading control) on lysates collected from cells treated overnight with SB-431542, followed by washout

Figure 1—figure supplement 1 continued on next page



*Figure 1—figure supplement 1 continued*

and stimulation for the indicated times with the concentrations of Activin shown, or with media alone. (C) qPCR on samples treated as in (B), for induced and repressed genes, showing dose-dependent induction of several targets. A representative experiment (means  $\pm$  SD) is shown. Untr, untreated.

DOI: [10.7554/eLife.22474.004](https://doi.org/10.7554/eLife.22474.004)

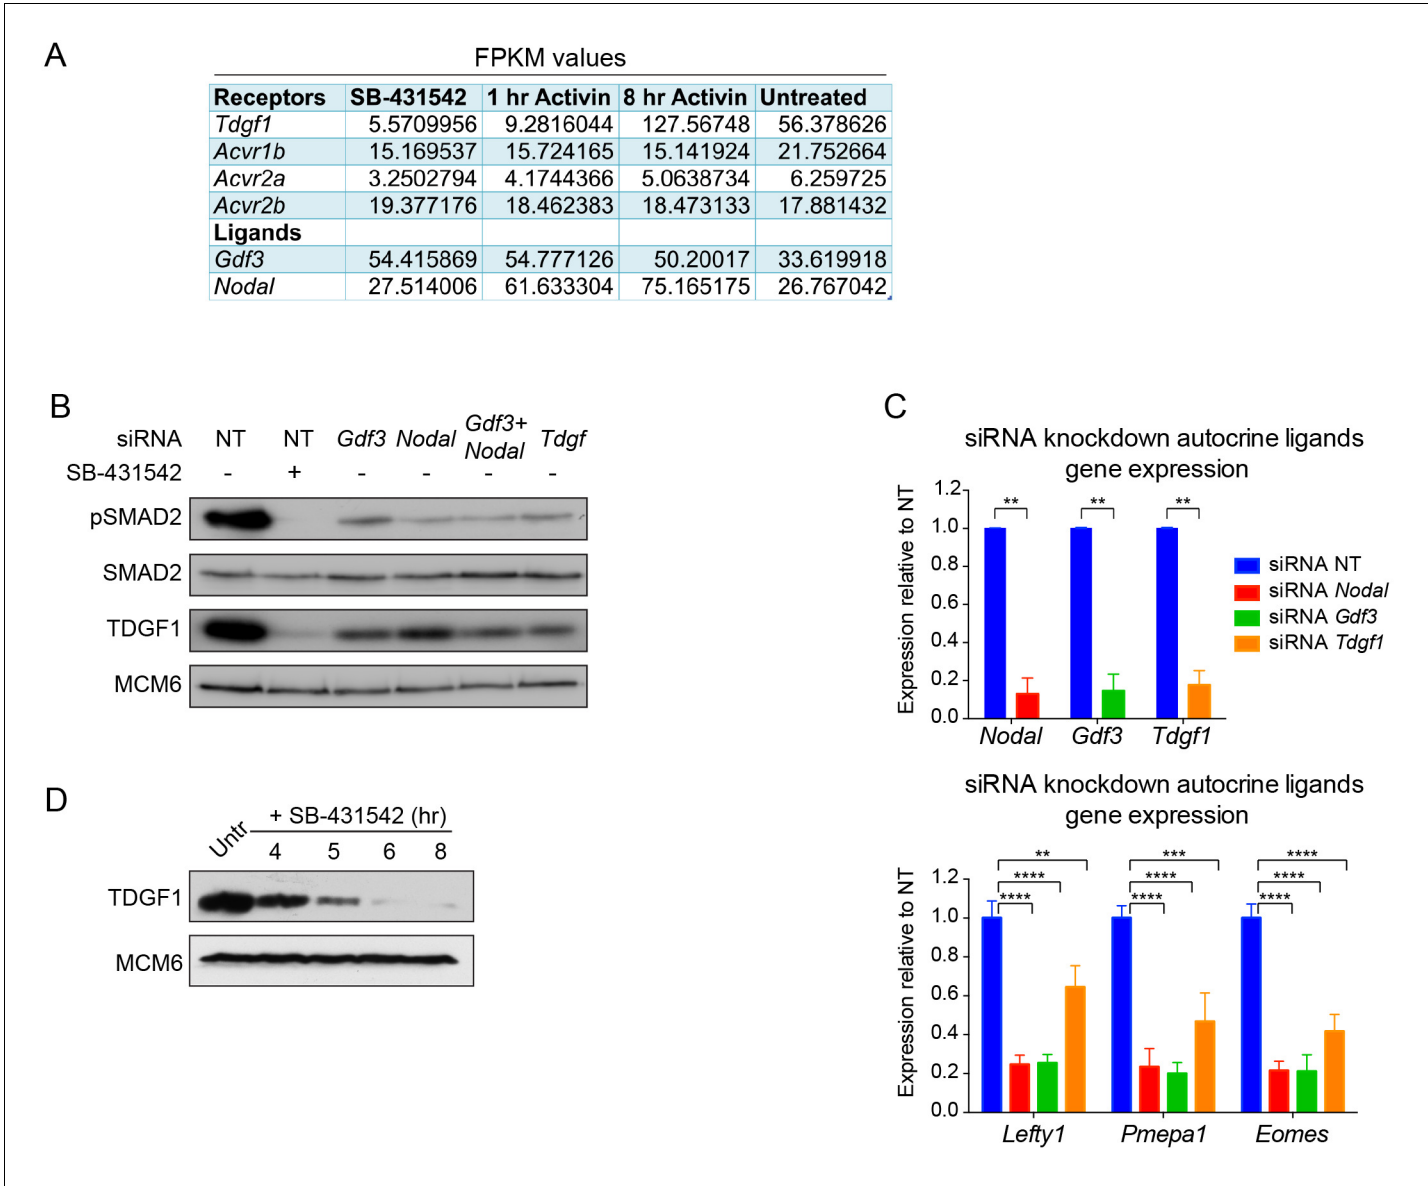

**Figure 1—figure supplement 2.** Characterization of the autocrine signal. (A) Fragments per kilobase of exon per million fragments mapped (FPKM) values as obtained by RNA-seq (average of duplicates) for ligands and receptors involved in Activin/NODAL signaling. Shown are the values for each of the treatment states as indicated. (B) siRNA-mediated knockdown of the indicated ligands using pooled siRNA oligonucleotides. Lysates were collected 72 hr after transfection and Western blotted for pSMAD2, total SMAD2, TDGF1 and MCM6 (loading). NT, non-targeting. (C) qPCR performed on mRNA extracted from the same samples as in (B), showing knockdown efficiency of *Nodal*, *Gdf3* and *Tdgf1* (top panel) and indicated known target genes *Lefty1*, *Pmepa1* and *Eomes* (bottom panel). Values were normalized to endogenous *Gapdh* and shown are expression levels relative to the non-targeting (NT) siRNA control. Plotted are the means and SEM of two independent experiments performed in duplicate. \*\*\*\* corresponds to a p value of < 0.0001; \*\*\* corresponds to a p value of < 0.001; \*\* corresponds to a p value of < 0.01. (D) Western blot for TDGF1 and MCM6 (loading control) on lysates collected from untreated (Untr) P19 cells or cells treated for the indicated times with 10  $\mu$ M SB-431542, showing that TDGF1 has a short half-life and is under control of SMAD2-mediated signaling.

DOI: 10.7554/eLife.22474.005

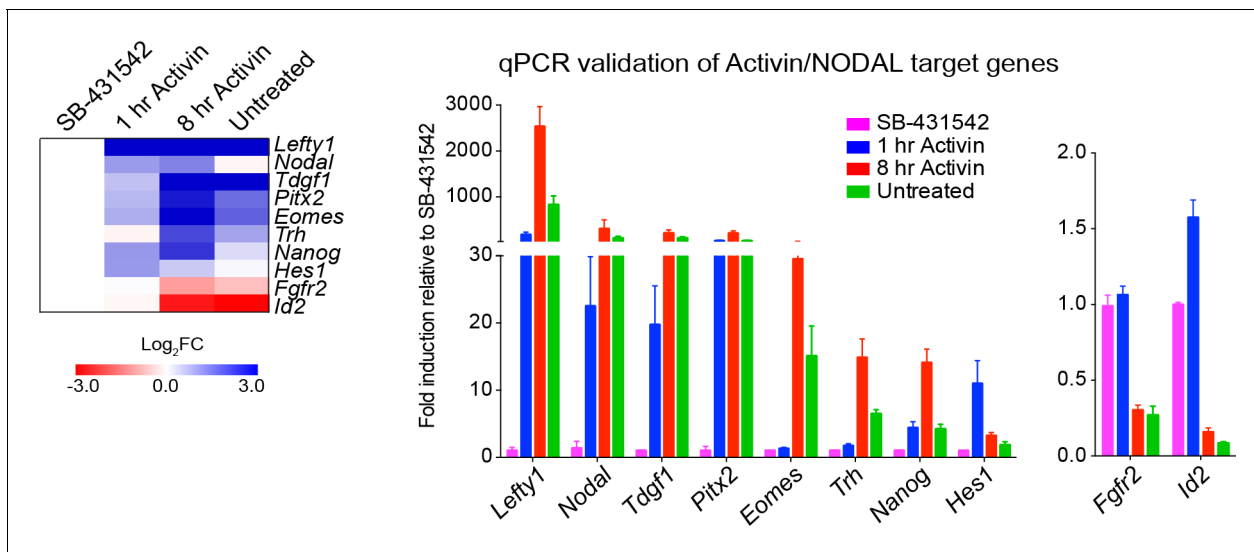

**Figure 1—figure supplement 3.** Activin/NODAL target genes are induced with different kinetics. Left panel, a heatmap showing the  $\log_2FC$  values for the Activin-treated and untreated samples relative to the SB-431542-treated samples as determined by RNA-seq. Right panel, qPCR validation for selected target genes. Plotted are the means and SEM of three independent experiments of gene expression values normalized to endogenous *Gapdh* values.

DOI: [10.7554/eLife.22474.006](https://doi.org/10.7554/eLife.22474.006)

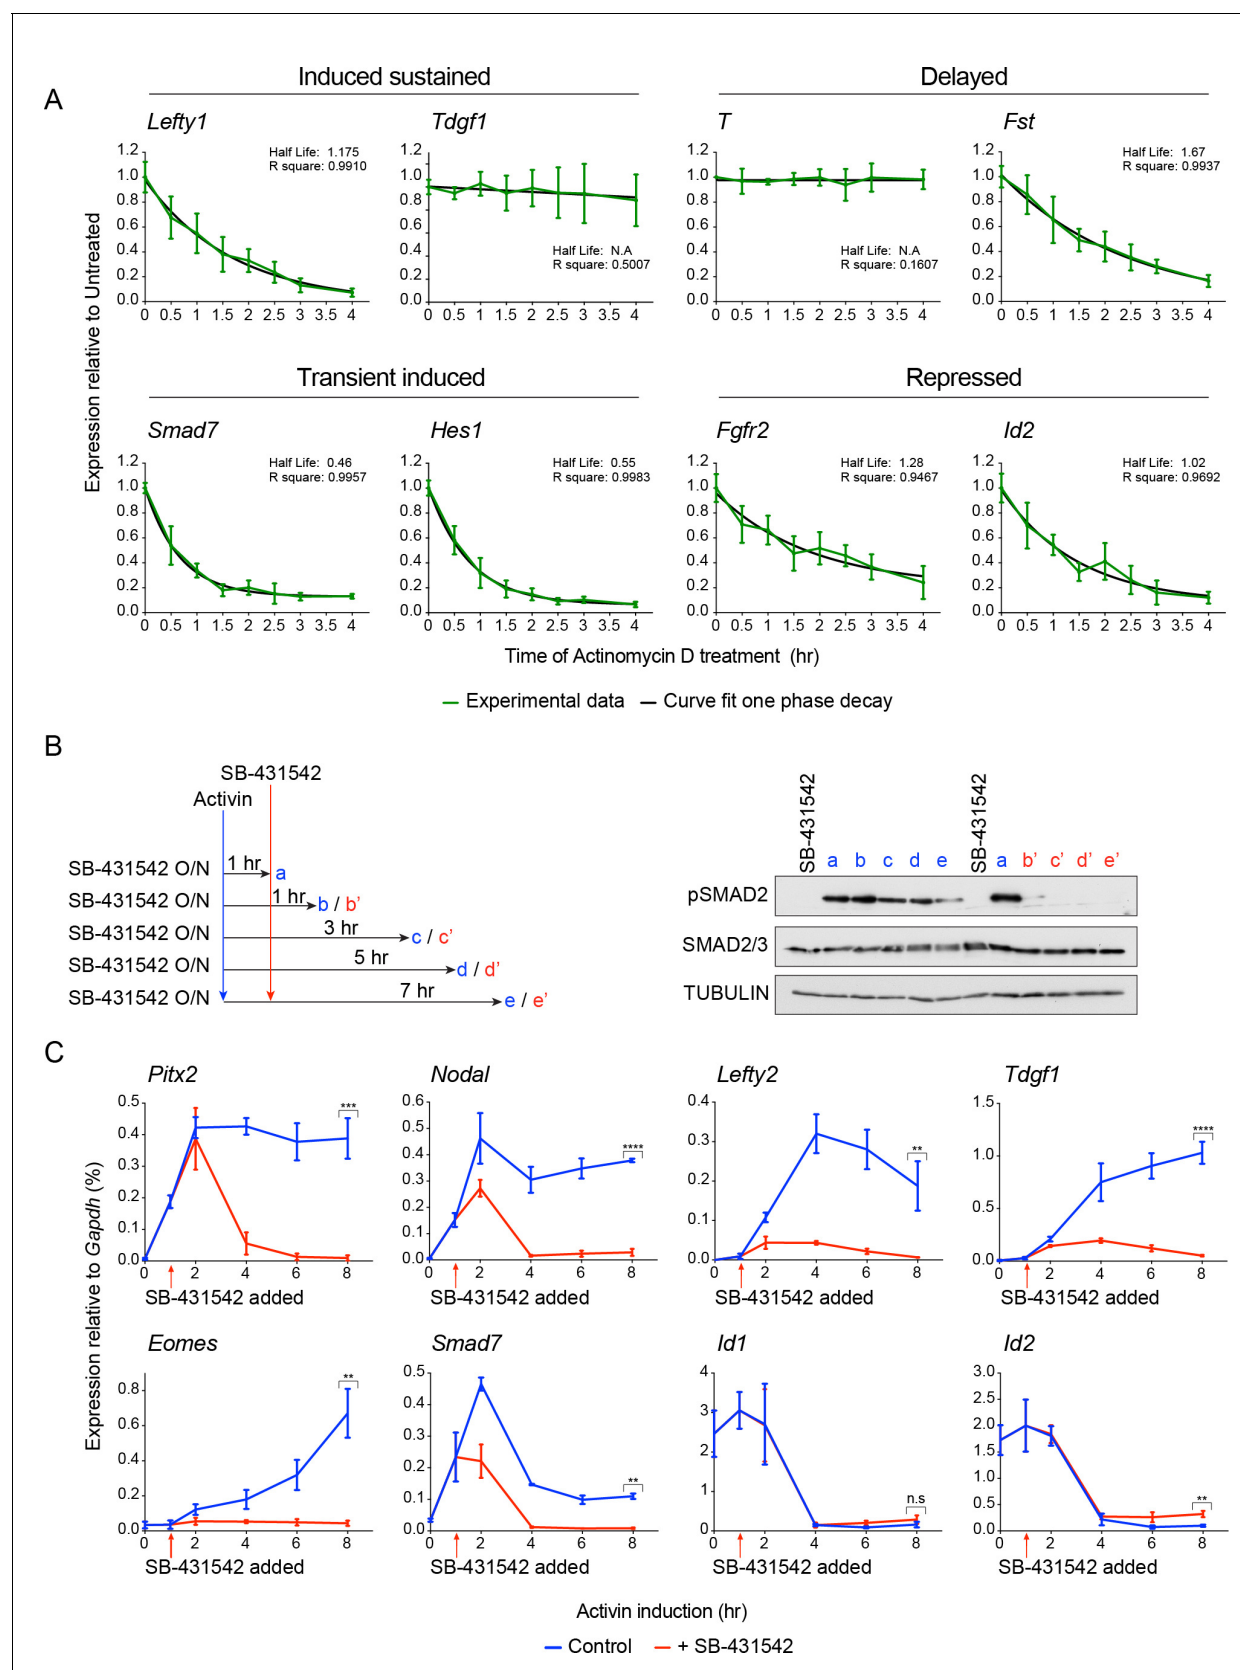

**Figure 1—figure supplement 4.** Activin/NODAL target gene expression patterns require continuous Activin/NODAL signaling over a sustained time course. (A) mRNA stability of Activin/Nodal target genes. Cells were treated with Actinomycin D (6  $\mu$ M) for the indicated times to inhibit further mRNA Figure 1—figure supplement 4 continued on next page

*Figure 1—figure supplement 4 continued*

synthesis. Levels of mRNA for a subset of target genes was measured by qPCR, and the half-life of the mRNA was calculated. Plotted are the means and SEM of three independent experiments performed in duplicate. **(B and C)** Effects of SB-431542 chase on Activin/NODAL-induced transcription. Cells were treated overnight with SB-431542, washed out, then stimulated for the indicated times with Activin, or SB-431542 was added to the Activin-containing media after 1 hr of Activin treatment. Whole cell extracts were prepared and Western blotted for pSMAD2, SMAD2/3, and TUBULIN (loading control) **(B)**. Samples were also prepared for qPCR to determine mRNA levels of induced and repressed target genes **(C)**. In **(C)**, the means and SEM of three independent experiments performed in duplicate are plotted. \*\*\*\* corresponds to a p value of  $< 0.0001$ ; \*\*\* corresponds to a p value of  $< 0.001$ ; \*\* corresponds to a p value of  $< 0.01$ ; n.s., not significant.

DOI: [10.7554/eLife.22474.007](https://doi.org/10.7554/eLife.22474.007)

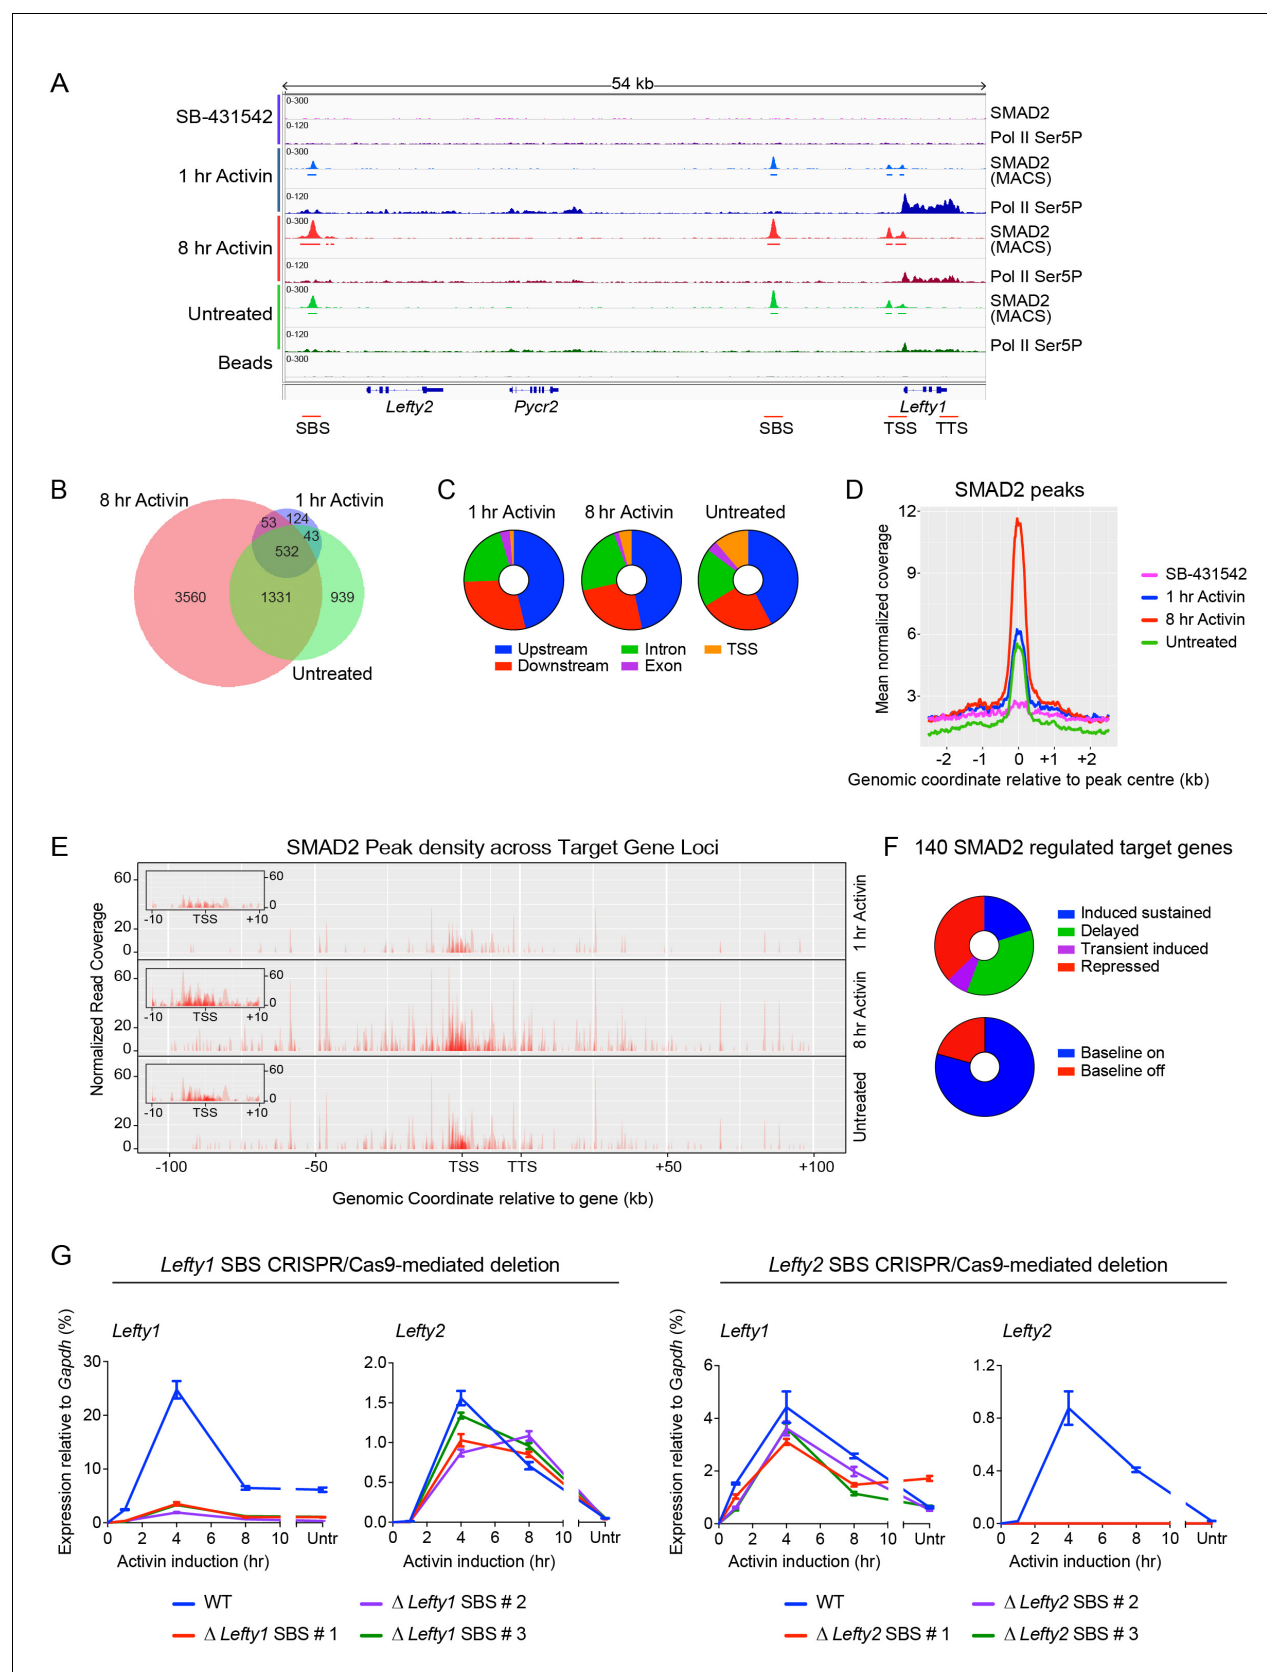

**Figure 2.** Combining RNA-seq with ChIP-seq for SMAD2 and Pol II leads to the definition of a high confidence dataset. (A) IGV browser display of the *Lefty1/Lefty2* genomic locus, showing tracks and MACS-called peaks for SMAD2 and tracks for Pol II Ser5P. Red lines below are regions for which ChIP-seq signal was detected. Figure 2 continued on next page

## Figure 2 continued

qPCR primers were designed. (B) SMAD2 ChIP-sequencing was performed on P19 cells in the same conditions as the RNA-seq (**Figure 1**). The numbers of peaks in each condition are shown in the Venn diagram. (C) Distribution of SMAD2 peaks based on their genomic annotation to upstream or downstream intergenic regions, TSS (considered TSS  $\pm$  500 bp), exonic or intronic location. (D) Metaprofiles for the SMAD2 peaks in the high confidence dataset. Normalized read counts centred on the peak  $\pm$  2 kb are shown for the four different experimental conditions. (E) Plots displaying the density of SMAD2 peaks in the high confidence dataset and their distance from the annotated TSS of the nearest regulated target gene within a  $\pm$  100 kb window for each condition. All genes are modeled as 20 kb from TSS to TTS. Insets show density of SMAD2 peaks  $\pm$  10 kb centred around the TSS of the modeled target genes. (F) Distribution of the high confidence dataset of 140 SMAD2-regulated genes within each of the four categories, or segregated according to 'baseline on' or 'baseline off' in the SB-431542 state. (G) Left panel: Deletion of the upstream *Lefty1* SBS in three independent clones inhibits Activin-induced *Lefty1* transcription, but not *Lefty2* transcription. Right panel. Deletion of the upstream *Lefty2* SBS in three independent clones inhibits Activin-induced *Lefty2* transcription, but not *Lefty1* transcription. Transcript levels were quantified relative to *Gapdh*. A representative experiment (means  $\pm$  SD) is shown. Untr, untreated.

DOI: [10.7554/eLife.22474.008](https://doi.org/10.7554/eLife.22474.008)

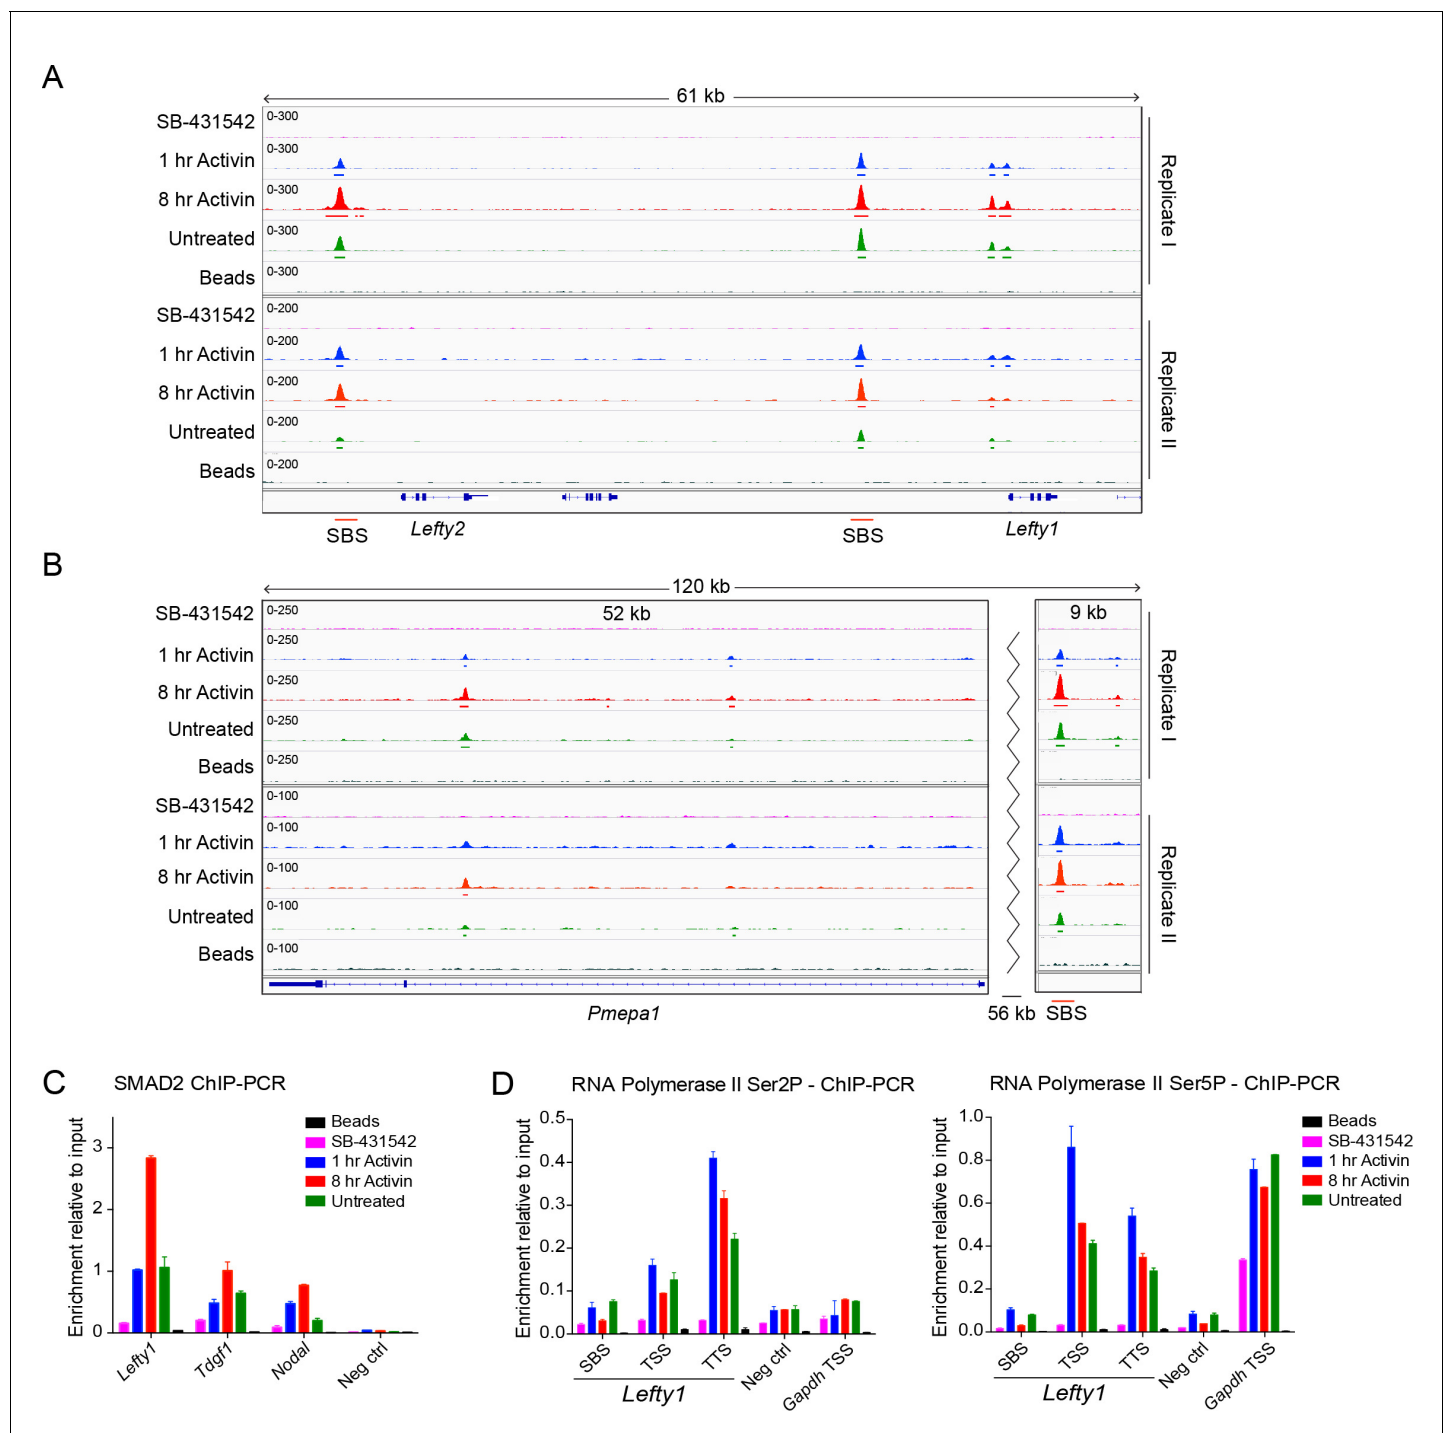

**Figure 2—figure supplement 1.** Characterization of SMAD2 and Pol II binding in response to Activin signaling. (A and B) IGV browser displays over the *Lefty1/Lefty2* locus (A) or *Pmepa1* locus (B) for the 2 replicates of the SMAD2 ChIP-seq experiment to show consistency between duplicates. The tracks and MACS-called peaks for SMAD2 are shown. The conditions are as in **Figure 2A**. SMAD2 binding sites (SBSs) that are subsequently analyzed in the paper are indicated with a red line. (C) SMAD2 ChIP-PCR validations performed in the same treatment conditions as the ChIP-seq experiment for selected SBSs found near target genes (*Lefty1*, *Tdgf1*, *Nodal*). The negative control (Neg ctrl) region primers amplify an intergenic region on Chromosome 5 devoid of detectable SMAD2 binding. A representative experiment is shown (mean  $\pm$  SD). (D) ChIP-PCR validations of Pol II Ser2P and Ser5P on the *Lefty1* gene using the same treatment conditions as the ChIP-seq experiment, showing enrichment at the SBS, TSS and TTS sites relative to a negative control (Neg ctrl) region and the *Gapdh* TSS. A representative experiment is shown (mean  $\pm$  SD).

DOI: 10.7554/eLife.22474.009



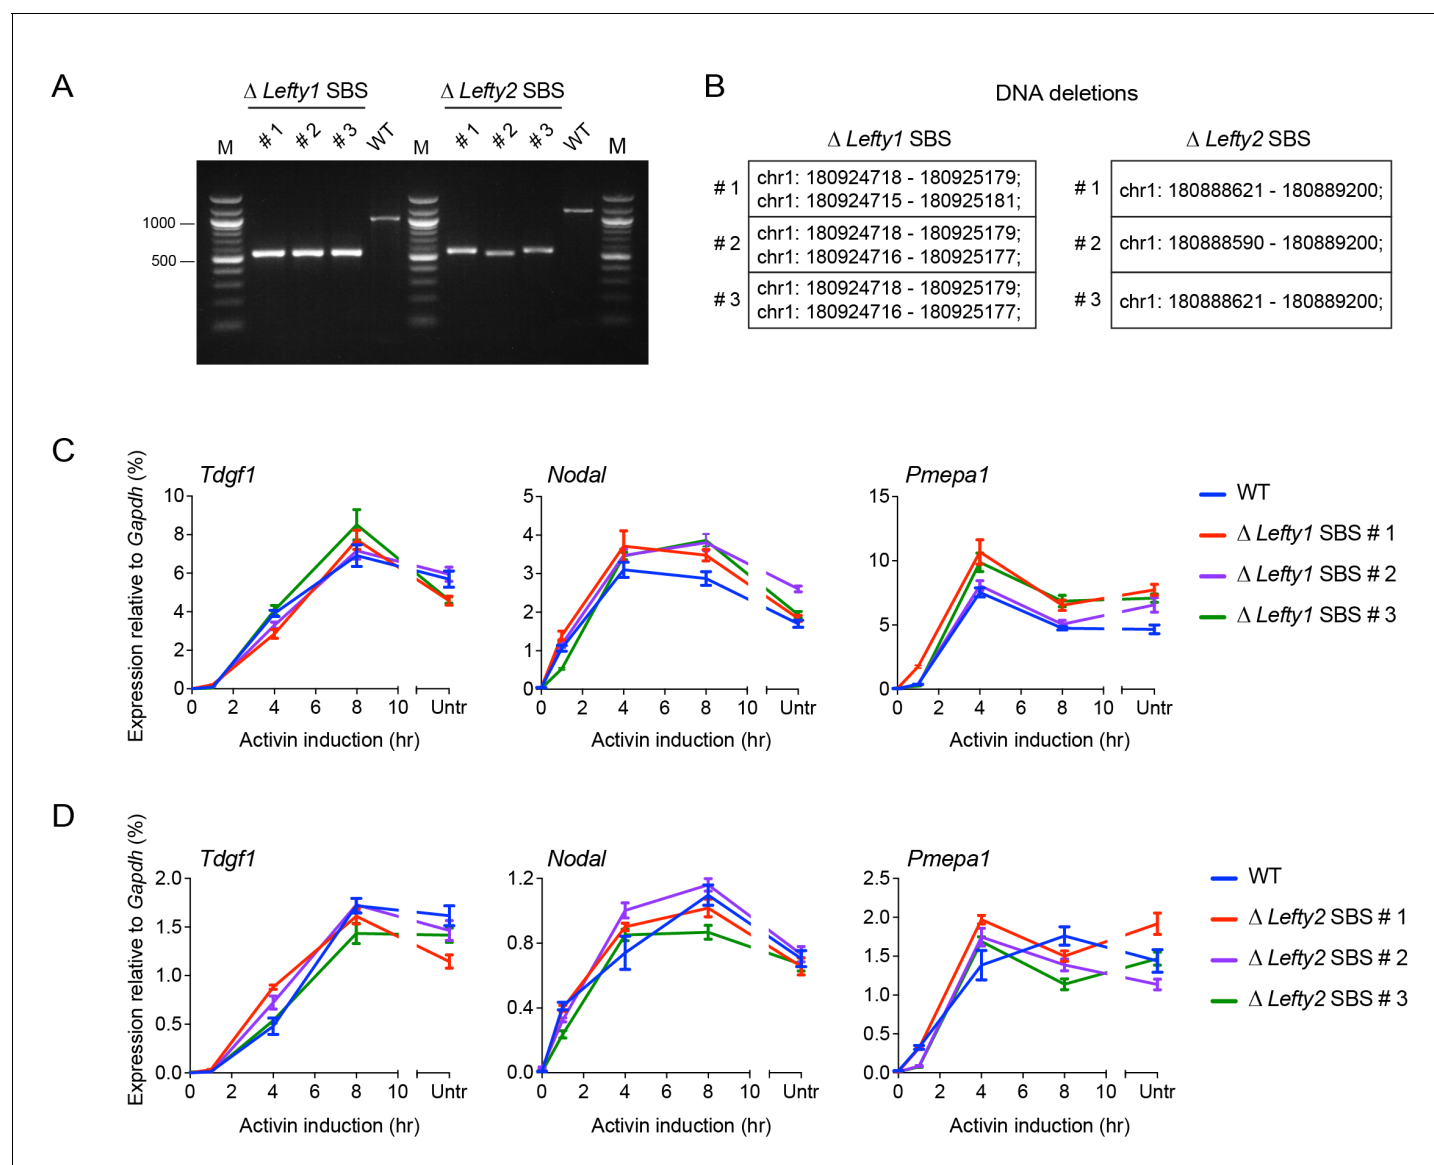

**Figure 2—figure supplement 2.** CRISPR/Cas9-induced deletion of the *Lefty1* and *Lefty2* upstream SBSs. (A) Characterization of the P19 clones deleted for *Lefty1* and *Lefty2* upstream SBSs. Three individual clones are shown for each deletion. Fragments were amplified from genomic DNA by PCR using primers flanking the positions of the guide RNAs. Wild type genomic DNA was used as a control. M, 100 bp DNA ladder. (B) DNA regions deleted in the individual clones. In all cases the clones are compound heterozygotes. In the case of *Lefty2*, the deletions are the same on both alleles of the different clones, but the flanking sequences are not identical. (C and D) qPCR for the genes shown in wild type (WT) P19 cells and in the clones deleted for *Lefty1* (C) and *Lefty2* (D) upstream SBSs. The cells were either untreated (Untr) or incubated overnight with SB-431542, washed out, then replaced with full media containing Activin for the times shown. Representative experiments are shown (mean  $\pm$  SD).

DOI: [10.7554/eLife.22474.010](https://doi.org/10.7554/eLife.22474.010)

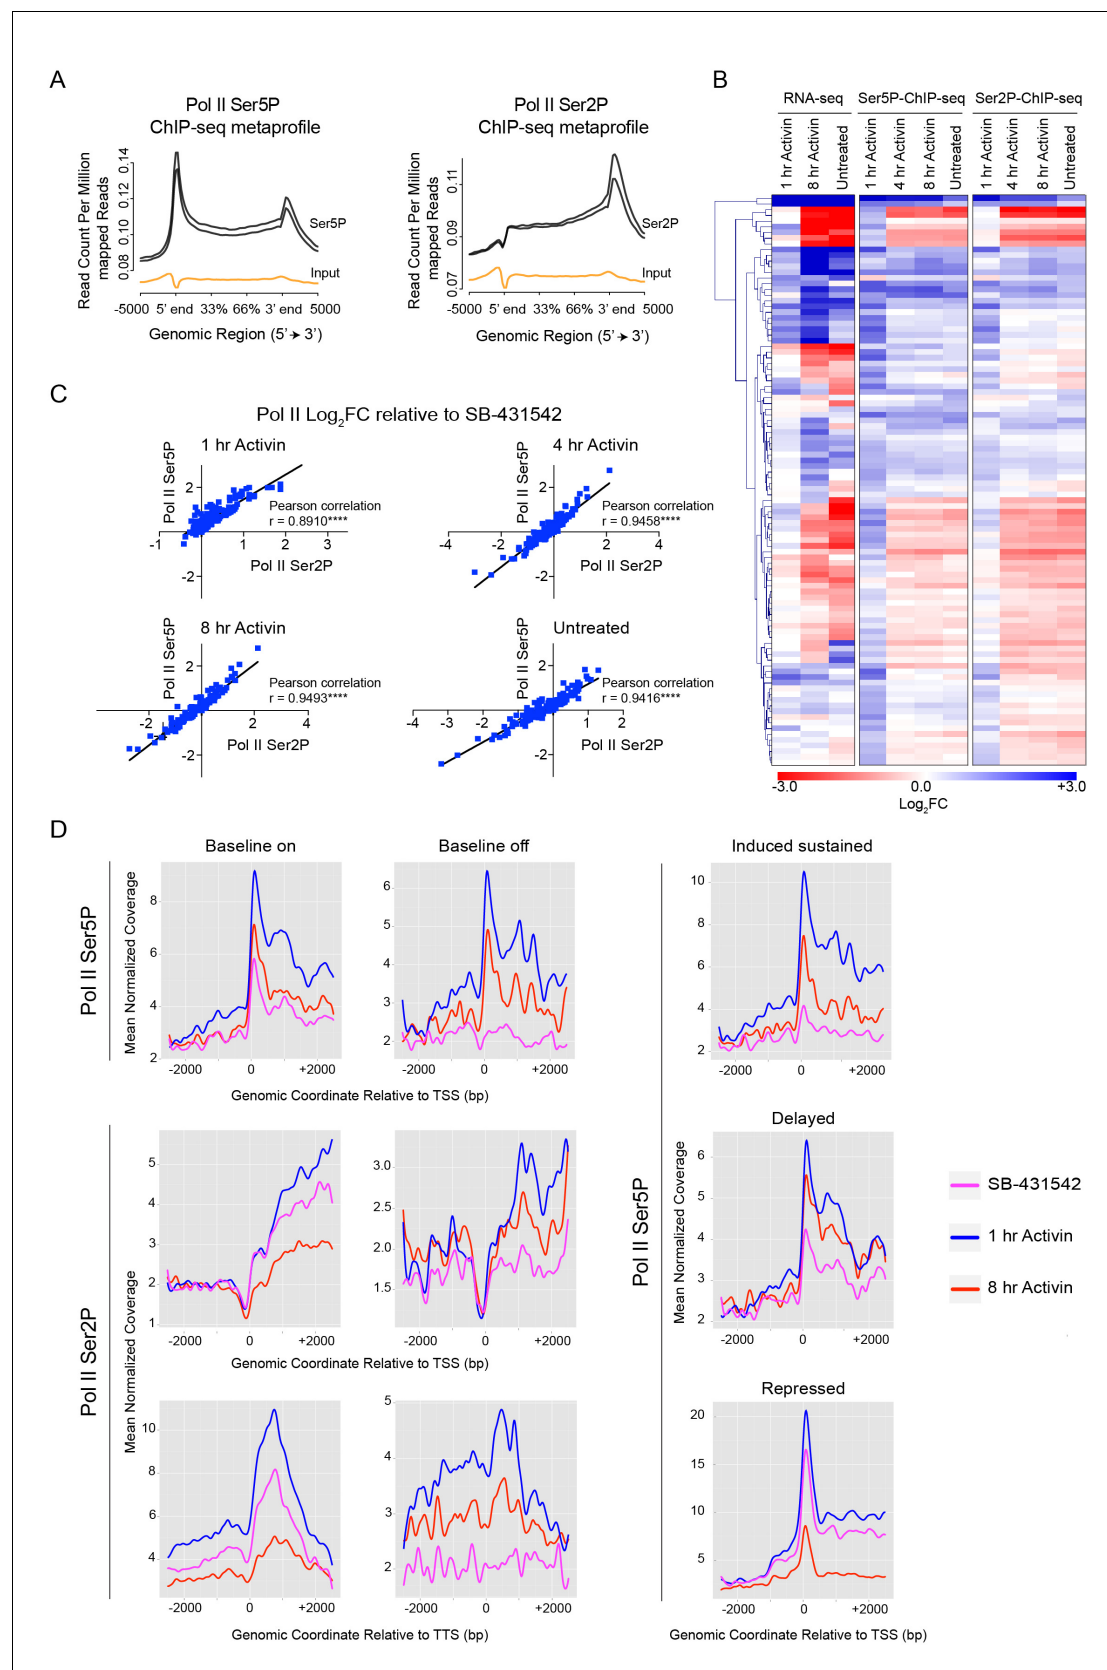

**Figure 3.** Activin-SMAD2 signaling regulates Pol II via de novo recruitment. (A) Average metaprofiles for each of two replicates from the 1 hr Activin sample of the ChIP-seq for Ser5P or Ser2P isoforms of Pol II. Normalized read count across all genes is shown. The orange line denotes the input. (B) Figure 3 continued on next page

*Figure 3 continued*

Activin-SMAD2 target genes from the high confidence dataset showing differential Pol II binding were hierarchically-clustered and the  $\log_2$ FC relative to SB-431542 for mean normalized read depth for Pol II Ser 5P and Pol II Ser2P is displayed in a side-by-side comparison with the transcript levels (determined by RNA-seq). (C) Correlations of the  $\log_2$ FC values of affected target genes for Pol II Ser2P and Ser5P for each individual time point. (D) Metaprofiles generated for Pol II Ser5P or Pol II Ser2P ChIP-seq data across a 5 kb window surrounding the TSS or the TTS for indicated subsets of target genes. Each colored line traces the normalized read depth of Pol II Ser5P or Pol II Ser2P in each condition.

DOI: [10.7554/eLife.22474.011](https://doi.org/10.7554/eLife.22474.011)

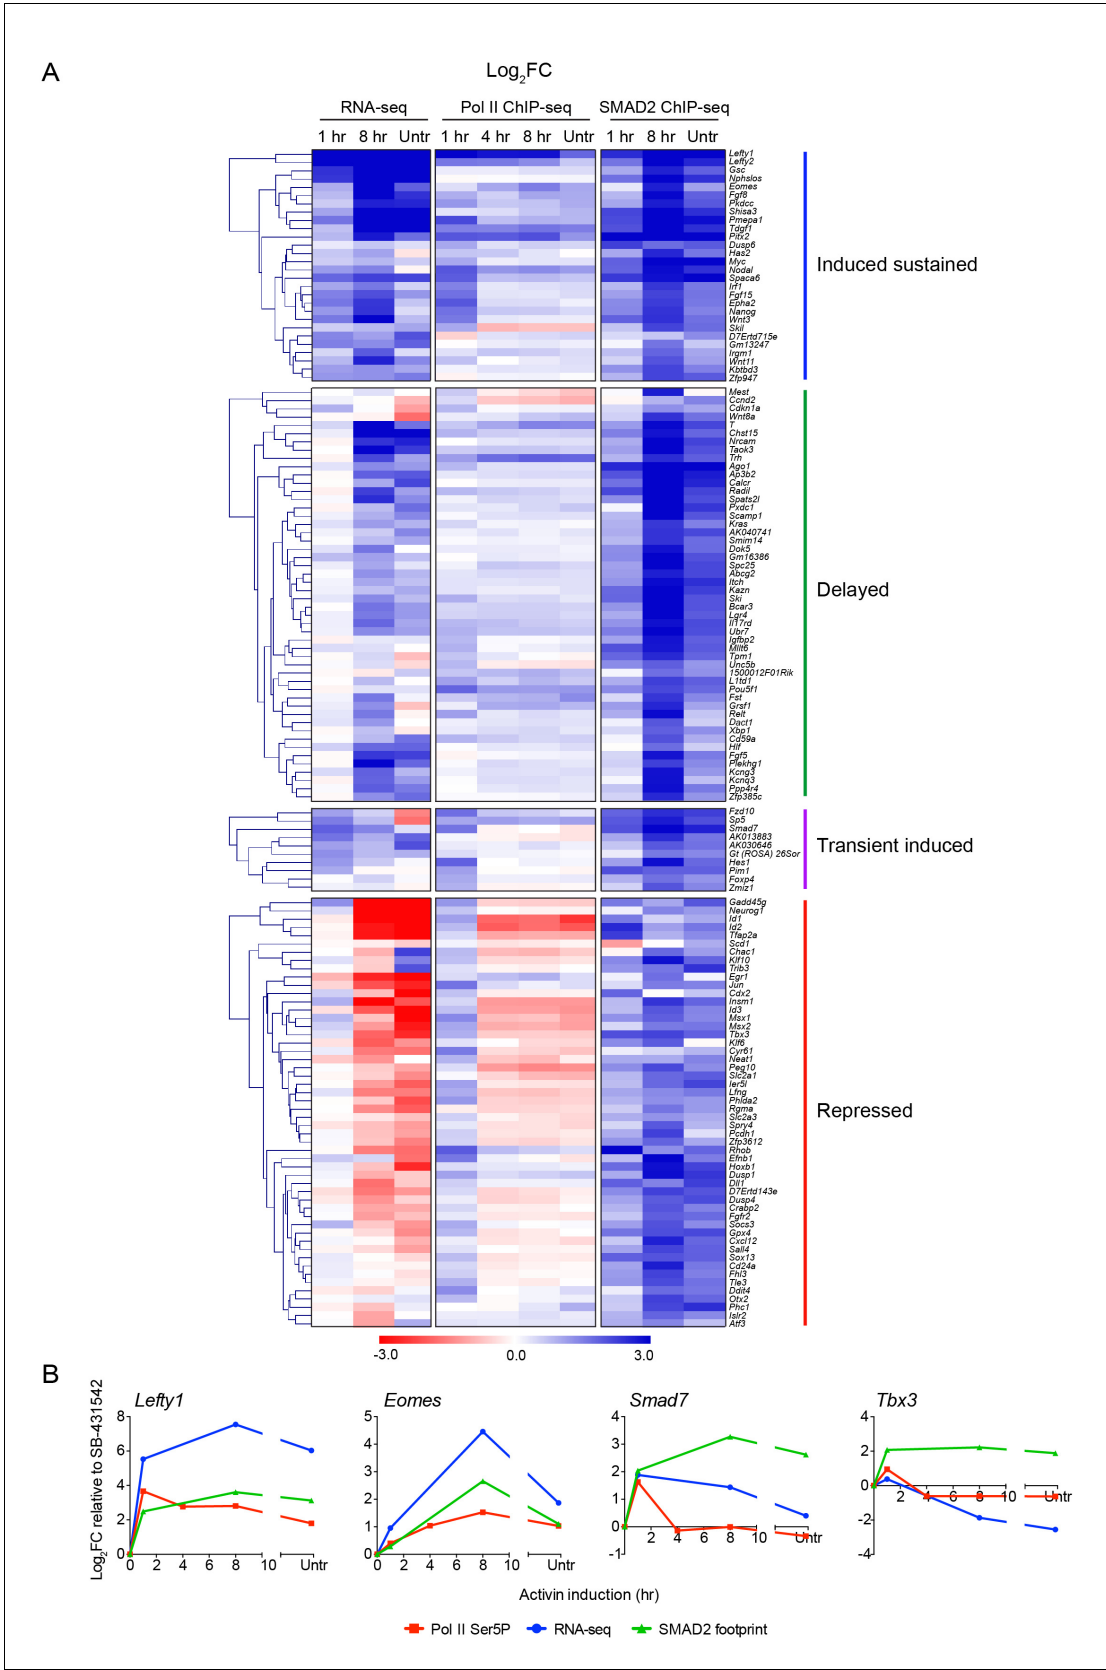

**Figure 4.** Localized SMAD2 chromatin binding does not directly correlate with transcription. (A) Hierarchically-clustered heatmaps for each of the four different kinetic groups of target genes showing log<sub>2</sub>FC values relative to SB-431542 for gene expression as determined by RNA-seq (left), mean Figure 4 continued on next page

*Figure 4 continued*

normalized read depth for Pol II Ser5P (middle) and SMAD2 footprint (right). Untr, untreated. (B) Transcriptional dynamics of different target genes (*Lefty1*, *Eomes*, *Smad7*, *Tbx3*). (For IGV browser displays, see **Figure 2A** and **Figure 4—figure supplement 1**). Plotted are quantifications of transcript levels obtained by RNA-seq, Pol II Ser5P occupancy expressed as mean normalized read depth, and SMAD2 footprint, all depicted as  $\log_2$ FC relative to SB-431542. Untr, untreated.

DOI: [10.7554/eLife.22474.012](https://doi.org/10.7554/eLife.22474.012)

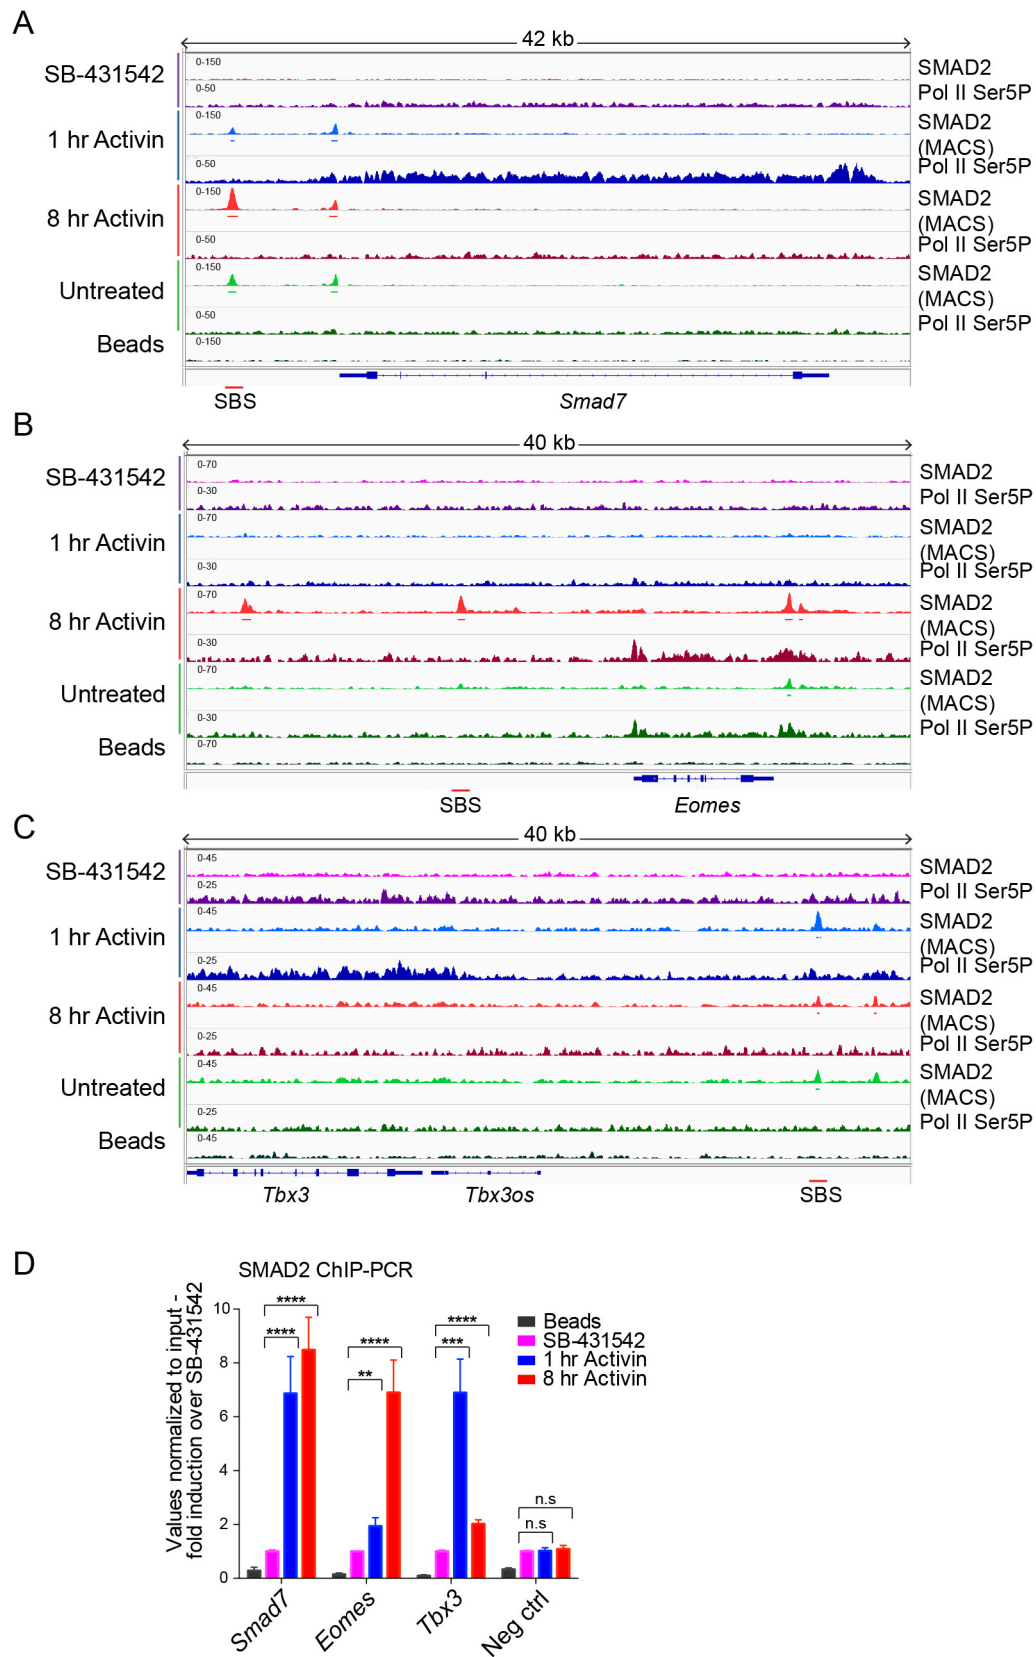

**Figure 4—figure supplement 1.** IGV browser displays of genes and associated peaks showing differential transcription and SMAD2 binding dynamics. (A–C) IGV browser displays over the transiently induced gene *Smad7* (A), *Eomes* (B) that is induced with delayed kinetics, and *Tbx3* (C) which is a gene containing peaks which are more highly enriched at 1 hr than at 8 hr. The tracks and MACS-called peaks for SMAD2, and tracks for Pol II Ser5P are shown. Denoted underneath each panel is the SBS, for which primers were designed for ChIP-PCR. (D) SMAD2 ChIP-PCR performed on SBSs surrounding the indicated genes in the conditions shown. Neg ctrl, negative control. Plotted are the means and SEM of three independent experiments. n.s., not significant; \*\*\*\* corresponds to a p-value of <0.0001; \*\*\* corresponds to a p-value of <0.001; \*\* corresponds to a p-value of <0.01.

DOI: [10.7554/eLife.22474.013](https://doi.org/10.7554/eLife.22474.013)

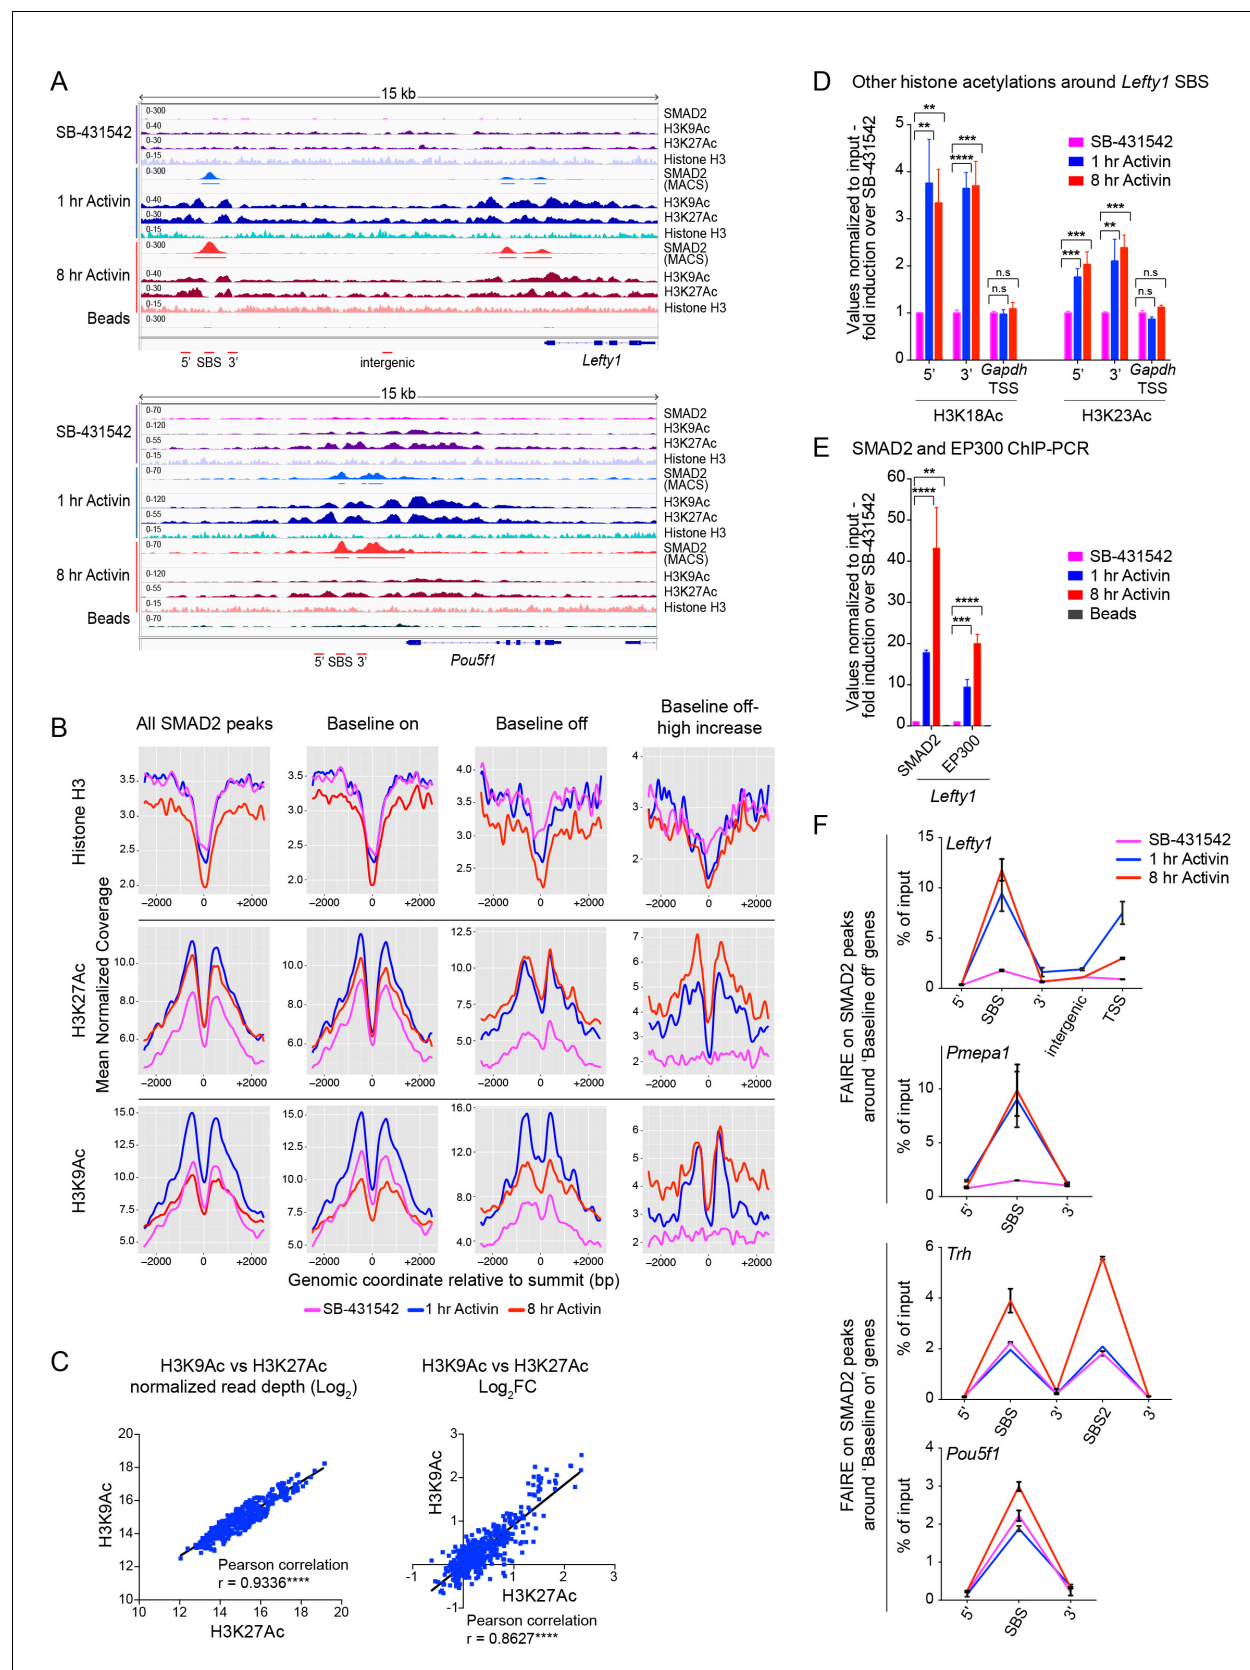

**Figure 5.** Changes in chromatin landscape around SBSs in response to signaling. **(A)** IGV browser displays for the *Lefty1* and *Pou5f1* loci displaying ChIP-seq tracks for SMAD2, H3K9Ac, H3K27Ac and total histone H3 for the indicated treatments. For the SMAD2 ChIP-seq the MACS-called peaks are

Figure 5 continued on next page



## Figure 5 continued

also shown. (B) Metaprofiles denoting coverage of total histone H3, H3K27Ac and H3K9Ac in a 5 kb window surrounding the average summit across SMAD2 consensus peaks. Each line within a plot traces the normalized read depth of H3 or acetylated H3 for each treatment. The left panels show metaprofiles for all 478 SMAD2 peaks, while the other panels only show those regions found near genes which are induced from an 'on' baseline or from an 'off' baseline. The right panels show metaprofiles for the subset of SMAD2 peaks which is associated with genes induced from an 'off' baseline and show changes in H3Ac enrichment from a low baseline as defined in **Figure 6D**. (C) Correlation plots showing normalized read depth ( $\text{Log}_2$ ) (left graph) or  $\text{log}_2\text{FC}$  relative to SB-431542 (right graph) for H3K27Ac and H3K9Ac values, detected in the 1 hr Activin sample. (D) ChIP-PCR on the nucleosomes flanking the *Lefty1* SBS (A) for H3K18Ac and H3K23Ac in P19 cells treated as indicated. Plotted are the means and SEM of three independent experiments. (E) ChIP-PCR showing enrichment of both SMAD2 and EP300 at the *Lefty1* SBS in P19s treated as indicated. Plotted are the means and SEM of four independent experiments. (F) FAIRE-ChIP was performed on SB-431542, 1 hr Activin or 8 hr Activin-treated P19 cells. Soluble chromatin fractions were assayed for enrichment of the specific regions indicated which are highlighted in the IGV browser displays in panel (A) and **Figure 2—figure supplement 1** and **Figure 5—figure supplement 1**. A representative experiment is shown (means  $\pm$  SD). See **Figure 5—figure supplement 1B** for the averages of the three experiments and the statistical analyses. In D and E, n.s., not significant; \*\*\*\* corresponds to a p value of  $< 0.0001$ ; \*\*\* corresponds to a p value of  $< 0.001$  and \*\* corresponds to a p value of  $< 0.01$ .

DOI: [10.7554/eLife.22474.014](https://doi.org/10.7554/eLife.22474.014)

The following source data is available for figure 5:

**Source data 1.** H3K27Ac and H3K9Ac values detected in the 1 hr Activin sample.

DOI: [10.7554/eLife.22474.015](https://doi.org/10.7554/eLife.22474.015)

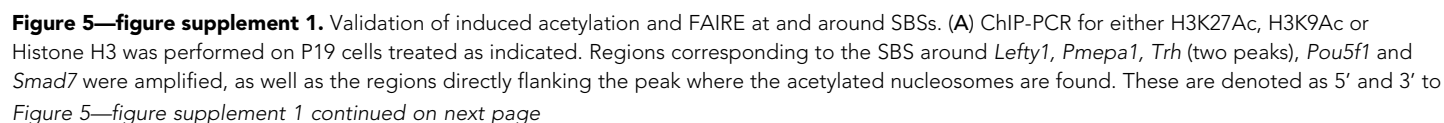

*Figure 5—figure supplement 1 continued*

SBS. For *Lefty1* and *Smad7*, enrichment of H3Ac was also determined at the TSS and in the region between the peak and TSS (intergenic). All amplified genomic regions are denoted in the IGV browser displays in **Figure 5A** and **Figure 5—figure supplement 2**. Enrichment of the modifications is also shown on the *Gapdh* TSS as a control (Bottom panels). A representative experiment is shown (means  $\pm$  SD). (B) P19 cells were treated as indicated. The nucleosomes at the selected SBSs were assayed for FAIRE-PCR. Plotted are the means and SEM of three independent experiments. n.s., not significant; \*\*\*\* corresponds to a p value of  $< 0.0001$ ; \*\*\* corresponds to a p value of  $< 0.001$ ; \*\* corresponds to a p value of  $< 0.01$ .

DOI: [10.7554/eLife.22474.016](https://doi.org/10.7554/eLife.22474.016)

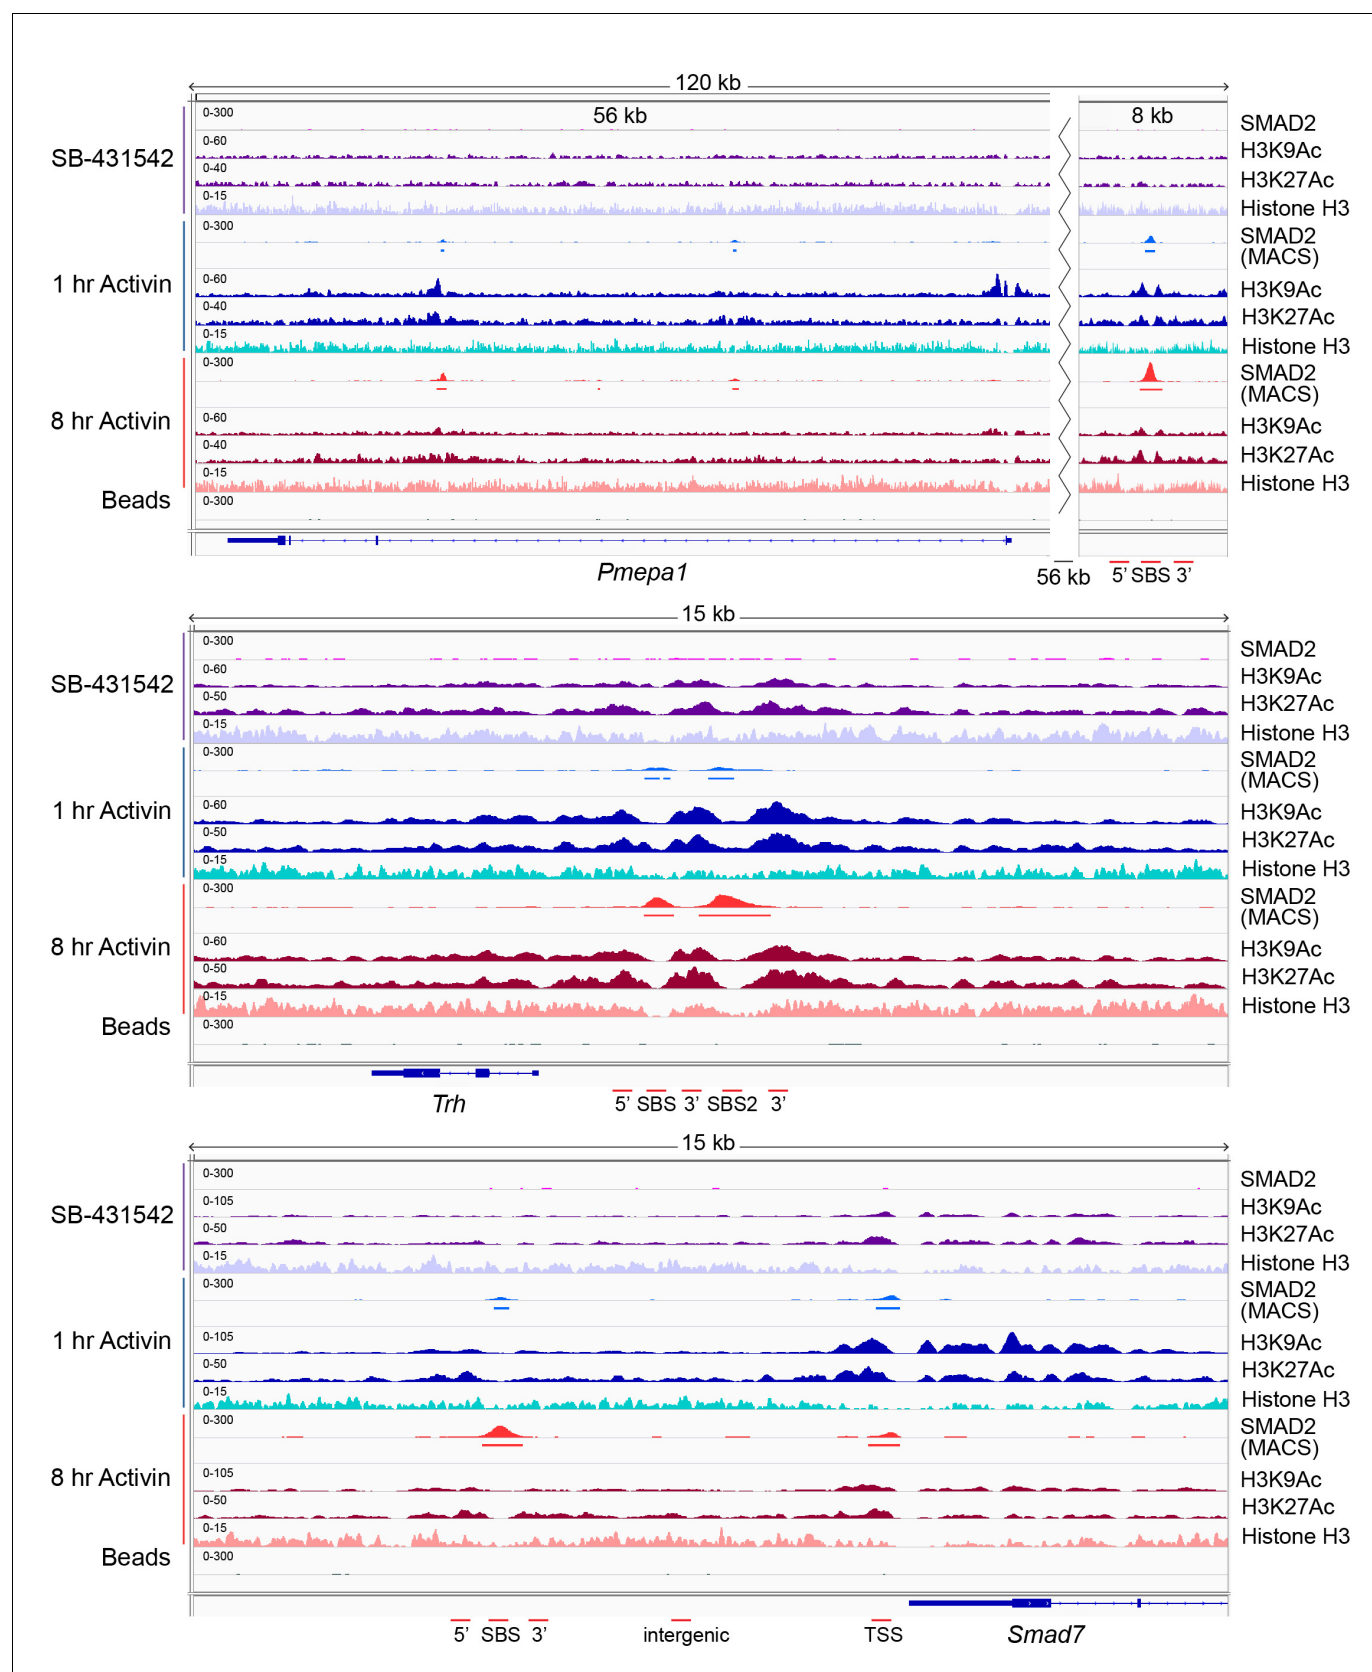

**Figure 5—figure supplement 2.** IGV browser displays of genes and associated peaks showing changes in chromatin landscape. IGV browser displays over the *Pmepa1*, *Trh* and *Smad7* loci. Displayed are ChIP-seq tracks for SMAD2, H3K9Ac, H3K27Ac and total histone H3 in P19 cells which were

Figure 5—figure supplement 2 continued on next page

Figure 5—figure supplement 2 continued

treated as indicated. MACS-called peaks for SMAD2 are also shown, and the regions amplified in ChIP-PCR (**Figure 5—figure supplement 1**) are denoted below each panel.

DOI: [10.7554/eLife.22474.017](https://doi.org/10.7554/eLife.22474.017)

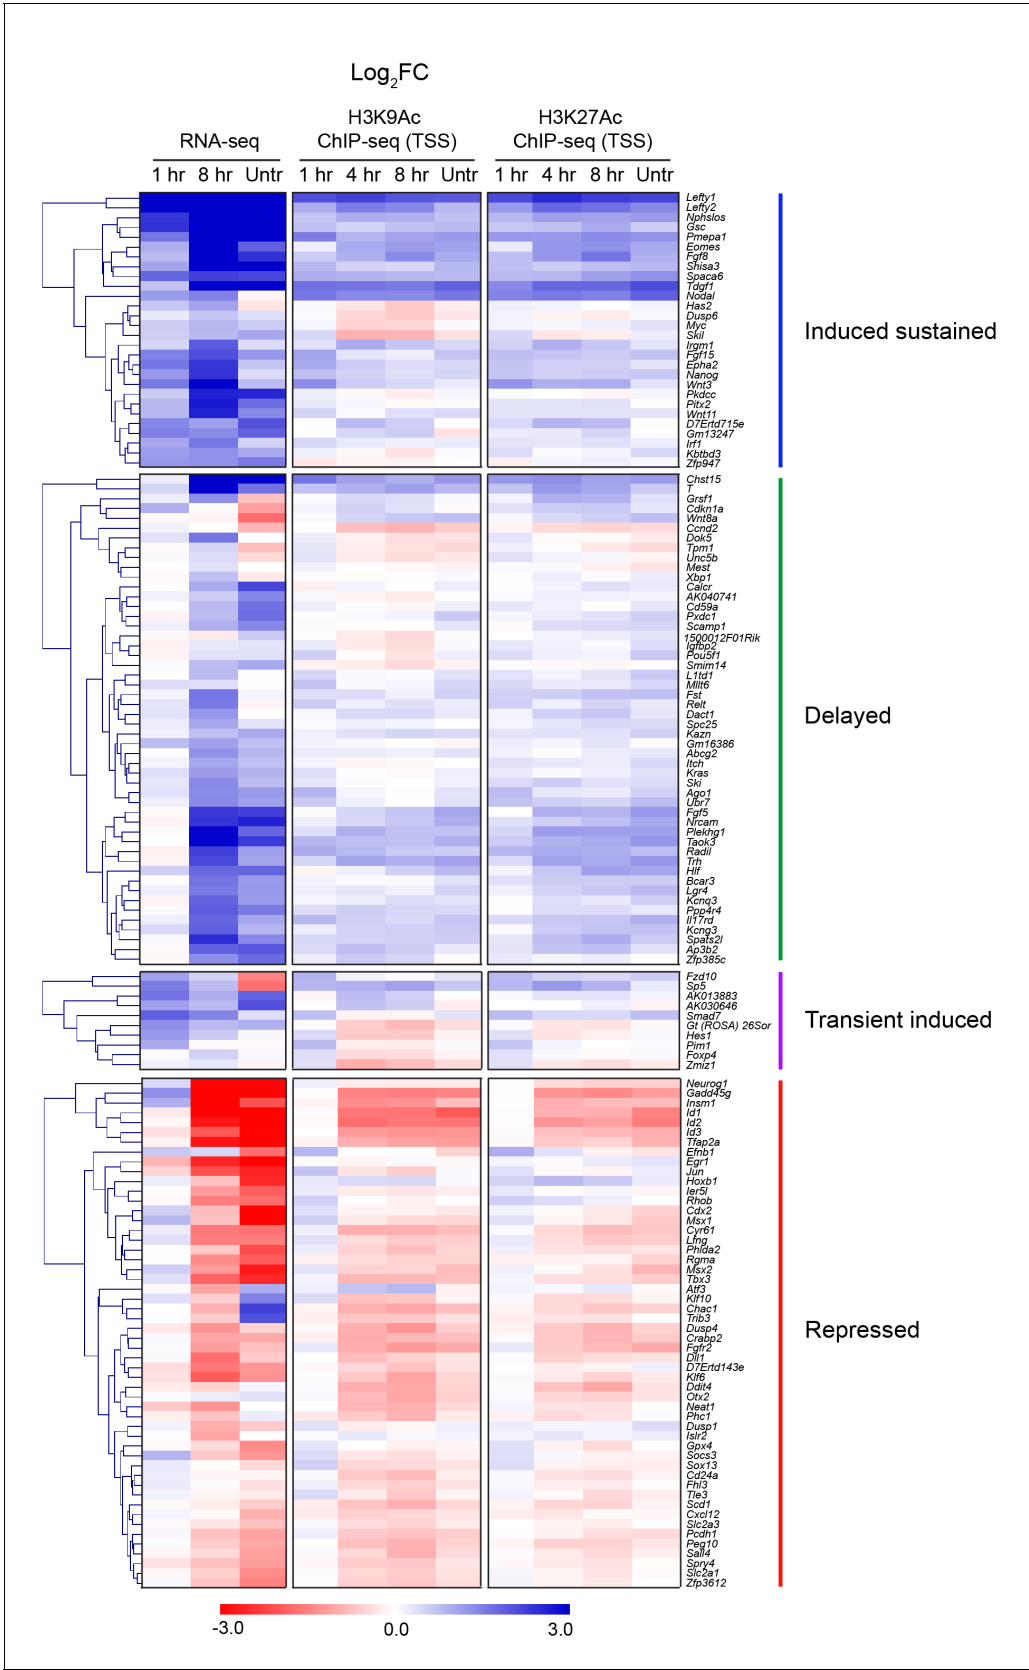

**Figure 5—figure supplement 3.** Correlation between histone H3 acetylation changes and gene expression. Hierarchically-clustered heatmaps for each of the four different kinetic groups of target genes. Color intensity denotes  $\text{log}_2\text{FC}$  values relative to SB-431542 for either gene expression as shown in Figure 5—figure supplement 3 continued on next page

Figure 5—figure supplement 3 continued

determined by RNA-seq (left), or mean normalized read depth for H3K9Ac (middle) or H3K27Ac (right) over a 5 kb window surrounding the annotated TSS of each target gene. Untr, untreated.

DOI: [10.7554/eLife.22474.018](https://doi.org/10.7554/eLife.22474.018)

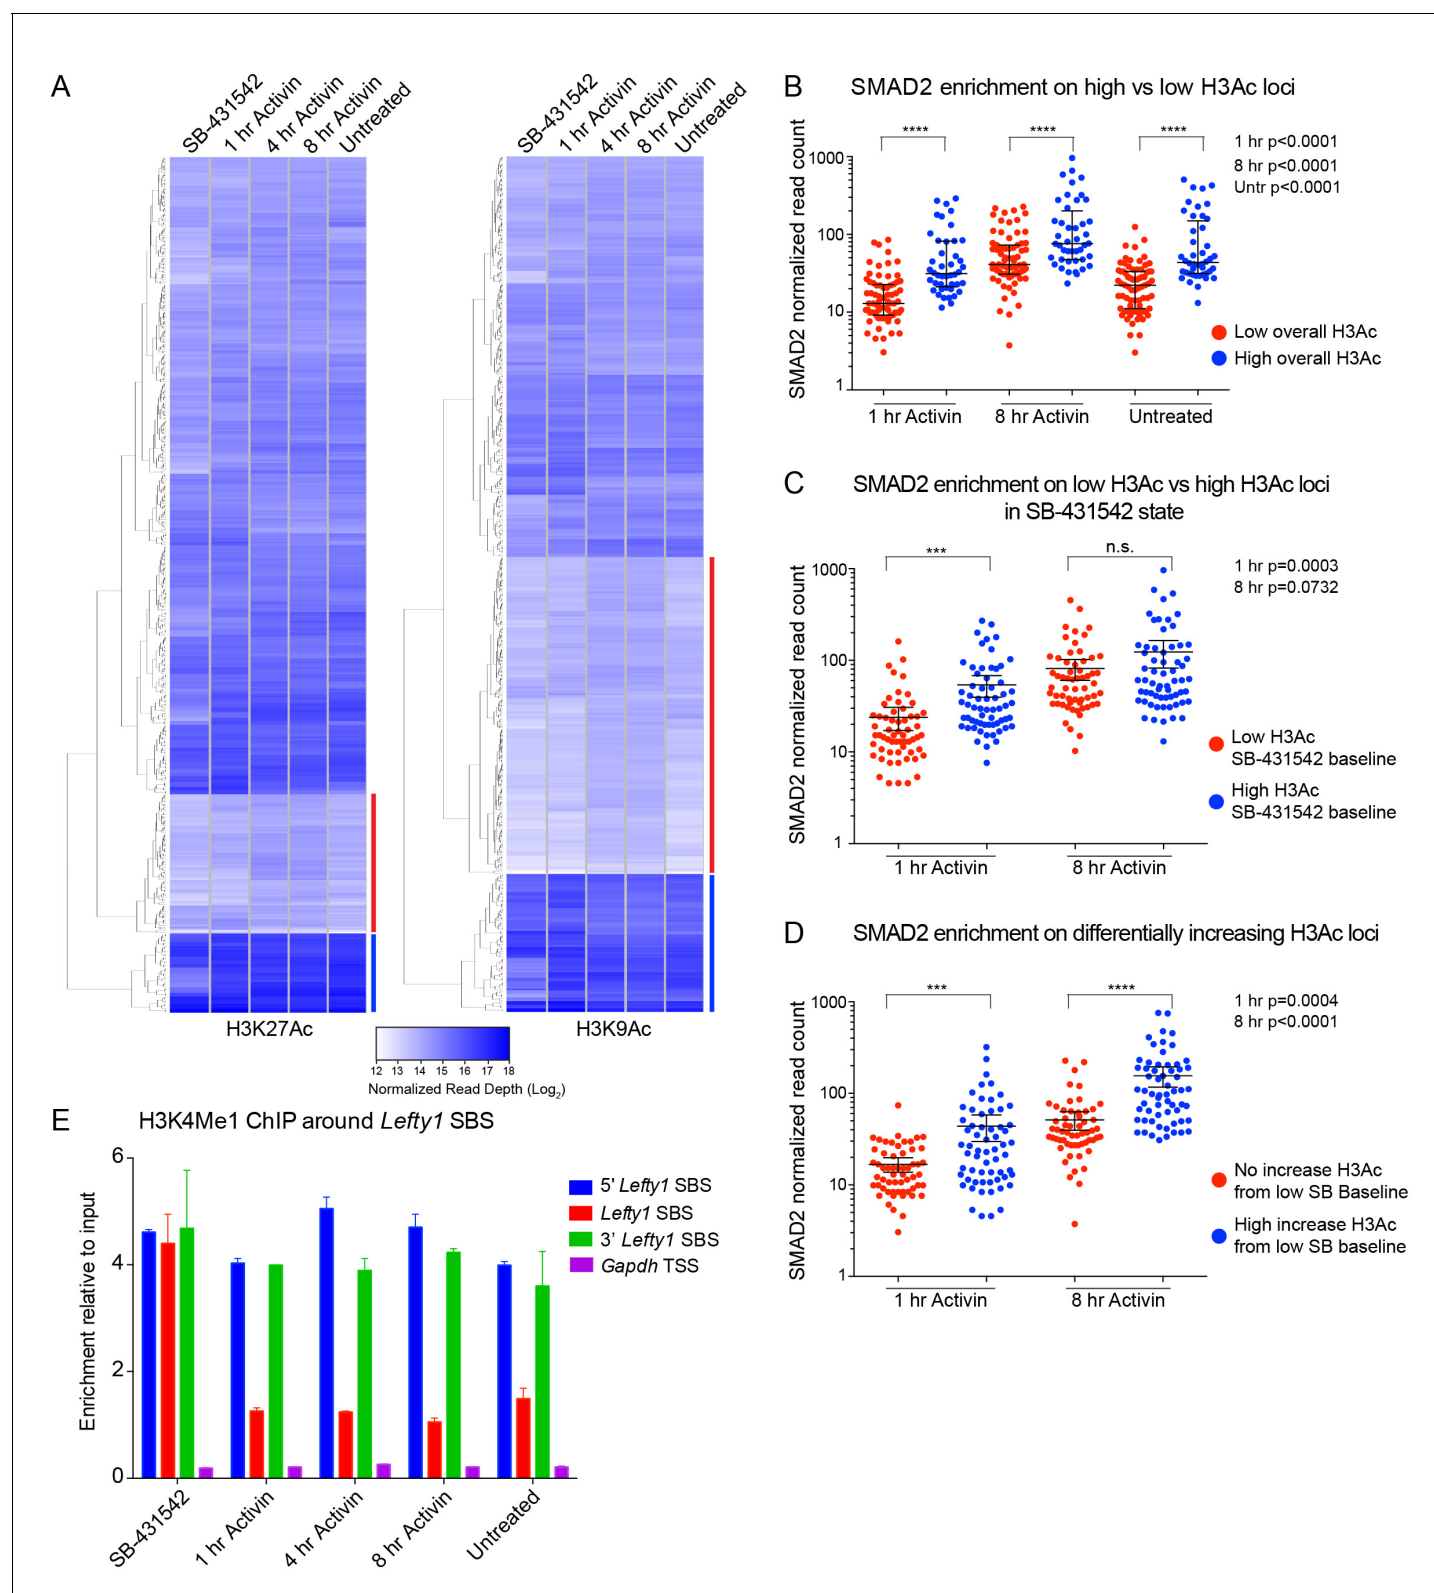

**Figure 6.** Relationship between chromatin state and SMAD2 binding strength. (A) Hierarchical clustering of average read intensity ( $\text{Log}_2$ ) over a 5 kb window surrounding all SMAD2 consensus peak summits for each indicated treatment is shown for H3K27Ac (left panel) and H3K9Ac (right panel). Red line, peaks associated with low overall acetylation; blue line, peaks found in highly acetylated chromatin. (B–D) Correlation between normalized SMAD2 read counts and H3 acetylation state. The SMAD2 read counts over consensus peaks in either the ‘low overall acetylation’ (red) or ‘high overall acetylation’ (blue) loci are shown. (E) H3K4Me1 ChIP enrichment around *Lefty1* SBS. The enrichment relative to input is shown for each treatment. Figure 6 continued on next page



*Figure 6 continued*

acetylation' (blue) category were plotted for the three conditions (B). The SMAD2 read counts over consensus peaks that were defined as either low H3Ac or high H3Ac in the SB-431542 state were plotted for the 1 hr and 8 hr Activin conditions (C). The SMAD2 read counts over subsets of loci selected based on changes in H3Ac enrichment from a low baseline (D). In all cases the black bars indicate the mean and 95% confidence interval. n.s., not significant. The p-values are given in the plots. (E) ChIP-PCR for H3K4Me1 for the nucleosomes at and flanking the *Lefty1* SBS or a control region within the *Gapdh* coding locus. A representative experiment is shown (means  $\pm$  SD).

DOI: [10.7554/eLife.22474.019](https://doi.org/10.7554/eLife.22474.019)

The following source data is available for figure 6:

**Source data 1.** Average read intensity over a 5 kb window surrounding all SMAD2 consensus peak summits for H3K27Ac and H3K9Ac.

DOI: [10.7554/eLife.22474.020](https://doi.org/10.7554/eLife.22474.020)

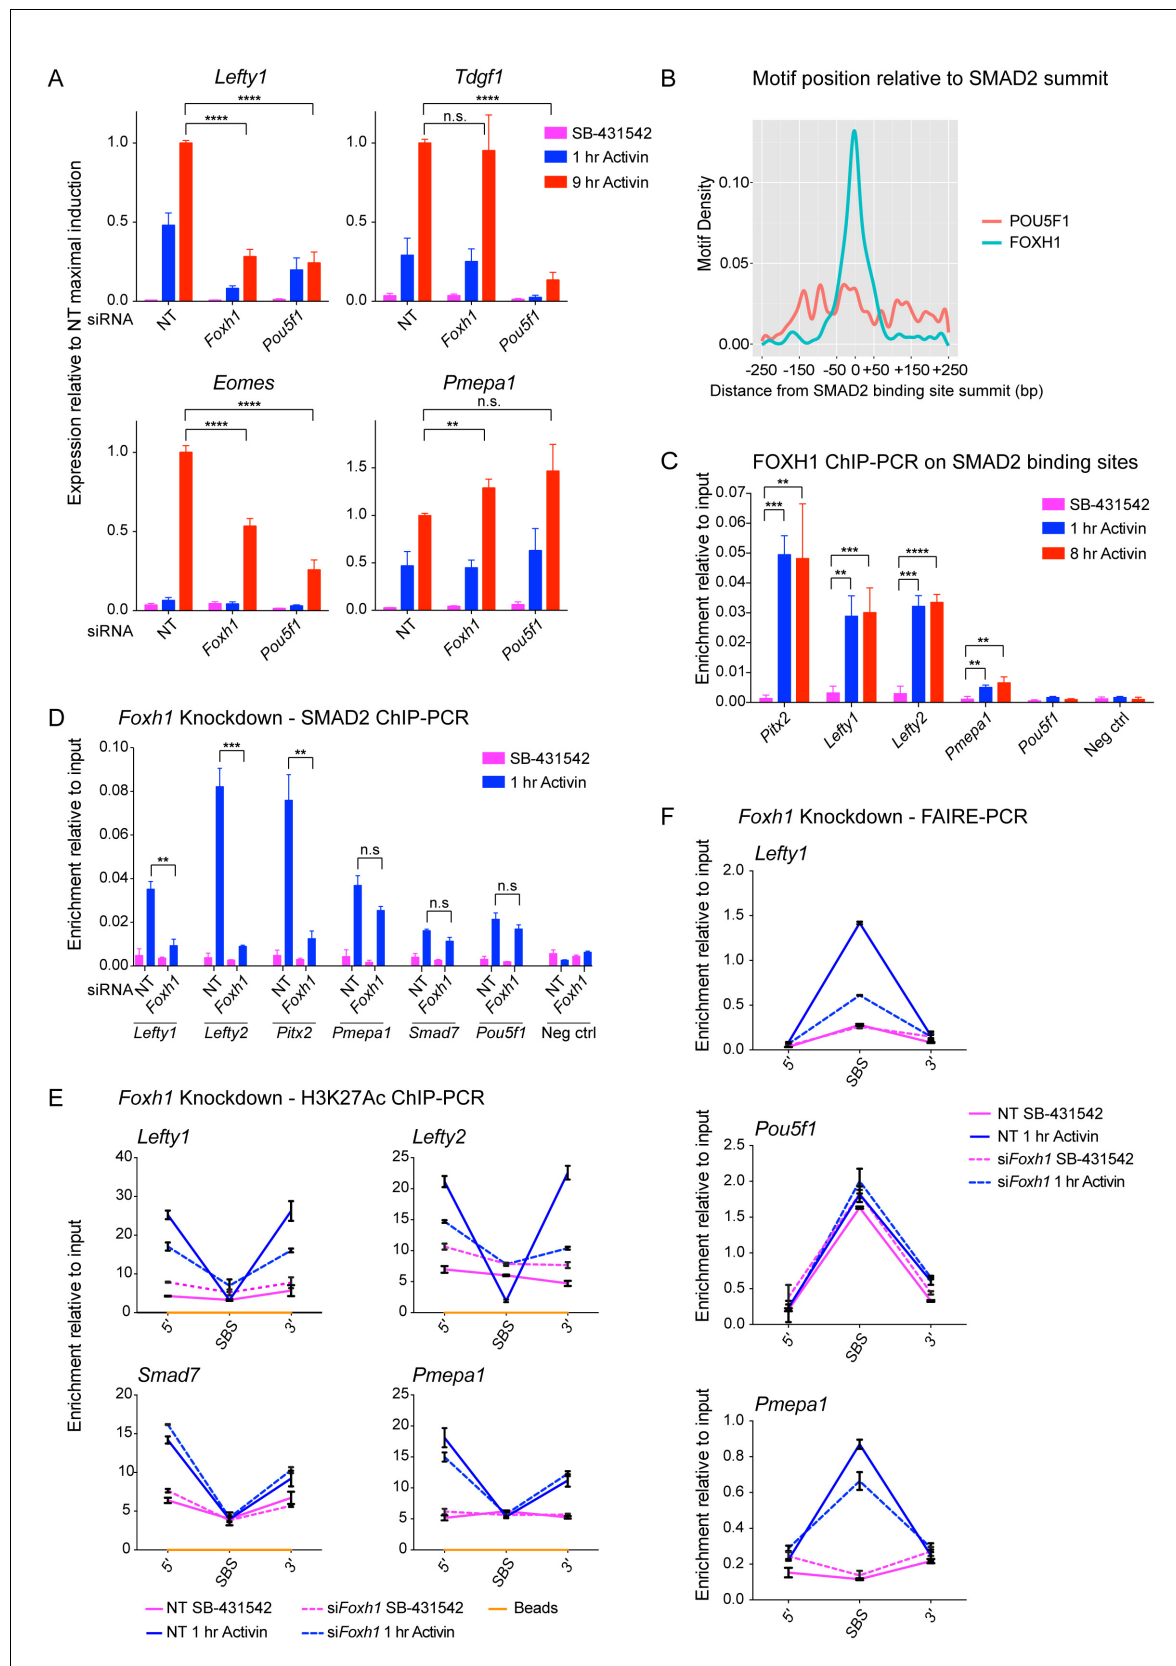

**Figure 7.** FOXH1 is required for SMAD2 recruitment and nucleosome remodeling at a subset of Activin target genes. (A) P19 cells were transfected with siRNAs directed against either *Pou5f1* or *Foxh1*, along with a non-targeting control (NT). Following signal inhibition or Activin induction, qPCR was

Figure 7 continued on next page

*Figure 7 continued*

performed for the genes shown. Plotted are the means and SEM of three independent experiments performed in duplicate of gene expression values normalized to endogenous *Gapdh* values. (B) The position of FOXH1 or POU5F1 motifs (regardless of orientation or strand) was plotted relative to the summit of all the peaks used in **Figure 7—figure supplement 1A**. (C) ChIP-PCR for FOXH1 at the indicated SBSs and negative control (Neg ctrl) region using P19 cells in the conditions shown. Plotted are the means and SEM of two independent experiments performed in duplicate. (D–F) P19 cells were transfected with either non-targeting (NT) or *Foxh1* siRNAs, which were then signal inhibited (SB-431542) or stimulated with Activin for 1 hr after SB-431542 washout. They were assayed for SMAD2 ChIP-PCR (D), H3K27Ac ChIP-PCR (E) or FAIRE-PCR (F) on the selected SBSs indicated. Plotted in D are the means and SEM of three independent experiments. Neg ctrl, negative control. The data in E and F are from a representative experiment of three (means  $\pm$  SD). See **Figure 7—figure supplement 4** for the averages of the three experiments and the statistical analyses. In A, C and D, n.s., not significant; \*\*\*\* corresponds to a p value of  $< 0.0001$ ; \*\*\* corresponds to p value of  $< 0.001$ ; \*\* corresponds to a p value of  $< 0.01$ .

DOI: [10.7554/eLife.22474.021](https://doi.org/10.7554/eLife.22474.021)

The following source data is available for figure 7:

**Source data 1.** The position of FOXH1 or POU5F1 motifs relative to the summit of all the consensus peaks.

DOI: [10.7554/eLife.22474.022](https://doi.org/10.7554/eLife.22474.022)

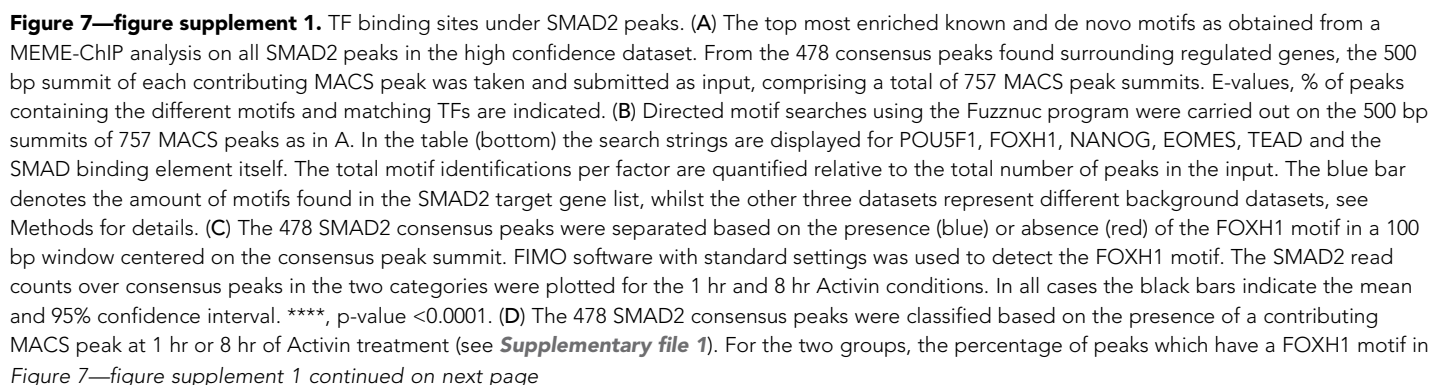

Figure 7—figure supplement 1 continued

a 100 bp window centered on the consensus peak summit is reported in blue. Note that this percentage is significantly different between the 1 hr group and the 8 hr group. The p-value was calculated using an un-paired Chi-square test, 95% confidence interval.

DOI: [10.7554/eLife.22474.023](https://doi.org/10.7554/eLife.22474.023)

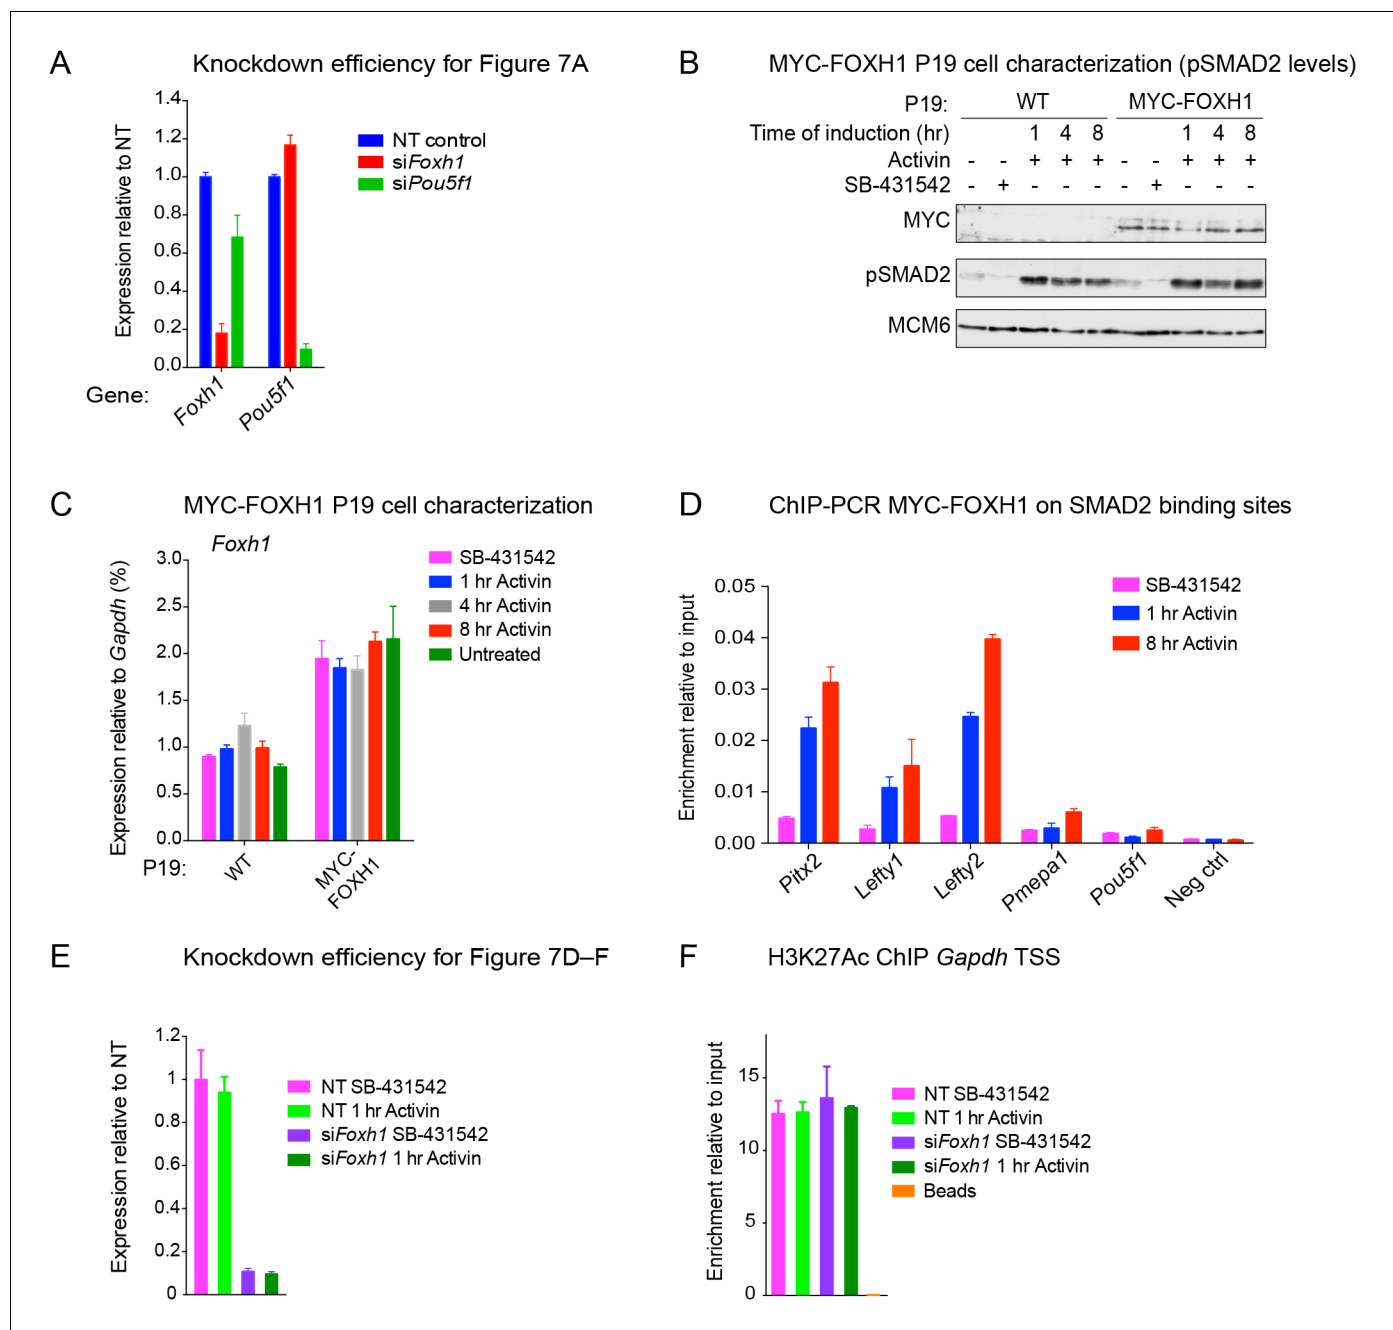

**Figure 7—figure supplement 2.** The role of FOXH1 in SMAD2-mediated transcription. (A) For experiment shown in **Figure 7A**, where gene expression following siRNA-mediated knockdown of *Foxh1* or *Pou5f1* was assessed, qPCR was performed on the untreated samples to determine expression levels of *Pou5f1* and *Foxh1* itself, as quantified relative to endogenous *Gapdh*. Means  $\pm$  SEM of three independent experiments performed in duplicate are shown. NT, non-targeting. (B) Lysates were collected from wild type P19 cells or P19 cells stably expressing MYC-tagged FOXH1, treated for the indicated times with either 20 ng/ml Activin and/or 10  $\mu$ M SB-431542. Shown are Western blots for MYC, pSMAD2 and MCM6 (loading). Note that expression of MYC-FOXH1 does not alter the kinetics of pSMAD2 induction. (C) qPCR for *Foxh1* was performed on samples collected from either wild type P19 cells or P19 cells stably expressing MYC-tagged FOXH1 as in (B), treated as indicated. Shown are expression levels of *Foxh1* determined relative to *Gapdh*. Note that MYC-FOXH1 is expressed at roughly endogenous levels. A representative experiment (means  $\pm$  SD) is shown. (D) ChIP-PCR for MYC-FOXH1 at the indicated SBSs and negative control (Neg ctrl) region using the P19 cells stably expressing MYC-tagged FOXH1 as in (B) in the conditions shown. A representative experiment (means  $\pm$  SD) is shown. (E) qPCR for *Foxh1* performed on non-targeting (NT) control or *Foxh1* siRNA-transfected cells used for the experiments shown in **Figure 7D–F** to show the efficiency of knockdown. Values were normalized to endogenous *Gapdh*. A representative experiment (means  $\pm$  SD) is shown. (F) A control H3K27Ac ChIP-PCR on the *Gapdh* TSS from the samples used in **Figure 7E**. A representative experiment (means  $\pm$  SD) is shown.

Figure 7—figure supplement 2 continued on next page

Figure 7—figure supplement 2 continued

DOI: [10.7554/eLife.22474.024](https://doi.org/10.7554/eLife.22474.024)

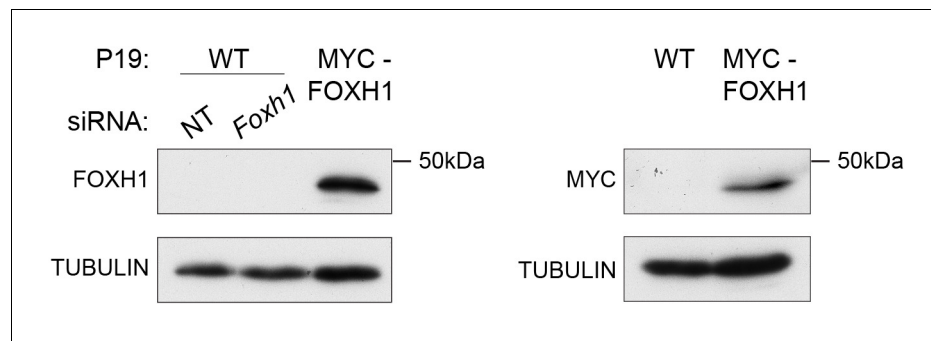

**Figure 7—figure supplement 3.** Characterization of the in-house anti FOXH1 antibody. Lysates were collected from wild type P19 cells transfected with either non-targeting (NT) or Foxh1 siRNAs and from P19 cells stably expressing MYC-tagged FOXH1 (see **Figure 7—figure supplement 2B–D**). Shown are Western blots for FOXH1, MYC and TUBULIN (loading). Note that a band at the predicted molecular size of FOXH1 is detected in the P19 MYC-FOXH1 sample when incubating the blot with either the in-house anti FOXH1 antibody (left panel) or an anti MYC antibody (right panel). No bands are detected in wild type P19 samples by anti FOXH1 in-house antibody. Thus the in house anti FOXH1 antibody detects MYC-tagged FOXH1, but not endogenous FOXH1 in Western blot analysis.

DOI: [10.7554/eLife.22474.025](https://doi.org/10.7554/eLife.22474.025)



## A H3K27Ac enrichment

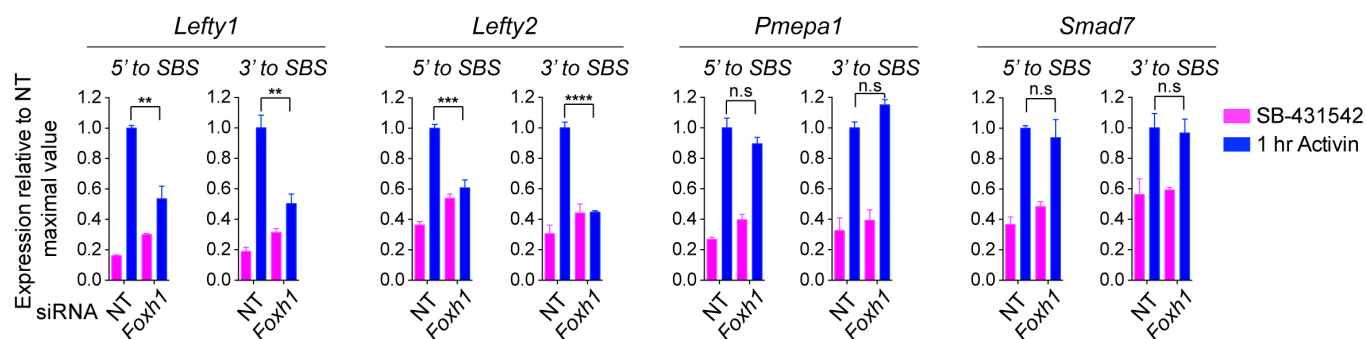

## B FAIRE

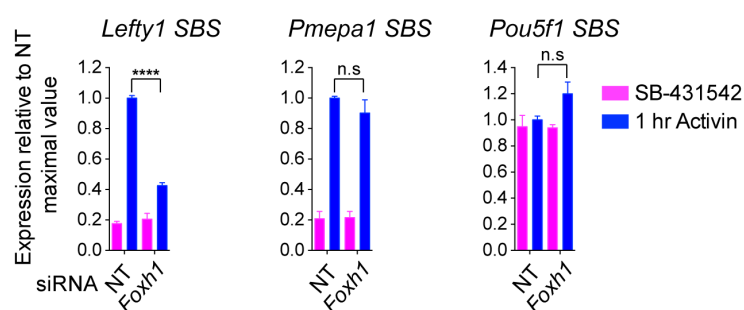

**Figure 7—figure supplement 4.** The role of FOXH1 in SMAD2-mediated chromatin remodeling. (A and B) P19 cells were transfected with either non-targeting (NT) or *Foxh1* siRNAs, and were then signal inhibited (SB-431542) or stimulated with Activin for 1 hr after SB-431542 washout. The nucleosomes flanking or at selected SBSs were assayed for H3K27Ac enrichment by ChIP-PCR (A) or assayed for FAIRE-PCR (B). Plotted are the means and SEM of three independent experiments performed in duplicate. n.s., not significant. \*\*\*\* corresponds to a p value of < 0.0001, \*\*\* corresponds to a p value of < 0.001, \*\* corresponds to a p value of < 0.01.

DOI: [10.7554/eLife.22474.026](https://doi.org/10.7554/eLife.22474.026)

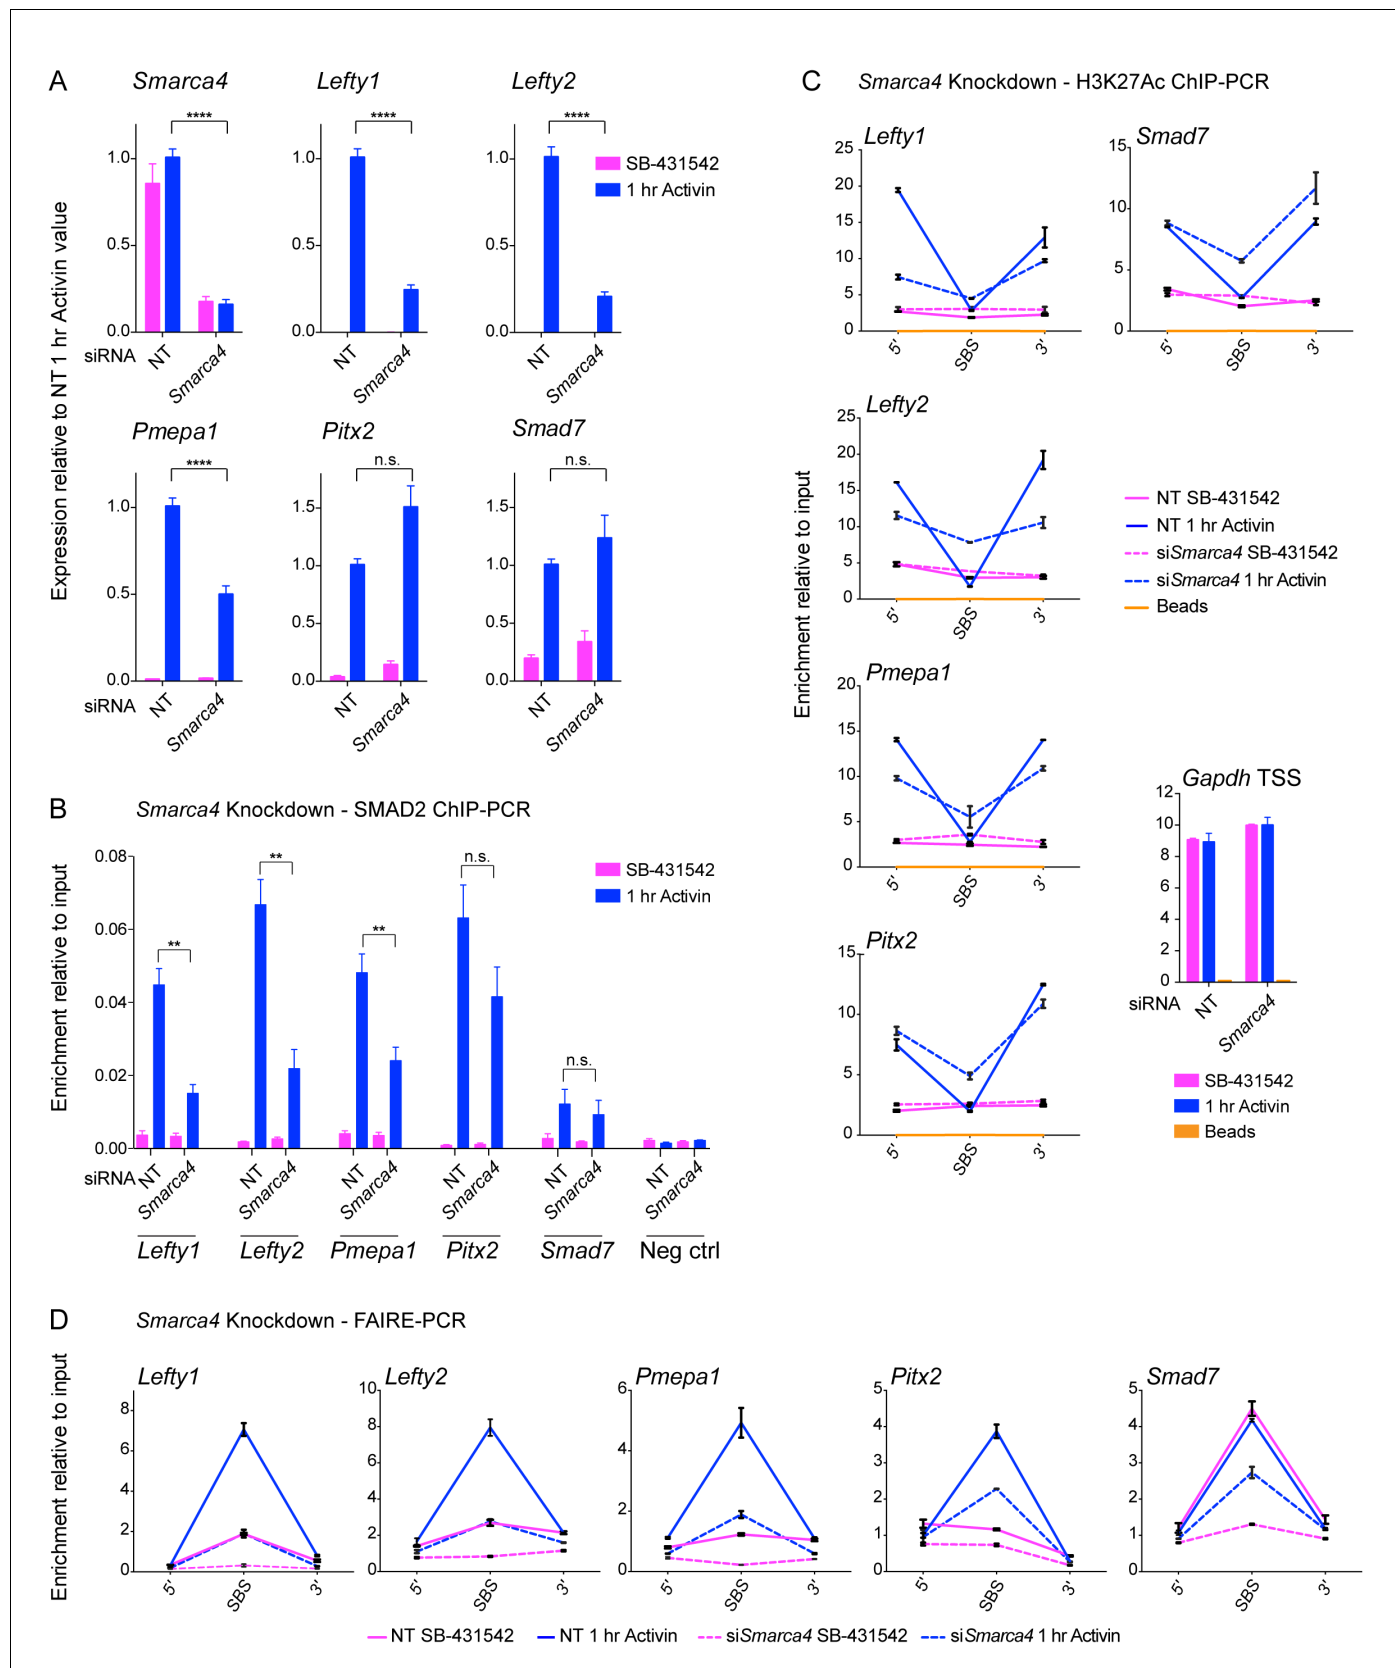

**Figure 8.** SMARCA4 is required for SMAD2 binding, nucleosome eviction and histone acetylation at a subset of Activin target genes. (A) P19 cells were transfected with either non-targeting (NT) or *Smarca4* siRNAs. Cells were then signal inhibited (SB-431542) or stimulated with Activin for 1 hr after SB-431542. Figure 8 continued on next page

*Figure 8 continued*

431542 washout. They were assayed for transcription by qPCR. The data shown are means  $\pm$  SEM from four independent experiments. (B–D). Samples were prepared as for A and assayed for SMAD2 ChIP-PCR (B), H3K27Ac ChIP-PCR (C), or FAIRE-PCR (D) on the selected SBSs indicated. Plotted in B are the means and SEM of four independent experiments. Neg ctrl, negative control. The data in C and D are from a representative experiment of three (means  $\pm$  SD). See **Figure 8—figure supplement 1** for the averages of the three experiments and the statistical analyses. In A and B, \*\*\*\* corresponds to a p value of  $< 0.0001$ . \*\* corresponds to a p value of  $< 0.01$ ; n.s., not significant.

DOI: [10.7554/eLife.22474.027](https://doi.org/10.7554/eLife.22474.027)

## A H3K27Ac enrichment

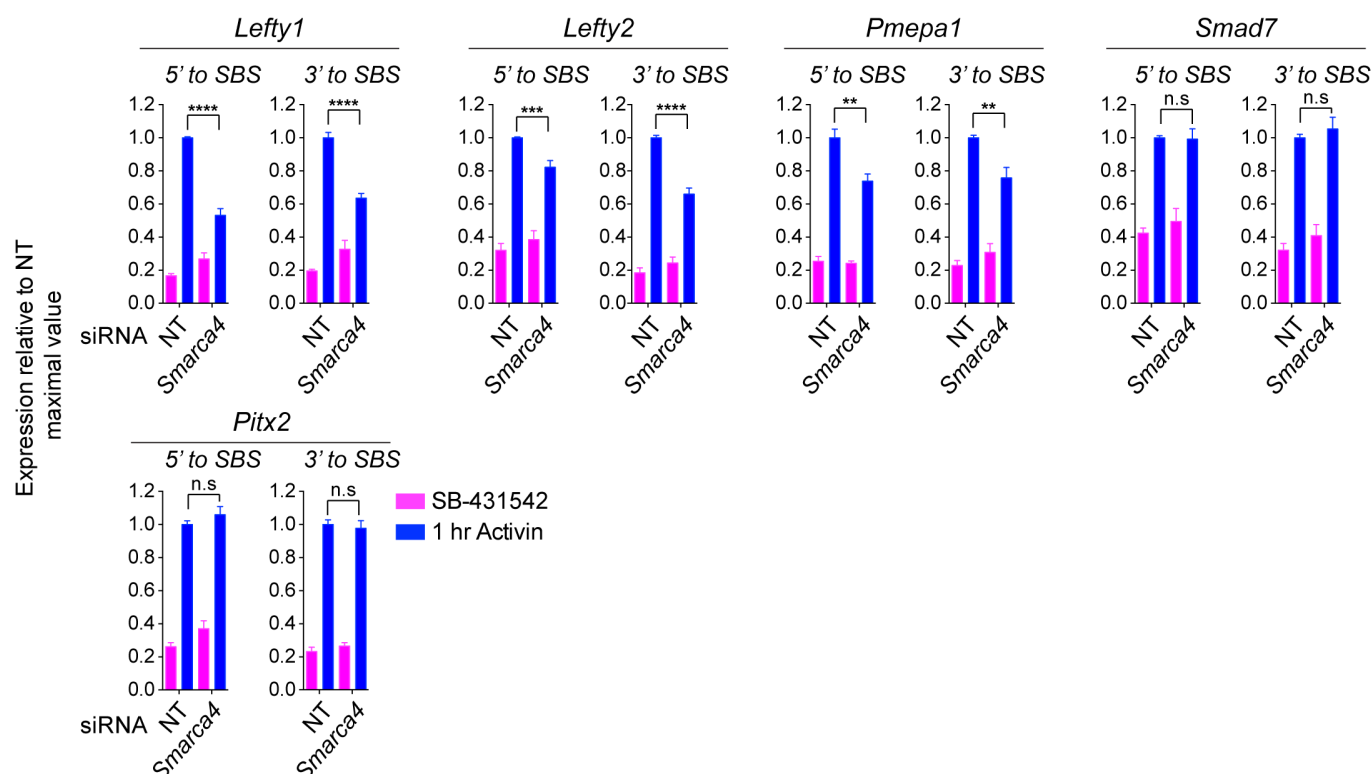

## B FAIRE

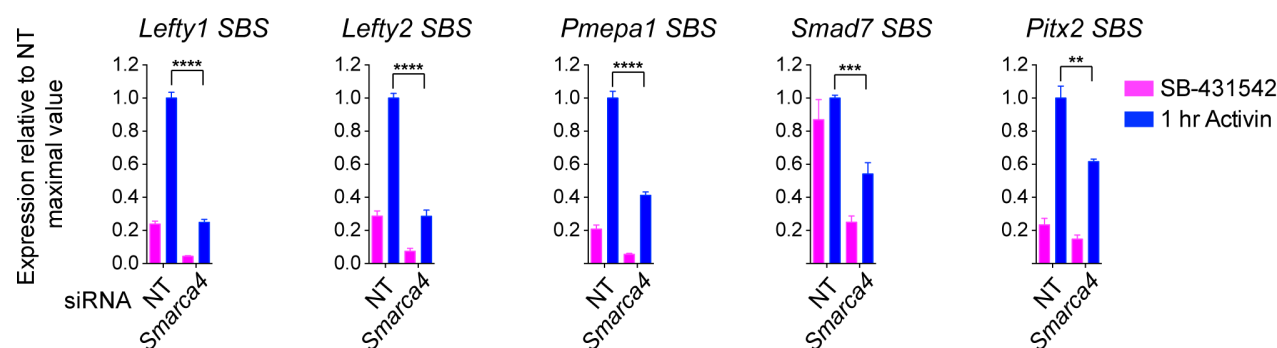

**Figure 8—figure supplement 1.** The role of SMARCA4 in SMAD2-mediated chromatin remodeling. (A and B) P19 cells were transfected with either non-targeting (NT) or *Smarca4* siRNAs, and were then signal inhibited (SB-431542), or stimulated with Activin for 1 hr after SB-431542 washout. The nucleosomes flanking or at selected SBSs were assayed for H3K27Ac enrichment by ChIP-PCR (A) or assayed for FAIRE-PCR (B). Plotted are the means and SEM of three independent experiments performed in duplicate. n.s., not significant. \*\*\*\* corresponds to a p value < 0.0001, \*\*\* corresponds to a p value of < 0.001, \*\* corresponds to a p value of < 0.01.

DOI: [10.7554/eLife.22474.028](https://doi.org/10.7554/eLife.22474.028)

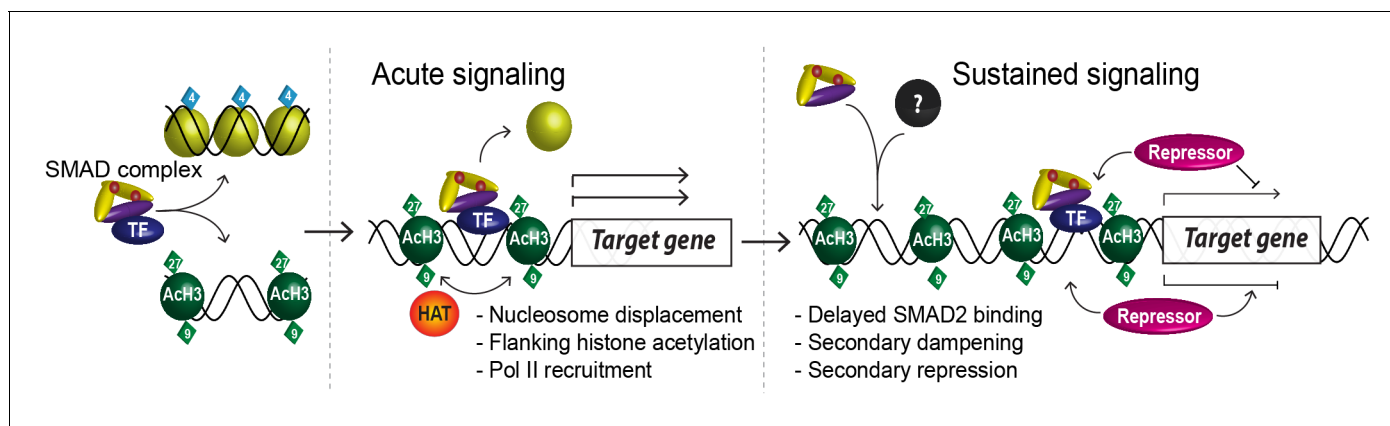

**Figure 9.** A model of dynamic SMAD2-dependent transcription. The two modes of SMAD2 binding to either acetylated (green diamonds) nucleosome-depleted chromatin or closed, non-acetylated chromatin marked by H3K4Me1 (blue diamonds) upon Activin stimulation from the SB-431542 state are depicted. SMAD2 binds in conjunction with FOXH1 at some targets or with distinct TFs at others. Once bound, SMAD2-containing complexes locally increase H3K27Ac and H3K9Ac via recruitment of HATs, and can induce nucleosome displacement, which for 'baseline off' genes requires SMARCA4. Upon sustained signaling, SMAD2 may be recruited to new targets in a delayed manner or already-bound SMAD2 may recruit repressors to dampen or inhibit transcription at later time points.

DOI: [10.7554/eLife.22474.029](https://doi.org/10.7554/eLife.22474.029)
